# Supplementary material for: Human wellbeing outcomes of involvement in industrial crop production: Evidence from sugarcane, oil palm and jatropha sites in Ghana
Source: PLoS One. 2019 Apr 25;14(4):e0215433. doi: 10.1371/journal.pone.0215433 (PMC6483194; doi:10.1371/journal.pone.0215433)
Supplement: S3 File — (XLSX) [file pone.0215433.s003.xlsx]

## Sheet: MPI
ID	Observation	Years of Schooling	Education1 weight	Child School Attendance	Education 2 weight	Child Mortality	Health1 weight	Nutrition (FSC)	Health2 weight	Electricity	Living Standard1 weight	Improved Sanitation	Living Standard2 weight	Improved Water	Living Standard3 weight	Flooring	Living Standard4 weight	Clean cooking fuel	Living Standard5 weight	Asset Ownership	Living Standard6 weight	Deprivation score (Ci in %)	Hurdle	Multidimensionally Poor (c >= 33.3 %)	Censored deprivation score [Ci(k)]
1	Sugarcane_grower	0	0.166667	1	0.166667	0	0.166667	0	0.166667	0	0.0555556	1	0.0555556	1	0.0555556	1	0.0555556	1	0.0555556	0	0.0555556	0.388889	0.333	Yes	0.388889
2	Sugarcane_grower	0	0.166667	0	0.166667	0	0.166667	0	0.166667	0	0.0555556	1	0.0555556	0	0.0555556	0	0.0555556	1	0.0555556	0	0.0555556	0.111111	0.333	No	0
3	Sugarcane_grower	0	0.166667	1	0.166667	0	0.166667	0	0.166667	1	0.0555556	0	0.0555556	0	0.0555556	1	0.0555556	1	0.0555556	0	0.0555556	0.333333	0.333	Yes	0.333333
4	Sugarcane_grower	0	0.166667	1	0.166667	0	0.166667	0	0.166667	0	0.0555556	1	0.0555556	1	0.0555556	1	0.0555556	1	0.0555556	0	0.0555556	0.388889	0.333	Yes	0.388889
5	Sugarcane_grower	0	0.166667	0	0.166667	0	0.166667	0	0.166667	1	0.0555556	1	0.0555556	0	0.0555556	0	0.0555556	1	0.0555556	0	0.0555556	0.166667	0.333	No	0
6	Sugarcane_grower	0	0.166667	0	0.166667	0	0.166667	0	0.166667	1	0.0555556	0	0.0555556	0	0.0555556	0	0.0555556	1	0.0555556	0	0.0555556	0.111111	0.333	No	0
7	Sugarcane_grower	0	0.166667	1	0.166667	0	0.166667	0	0.166667	1	0.0555556	1	0.0555556	1	0.0555556	0	0.0555556	1	0.0555556	0	0.0555556	0.388889	0.333	Yes	0.388889
8	Sugarcane_grower	0	0.166667	0	0.166667	0	0.166667	0	0.166667	1	0.0555556	1	0.0555556	1	0.0555556	1	0.0555556	1	0.0555556	0	0.0555556	0.277778	0.333	No	0
9	Sugarcane_grower	0	0.166667	0	0.166667	0	0.166667	0	0.166667	1	0.0555556	1	0.0555556	0	0.0555556	0	0.0555556	1	0.0555556	0	0.0555556	0.166667	0.333	No	0
10	Sugarcane_grower	1	0.166667	1	0.166667	0	0.166667	0	0.166667	0	0.0555556	1	0.0555556	1	0.0555556	1	0.0555556	1	0.0555556	0	0.0555556	0.555556	0.333	Yes	0.555556
11	Sugarcane_grower	0	0.166667	1	0.166667	0	0.166667	0	0.166667	0	0.0555556	1	0.0555556	0	0.0555556	0	0.0555556	1	0.0555556	0	0.0555556	0.277778	0.333	No	0
12	Sugarcane_grower	0	0.166667	0	0.166667	0	0.166667	0	0.166667	1	0.0555556	0	0.0555556	0	0.0555556	0	0.0555556	1	0.0555556	0	0.0555556	0.111111	0.333	No	0
13	Sugarcane_grower	0	0.166667	0	0.166667	0	0.166667	0	0.166667	0	0.0555556	1	0.0555556	0	0.0555556	0	0.0555556	1	0.0555556	0	0.0555556	0.111111	0.333	No	0
14	Sugarcane_grower	0	0.166667	0	0.166667	0	0.166667	0	0.166667	1	0.0555556	0	0.0555556	1	0.0555556	0	0.0555556	1	0.0555556	0	0.0555556	0.166667	0.333	No	0
15	Sugarcane_grower	0	0.166667	0	0.166667	0	0.166667	1	0.166667	1	0.0555556	1	0.0555556	1	0.0555556	0	0.0555556	1	0.0555556	0	0.0555556	0.388889	0.333	Yes	0.388889
16	Sugarcane_grower	0	0.166667	0	0.166667	0	0.166667	0	0.166667	1	0.0555556	1	0.0555556	1	0.0555556	0	0.0555556	1	0.0555556	0	0.0555556	0.222222	0.333	No	0
17	Sugarcane_grower	0	0.166667	0	0.166667	0	0.166667	0	0.166667	1	0.0555556	1	0.0555556	0	0.0555556	0	0.0555556	1	0.0555556	0	0.0555556	0.166667	0.333	No	0
18	Sugarcane_grower	0	0.166667	0	0.166667	1	0.166667	1	0.166667	1	0.0555556	0	0.0555556	0	0.0555556	0	0.0555556	1	0.0555556	0	0.0555556	0.444444	0.333	Yes	0.444444
19	Sugarcane_grower	0	0.166667	0	0.166667	0	0.166667	0	0.166667	1	0.0555556	1	0.0555556	0	0.0555556	0	0.0555556	1	0.0555556	0	0.0555556	0.166667	0.333	No	0
20	Sugarcane_grower	0	0.166667	1	0.166667	0	0.166667	0	0.166667	0	0.0555556	0	0.0555556	0	0.0555556	0	0.0555556	1	0.0555556	0	0.0555556	0.222222	0.333	No	0
21	Sugarcane_grower	0	0.166667	0	0.166667	0	0.166667	0	0.166667	0	0.0555556	1	0.0555556	0	0.0555556	0	0.0555556	1	0.0555556	0	0.0555556	0.111111	0.333	No	0
22	Sugarcane_grower	0	0.166667	0	0.166667	0	0.166667	1	0.166667	0	0.0555556	1	0.0555556	0	0.0555556	0	0.0555556	1	0.0555556	0	0.0555556	0.277778	0.333	No	0
23	Sugarcane_grower	0	0.166667	0	0.166667	0	0.166667	0	0.166667	1	0.0555556	1	0.0555556	0	0.0555556	0	0.0555556	1	0.0555556	0	0.0555556	0.166667	0.333	No	0
24	Sugarcane_grower	0	0.166667	0	0.166667	1	0.166667	0	0.166667	0	0.0555556	0	0.0555556	1	0.0555556	0	0.0555556	0	0.0555556	0	0.0555556	0.222222	0.333	No	0
25	Sugarcane_grower	0	0.166667	0	0.166667	0	0.166667	1	0.166667	1	0.0555556	0	0.0555556	0	0.0555556	0	0.0555556	1	0.0555556	0	0.0555556	0.277778	0.333	No	0
26	Sugarcane_grower	0	0.166667	0	0.166667	0	0.166667	0	0.166667	1	0.0555556	1	0.0555556	1	0.0555556	0	0.0555556	1	0.0555556	0	0.0555556	0.222222	0.333	No	0
27	Sugarcane_grower	1	0.166667	0	0.166667	0	0.166667	0	0.166667	1	0.0555556	0	0.0555556	0	0.0555556	0	0.0555556	1	0.0555556	0	0.0555556	0.277778	0.333	No	0
28	Sugarcane_grower	0	0.166667	0	0.166667	0	0.166667	0	0.166667	1	0.0555556	1	0.0555556	1	0.0555556	1	0.0555556	1	0.0555556	0	0.0555556	0.277778	0.333	No	0
29	Sugarcane_grower	0	0.166667	0	0.166667	0	0.166667	0	0.166667	1	0.0555556	1	0.0555556	1	0.0555556	0	0.0555556	1	0.0555556	0	0.0555556	0.222222	0.333	No	0
30	Sugarcane_grower	1	0.166667	0	0.166667	0	0.166667	0	0.166667	1	0.0555556	1	0.0555556	0	0.0555556	1	0.0555556	1	0.0555556	0	0.0555556	0.388889	0.333	Yes	0.388889
31	Sugarcane_grower	0	0.166667	0	0.166667	0	0.166667	0	0.166667	1	0.0555556	0	0.0555556	0	0.0555556	0	0.0555556	1	0.0555556	0	0.0555556	0.111111	0.333	No	0
32	Sugarcane_grower	0	0.166667	0	0.166667	0	0.166667	0	0.166667	1	0.0555556	0	0.0555556	0	0.0555556	0	0.0555556	1	0.0555556	0	0.0555556	0.111111	0.333	No	0
33	Sugarcane_grower	0	0.166667	1	0.166667	1	0.166667	0	0.166667	0	0.0555556	1	0.0555556	0	0.0555556	0	0.0555556	1	0.0555556	0	0.0555556	0.444444	0.333	Yes	0.444444
34	Sugarcane_grower	0	0.166667	0	0.166667	0	0.166667	0	0.166667	1	0.0555556	1	0.0555556	1	0.0555556	0	0.0555556	1	0.0555556	0	0.0555556	0.222222	0.333	No	0
35	Sugarcane_grower	0	0.166667	1	0.166667	0	0.166667	0	0.166667	1	0.0555556	1	0.0555556	0	0.0555556	0	0.0555556	1	0.0555556	0	0.0555556	0.333333	0.333	Yes	0.333333
36	Sugarcane_grower	0	0.166667	0	0.166667	0	0.166667	1	0.166667	1	0.0555556	0	0.0555556	0	0.0555556	0	0.0555556	1	0.0555556	0	0.0555556	0.277778	0.333	No	0
37	Sugarcane_grower	0	0.166667	0	0.166667	1	0.166667	0	0.166667	1	0.0555556	1	0.0555556	0	0.0555556	0	0.0555556	1	0.0555556	0	0.0555556	0.333333	0.333	Yes	0.333333
38	Sugarcane_grower	0	0.166667	1	0.166667	0	0.166667	0	0.166667	1	0.0555556	1	0.0555556	0	0.0555556	0	0.0555556	1	0.0555556	0	0.0555556	0.333333	0.333	Yes	0.333333
39	Sugarcane_grower	0	0.166667	0	0.166667	0	0.166667	0	0.166667	1	0.0555556	1	0.0555556	1	0.0555556	1	0.0555556	1	0.0555556	0	0.0555556	0.277778	0.333	No	0
40	Sugarcane_grower	0	0.166667	0	0.166667	0	0.166667	0	0.166667	0	0.0555556	1	0.0555556	1	0.0555556	0	0.0555556	1	0.0555556	0	0.0555556	0.166667	0.333	No	0
41	Sugarcane_grower	0	0.166667	0	0.166667	0	0.166667	1	0.166667	1	0.0555556	0	0.0555556	0	0.0555556	0	0.0555556	1	0.0555556	0	0.0555556	0.277778	0.333	No	0
42	Sugarcane_grower	0	0.166667	0	0.166667	0	0.166667	0	0.166667	0	0.0555556	1	0.0555556	1	0.0555556	0	0.0555556	1	0.0555556	0	0.0555556	0.166667	0.333	No	0
43	Sugarcane_grower	1	0.166667	0	0.166667	0	0.166667	0	0.166667	0	0.0555556	1	0.0555556	1	0.0555556	0	0.0555556	1	0.0555556	0	0.0555556	0.333333	0.333	Yes	0.333333
44	Sugarcane_grower	0	0.166667	0	0.166667	0	0.166667	0	0.166667	1	0.0555556	1	0.0555556	1	0.0555556	0	0.0555556	1	0.0555556	0	0.0555556	0.222222	0.333	No	0
45	Sugarcane_grower	0	0.166667	0	0.166667	0	0.166667	0	0.166667	0	0.0555556	1	0.0555556	0	0.0555556	1	0.0555556	1	0.0555556	0	0.0555556	0.166667	0.333	No	0
46	Sugarcane_grower	0	0.166667	0	0.166667	1	0.166667	0	0.166667	0	0.0555556	0	0.0555556	0	0.0555556	0	0.0555556	1	0.0555556	0	0.0555556	0.222222	0.333	No	0
47	Sugarcane_grower	1	0.166667	1	0.166667	0	0.166667	0	0.166667	0	0.0555556	1	0.0555556	0	0.0555556	0	0.0555556	1	0.0555556	0	0.0555556	0.444444	0.333	Yes	0.444444
48	Sugarcane_grower	0	0.166667	0	0.166667	0	0.166667	0	0.166667	1	0.0555556	0	0.0555556	0	0.0555556	0	0.0555556	1	0.0555556	0	0.0555556	0.111111	0.333	No	0
49	Sugarcane_grower	0	0.166667	0	0.166667	1	0.166667	0	0.166667	0	0.0555556	0	0.0555556	0	0.0555556	0	0.0555556	1	0.0555556	0	0.0555556	0.222222	0.333	No	0
50	Sugarcane_grower	0	0.166667	0	0.166667	0	0.166667	0	0.166667	0	0.0555556	0	0.0555556	0	0.0555556	0	0.0555556	1	0.0555556	0	0.0555556	0.0555556	0.333	No	0
51	Sugarcane_grower	0	0.166667	0	0.166667	0	0.166667	0	0.166667	0	0.0555556	1	0.0555556	1	0.0555556	0	0.0555556	1	0.0555556	0	0.0555556	0.166667	0.333	No	0
52	Sugarcane_grower	0	0.166667	0	0.166667	0	0.166667	0	0.166667	0	0.0555556	1	0.0555556	0	0.0555556	0	0.0555556	1	0.0555556	0	0.0555556	0.111111	0.333	No	0
53	Sugarcane_grower	0	0.166667	0	0.166667	0	0.166667	0	0.166667	0	0.0555556	1	0.0555556	0	0.0555556	0	0.0555556	1	0.0555556	0	0.0555556	0.111111	0.333	No	0
54	Sugarcane_grower	0	0.166667	0	0.166667	0	0.166667	0	0.166667	0	0.0555556	1	0.0555556	0	0.0555556	0	0.0555556	1	0.0555556	0	0.0555556	0.111111	0.333	No	0
55	Sugarcane_grower	0	0.166667	0	0.166667	0	0.166667	0	0.166667	0	0.0555556	1	0.0555556	1	0.0555556	0	0.0555556	1	0.0555556	0	0.0555556	0.166667	0.333	No	0
56	Sugarcane_grower	0	0.166667	0	0.166667	0	0.166667	0	0.166667	0	0.0555556	0	0.0555556	0	0.0555556	1	0.0555556	1	0.0555556	0	0.0555556	0.111111	0.333	No	0
57	Sugarcane_grower	1	0.166667	0	0.166667	0	0.166667	0	0.166667	0	0.0555556	0	0.0555556	0	0.0555556	0	0.0555556	1	0.0555556	0	0.0555556	0.222222	0.333	No	0
58	Sugarcane_grower	0	0.166667	0	0.166667	0	0.166667	0	0.166667	0	0.0555556	1	0.0555556	1	0.0555556	0	0.0555556	1	0.0555556	0	0.0555556	0.166667	0.333	No	0
59	Sugarcane_grower	0	0.166667	0	0.166667	0	0.166667	0	0.166667	0	0.0555556	1	0.0555556	0	0.0555556	0	0.0555556	1	0.0555556	0	0.0555556	0.111111	0.333	No	0
60	Sugarcane_grower	0	0.166667	1	0.166667	1	0.166667	0	0.166667	0	0.0555556	1	0.0555556	0	0.0555556	0	0.0555556	1	0.0555556	0	0.0555556	0.444444	0.333	Yes	0.444444
61	Sugarcane_grower	0	0.166667	0	0.166667	0	0.166667	0	0.166667	0	0.0555556	1	0.0555556	0	0.0555556	0	0.0555556	1	0.0555556	0	0.0555556	0.111111	0.333	No	0
62	Sugarcane_grower	0	0.166667	0	0.166667	0	0.166667	0	0.166667	0	0.0555556	1	0.0555556	1	0.0555556	0	0.0555556	1	0.0555556	0	0.0555556	0.166667	0.333	No	0
63	Sugarcane_grower	0	0.166667	0	0.166667	0	0.166667	0	0.166667	0	0.0555556	1	0.0555556	1	0.0555556	1	0.0555556	1	0.0555556	0	0.0555556	0.222222	0.333	No	0
64	Sugarcane_grower	0	0.166667	0	0.166667	0	0.166667	0	0.166667	0	0.0555556	1	0.0555556	1	0.0555556	0	0.0555556	1	0.0555556	0	0.0555556	0.166667	0.333	No	0
65	Sugarcane_grower	0	0.166667	0	0.166667	0	0.166667	0	0.166667	0	0.0555556	1	0.0555556	0	0.0555556	0	0.0555556	0	0.0555556	0	0.0555556	0.0555556	0.333	No	0
66	Sugarcane_grower	0	0.166667	0	0.166667	0	0.166667	0	0.166667	0	0.0555556	1	0.0555556	1	0.0555556	0	0.0555556	1	0.0555556	0	0.0555556	0.166667	0.333	No	0
67	Sugarcane_grower	0	0.166667	0	0.166667	0	0.166667	0	0.166667	1	0.0555556	1	0.0555556	0	0.0555556	0	0.0555556	1	0.0555556	0	0.0555556	0.166667	0.333	No	0
68	Sugarcane_grower	0	0.166667	1	0.166667	0	0.166667	0	0.166667	0	0.0555556	1	0.0555556	1	0.0555556	0	0.0555556	1	0.0555556	0	0.0555556	0.333333	0.333	Yes	0.333333
69	Sugarcane_grower	0	0.166667	1	0.166667	1	0.166667	0	0.166667	0	0.0555556	1	0.0555556	1	0.0555556	0	0.0555556	0	0.0555556	0	0.0555556	0.444444	0.333	Yes	0.444444
70	Sugarcane_grower	0	0.166667	0	0.166667	0	0.166667	1	0.166667	0	0.0555556	1	0.0555556	0	0.0555556	0	0.0555556	1	0.0555556	0	0.0555556	0.277778	0.333	No	0
71	Sugarcane_grower	0	0.166667	0	0.166667	1	0.166667	0	0.166667	1	0.0555556	1	0.0555556	0	0.0555556	0	0.0555556	1	0.0555556	0	0.0555556	0.333333	0.333	Yes	0.333333
72	Sugarcane_grower	0	0.166667	0	0.166667	0	0.166667	0	0.166667	0	0.0555556	1	0.0555556	1	0.0555556	1	0.0555556	1	0.0555556	0	0.0555556	0.222222	0.333	No	0
73	Sugarcane_grower	0	0.166667	1	0.166667	0	0.166667	1	0.166667	0	0.0555556	1	0.0555556	0	0.0555556	0	0.0555556	1	0.0555556	0	0.0555556	0.444444	0.333	Yes	0.444444
74	Sugarcane_grower	0	0.166667	0	0.166667	0	0.166667	0	0.166667	0	0.0555556	1	0.0555556	0	0.0555556	0	0.0555556	1	0.0555556	0	0.0555556	0.111111	0.333	No	0
75	Sugarcane_grower	1	0.166667	1	0.166667	0	0.166667	0	0.166667	0	0.0555556	1	0.0555556	0	0.0555556	0	0.0555556	1	0.0555556	0	0.0555556	0.444444	0.333	Yes	0.444444
76	Sugarcane_grower	0	0.166667	0	0.166667	0	0.166667	0	0.166667	0	0.0555556	1	0.0555556	0	0.0555556	0	0.0555556	1	0.0555556	0	0.0555556	0.111111	0.333	No	0
77	Sugarcane_grower	0	0.166667	0	0.166667	0	0.166667	0	0.166667	1	0.0555556	1	0.0555556	1	0.0555556	0	0.0555556	1	0.0555556	0	0.0555556	0.222222	0.333	No	0
78	Sugarcane_grower	1	0.166667	0	0.166667	0	0.166667	1	0.166667	0	0.0555556	1	0.0555556	0	0.0555556	0	0.0555556	1	0.0555556	0	0.0555556	0.444444	0.333	Yes	0.444444
79	Sugarcane_grower	1	0.166667	0	0.166667	0	0.166667	0	0.166667	0	0.0555556	1	0.0555556	0	0.0555556	0	0.0555556	1	0.0555556	0	0.0555556	0.277778	0.333	No	0
80	Sugarcane_grower	0	0.166667	0	0.166667	0	0.166667	0	0.166667	1	0.0555556	0	0.0555556	1	0.0555556	0	0.0555556	1	0.0555556	0	0.0555556	0.166667	0.333	No	0
81	Sugarcane_grower	0	0.166667	0	0.166667	0	0.166667	0	0.166667	0	0.0555556	0	0.0555556	1	0.0555556	0	0.0555556	1	0.0555556	0	0.0555556	0.111111	0.333	No	0
82	Sugarcane_grower	0	0.166667	0	0.166667	0	0.166667	0	0.166667	0	0.0555556	0	0.0555556	0	0.0555556	0	0.0555556	1	0.0555556	0	0.0555556	0.0555556	0.333	No	0
83	Sugarcane_grower	0	0.166667	1	0.166667	1	0.166667	0	0.166667	0	0.0555556	1	0.0555556	0	0.0555556	1	0.0555556	1	0.0555556	0	0.0555556	0.5	0.333	Yes	0.5
84	Sugarcane_grower	1	0.166667	0	0.166667	1	0.166667	0	0.166667	0	0.0555556	1	0.0555556	0	0.0555556	0	0.0555556	1	0.0555556	0	0.0555556	0.444444	0.333	Yes	0.444444
85	Sugarcane_grower	0	0.166667	0	0.166667	0	0.166667	0	0.166667	1	0.0555556	1	0.0555556	0	0.0555556	0	0.0555556	1	0.0555556	0	0.0555556	0.166667	0.333	No	0
86	Sugarcane_grower	1	0.166667	0	0.166667	1	0.166667	0	0.166667	0	0.0555556	0	0.0555556	0	0.0555556	0	0.0555556	1	0.0555556	0	0.0555556	0.388889	0.333	Yes	0.388889
87	Sugarcane_grower	0	0.166667	0	0.166667	0	0.166667	0	0.166667	0	0.0555556	0	0.0555556	0	0.0555556	0	0.0555556	1	0.0555556	0	0.0555556	0.0555556	0.333	No	0
88	Sugarcane_grower	0	0.166667	0	0.166667	0	0.166667	0	0.166667	0	0.0555556	0	0.0555556	0	0.0555556	0	0.0555556	1	0.0555556	0	0.0555556	0.0555556	0.333	No	0
89	Sugarcane_grower	0	0.166667	1	0.166667	0	0.166667	0	0.166667	0	0.0555556	1	0.0555556	0	0.0555556	0	0.0555556	1	0.0555556	0	0.0555556	0.277778	0.333	No	0
90	Sugarcane_grower	0	0.166667	0	0.166667	0	0.166667	0	0.166667	0	0.0555556	1	0.0555556	0	0.0555556	0	0.0555556	1	0.0555556	0	0.0555556	0.111111	0.333	No	0
91	Sugarcane_grower	0	0.166667	0	0.166667	0	0.166667	0	0.166667	0	0.0555556	1	0.0555556	0	0.0555556	0	0.0555556	1	0.0555556	0	0.0555556	0.111111	0.333	No	0
92	Sugarcane_grower	0	0.166667	0	0.166667	0	0.166667	0	0.166667	0	0.0555556	0	0.0555556	0	0.0555556	0	0.0555556	1	0.0555556	1	0.0555556	0.111111	0.333	No	0
93	Sugarcane_grower	0	0.166667	0	0.166667	1	0.166667	0	0.166667	0	0.0555556	0	0.0555556	0	0.0555556	0	0.0555556	1	0.0555556	0	0.0555556	0.222222	0.333	No	0
94	Sugarcane_grower	0	0.166667	0	0.166667	0	0.166667	0	0.166667	0	0.0555556	0	0.0555556	0	0.0555556	0	0.0555556	1	0.0555556	0	0.0555556	0.0555556	0.333	No	0
95	Sugarcane_grower	0	0.166667	0	0.166667	0	0.166667	0	0.166667	0	0.0555556	0	0.0555556	1	0.0555556	0	0.0555556	1	0.0555556	0	0.0555556	0.111111	0.333	No	0
96	Sugarcane_grower	0	0.166667	0	0.166667	0	0.166667	0	0.166667	1	0.0555556	1	0.0555556	0	0.0555556	0	0.0555556	1	0.0555556	0	0.0555556	0.166667	0.333	No	0
97	Sugarcane_grower	0	0.166667	0	0.166667	0	0.166667	0	0.166667	0	0.0555556	0	0.0555556	0	0.0555556	0	0.0555556	1	0.0555556	0	0.0555556	0.0555556	0.333	No	0
98	Sugarcane_grower	0	0.166667	0	0.166667	1	0.166667	0	0.166667	0	0.0555556	0	0.0555556	0	0.0555556	0	0.0555556	1	0.0555556	0	0.0555556	0.222222	0.333	No	0
99	Sugarcane_grower	0	0.166667	0	0.166667	0	0.166667	0	0.166667	0	0.0555556	0	0.0555556	0	0.0555556	0	0.0555556	1	0.0555556	0	0.0555556	0.0555556	0.333	No	0
100	Sugarcane_grower	0	0.166667	0	0.166667	0	0.166667	0	0.166667	0	0.0555556	0	0.0555556	1	0.0555556	0	0.0555556	1	0.0555556	0	0.0555556	0.111111	0.333	No	0
101	Sugarcane_control	0	0.166667	0	0.166667	0	0.166667	1	0.166667	0	0.0555556	1	0.0555556	0	0.0555556	0	0.0555556	1	0.0555556	0	0.0555556	0.277778	0.333	No	0
102	Sugarcane_control	0	0.166667	0	0.166667	0	0.166667	0	0.166667	0	0.0555556	1	0.0555556	0	0.0555556	0	0.0555556	1	0.0555556	0	0.0555556	0.111111	0.333	No	0
103	Sugarcane_control	0	0.166667	0	0.166667	0	0.166667	1	0.166667	0	0.0555556	1	0.0555556	0	0.0555556	0	0.0555556	1	0.0555556	0	0.0555556	0.277778	0.333	No	0
104	Sugarcane_control	0	0.166667	0	0.166667	0	0.166667	0	0.166667	0	0.0555556	0	0.0555556	0	0.0555556	0	0.0555556	1	0.0555556	0	0.0555556	0.0555556	0.333	No	0
105	Sugarcane_control	0	0.166667	0	0.166667	0	0.166667	1	0.166667	0	0.0555556	1	0.0555556	1	0.0555556	0	0.0555556	1	0.0555556	0	0.0555556	0.333333	0.333	Yes	0.333333
106	Sugarcane_control	0	0.166667	0	0.166667	1	0.166667	1	0.166667	0	0.0555556	1	0.0555556	0	0.0555556	0	0.0555556	1	0.0555556	0	0.0555556	0.444444	0.333	Yes	0.444444
107	Sugarcane_control	0	0.166667	1	0.166667	0	0.166667	1	0.166667	0	0.0555556	1	0.0555556	0	0.0555556	0	0.0555556	1	0.0555556	0	0.0555556	0.444444	0.333	Yes	0.444444
108	Sugarcane_control	0	0.166667	1	0.166667	0	0.166667	1	0.166667	0	0.0555556	0	0.0555556	0	0.0555556	1	0.0555556	1	0.0555556	0	0.0555556	0.444444	0.333	Yes	0.444444
109	Sugarcane_control	0	0.166667	0	0.166667	0	0.166667	1	0.166667	0	0.0555556	1	0.0555556	0	0.0555556	0	0.0555556	1	0.0555556	0	0.0555556	0.277778	0.333	No	0
110	Sugarcane_control	1	0.166667	0	0.166667	0	0.166667	0	0.166667	0	0.0555556	1	0.0555556	0	0.0555556	0	0.0555556	1	0.0555556	0	0.0555556	0.277778	0.333	No	0
111	Sugarcane_control	0	0.166667	0	0.166667	0	0.166667	0	0.166667	0	0.0555556	1	0.0555556	0	0.0555556	0	0.0555556	1	0.0555556	0	0.0555556	0.111111	0.333	No	0
112	Sugarcane_control	0	0.166667	0	0.166667	0	0.166667	1	0.166667	0	0.0555556	1	0.0555556	0	0.0555556	0	0.0555556	1	0.0555556	0	0.0555556	0.277778	0.333	No	0
113	Sugarcane_control	0	0.166667	0	0.166667	0	0.166667	0	0.166667	0	0.0555556	0	0.0555556	1	0.0555556	1	0.0555556	0	0.0555556	0	0.0555556	0.111111	0.333	No	0
114	Sugarcane_control	0	0.166667	0	0.166667	0	0.166667	0	0.166667	0	0.0555556	1	0.0555556	0	0.0555556	1	0.0555556	1	0.0555556	0	0.0555556	0.166667	0.333	No	0
115	Sugarcane_control	0	0.166667	1	0.166667	0	0.166667	0	0.166667	0	0.0555556	0	0.0555556	0	0.0555556	1	0.0555556	1	0.0555556	0	0.0555556	0.277778	0.333	No	0
116	Sugarcane_control	0	0.166667	0	0.166667	1	0.166667	0	0.166667	1	0.0555556	1	0.0555556	0	0.0555556	1	0.0555556	1	0.0555556	0	0.0555556	0.388889	0.333	Yes	0.388889
117	Sugarcane_control	0	0.166667	1	0.166667	0	0.166667	1	0.166667	0	0.0555556	1	0.0555556	0	0.0555556	0	0.0555556	1	0.0555556	0	0.0555556	0.444444	0.333	Yes	0.444444
118	Sugarcane_control	0	0.166667	1	0.166667	0	0.166667	1	0.166667	1	0.0555556	0	0.0555556	0	0.0555556	1	0.0555556	1	0.0555556	0	0.0555556	0.5	0.333	Yes	0.5
119	Sugarcane_control	0	0.166667	1	0.166667	1	0.166667	0	0.166667	0	0.0555556	0	0.0555556	0	0.0555556	1	0.0555556	1	0.0555556	0	0.0555556	0.444444	0.333	Yes	0.444444
120	Sugarcane_control	0	0.166667	0	0.166667	0	0.166667	0	0.166667	1	0.0555556	0	0.0555556	0	0.0555556	1	0.0555556	1	0.0555556	0	0.0555556	0.166667	0.333	No	0
121	Sugarcane_control	0	0.166667	0	0.166667	0	0.166667	0	0.166667	0	0.0555556	1	0.0555556	0	0.0555556	0	0.0555556	1	0.0555556	0	0.0555556	0.111111	0.333	No	0
122	Sugarcane_control	0	0.166667	0	0.166667	0	0.166667	0	0.166667	0	0.0555556	0	0.0555556	1	0.0555556	0	0.0555556	1	0.0555556	0	0.0555556	0.111111	0.333	No	0
123	Sugarcane_control	0	0.166667	1	0.166667	1	0.166667	0	0.166667	1	0.0555556	1	0.0555556	1	0.0555556	0	0.0555556	1	0.0555556	0	0.0555556	0.555556	0.333	Yes	0.555556
124	Sugarcane_control	0	0.166667	0	0.166667	0	0.166667	0	0.166667	1	0.0555556	1	0.0555556	0	0.0555556	0	0.0555556	1	0.0555556	0	0.0555556	0.166667	0.333	No	0
125	Sugarcane_control	0	0.166667	0	0.166667	0	0.166667	0	0.166667	1	0.0555556	1	0.0555556	0	0.0555556	0	0.0555556	1	0.0555556	0	0.0555556	0.166667	0.333	No	0
126	Sugarcane_control	0	0.166667	0	0.166667	0	0.166667	1	0.166667	1	0.0555556	1	0.0555556	1	0.0555556	0	0.0555556	1	0.0555556	0	0.0555556	0.388889	0.333	Yes	0.388889
127	Sugarcane_control	1	0.166667	0	0.166667	0	0.166667	0	0.166667	1	0.0555556	0	0.0555556	1	0.0555556	0	0.0555556	1	0.0555556	0	0.0555556	0.333333	0.333	Yes	0.333333
128	Sugarcane_control	0	0.166667	0	0.166667	0	0.166667	0	0.166667	1	0.0555556	0	0.0555556	0	0.0555556	0	0.0555556	1	0.0555556	0	0.0555556	0.111111	0.333	No	0
129	Sugarcane_control	0	0.166667	0	0.166667	0	0.166667	0	0.166667	1	0.0555556	1	0.0555556	1	0.0555556	0	0.0555556	1	0.0555556	0	0.0555556	0.222222	0.333	No	0
130	Sugarcane_control	1	0.166667	0	0.166667	1	0.166667	0	0.166667	1	0.0555556	1	0.0555556	0	0.0555556	1	0.0555556	1	0.0555556	1	0.0555556	0.611111	0.333	Yes	0.611111
131	Sugarcane_control	0	0.166667	1	0.166667	1	0.166667	0	0.166667	0	0.0555556	0	0.0555556	0	0.0555556	0	0.0555556	1	0.0555556	0	0.0555556	0.388889	0.333	Yes	0.388889
132	Sugarcane_control	0	0.166667	0	0.166667	0	0.166667	0	0.166667	1	0.0555556	1	0.0555556	1	0.0555556	0	0.0555556	1	0.0555556	0	0.0555556	0.222222	0.333	No	0
133	Sugarcane_control	0	0.166667	0	0.166667	0	0.166667	0	0.166667	1	0.0555556	0	0.0555556	0	0.0555556	0	0.0555556	1	0.0555556	0	0.0555556	0.111111	0.333	No	0
134	Sugarcane_control	0	0.166667	0	0.166667	0	0.166667	0	0.166667	0	0.0555556	0	0.0555556	0	0.0555556	0	0.0555556	1	0.0555556	0	0.0555556	0.0555556	0.333	No	0
135	Sugarcane_control	0	0.166667	0	0.166667	0	0.166667	0	0.166667	0	0.0555556	1	0.0555556	0	0.0555556	0	0.0555556	1	0.0555556	0	0.0555556	0.111111	0.333	No	0
136	Sugarcane_control	0	0.166667	0	0.166667	0	0.166667	0	0.166667	1	0.0555556	0	0.0555556	0	0.0555556	0	0.0555556	1	0.0555556	0	0.0555556	0.111111	0.333	No	0
137	Sugarcane_control	0	0.166667	0	0.166667	0	0.166667	0	0.166667	1	0.0555556	0	0.0555556	0	0.0555556	0	0.0555556	1	0.0555556	0	0.0555556	0.111111	0.333	No	0
138	Sugarcane_control	0	0.166667	0	0.166667	1	0.166667	0	0.166667	0	0.0555556	1	0.0555556	0	0.0555556	0	0.0555556	1	0.0555556	0	0.0555556	0.277778	0.333	No	0
139	Sugarcane_control	0	0.166667	0	0.166667	1	0.166667	0	0.166667	1	0.0555556	0	0.0555556	0	0.0555556	0	0.0555556	1	0.0555556	0	0.0555556	0.277778	0.333	No	0
140	Sugarcane_control	0	0.166667	0	0.166667	0	0.166667	0	0.166667	1	0.0555556	0	0.0555556	0	0.0555556	0	0.0555556	1	0.0555556	0	0.0555556	0.111111	0.333	No	0
141	Sugarcane_control	0	0.166667	0	0.166667	0	0.166667	0	0.166667	1	0.0555556	0	0.0555556	0	0.0555556	0	0.0555556	1	0.0555556	0	0.0555556	0.111111	0.333	No	0
142	Sugarcane_control	0	0.166667	0	0.166667	0	0.166667	0	0.166667	1	0.0555556	0	0.0555556	0	0.0555556	0	0.0555556	1	0.0555556	0	0.0555556	0.111111	0.333	No	0
143	Sugarcane_control	1	0.166667	0	0.166667	0	0.166667	0	0.166667	1	0.0555556	1	0.0555556	0	0.0555556	0	0.0555556	1	0.0555556	0	0.0555556	0.333333	0.333	Yes	0.333333
144	Sugarcane_control	0	0.166667	0	0.166667	0	0.166667	0	0.166667	1	0.0555556	1	0.0555556	1	0.0555556	0	0.0555556	1	0.0555556	0	0.0555556	0.222222	0.333	No	0
145	Sugarcane_control	0	0.166667	0	0.166667	0	0.166667	1	0.166667	0	0.0555556	1	0.0555556	0	0.0555556	0	0.0555556	0	0.0555556	0	0.0555556	0.222222	0.333	No	0
146	Sugarcane_control	0	0.166667	0	0.166667	0	0.166667	0	0.166667	0	0.0555556	1	0.0555556	0	0.0555556	0	0.0555556	0	0.0555556	0	0.0555556	0.0555556	0.333	No	0
147	Sugarcane_control	1	0.166667	0	0.166667	1	0.166667	0	0.166667	1	0.0555556	1	0.0555556	1	0.0555556	0	0.0555556	1	0.0555556	0	0.0555556	0.555556	0.333	Yes	0.555556
148	Sugarcane_control	0	0.166667	0	0.166667	0	0.166667	0	0.166667	1	0.0555556	1	0.0555556	0	0.0555556	0	0.0555556	1	0.0555556	0	0.0555556	0.166667	0.333	No	0
149	Sugarcane_control	0	0.166667	0	0.166667	0	0.166667	0	0.166667	0	0.0555556	0	0.0555556	0	0.0555556	1	0.0555556	1	0.0555556	0	0.0555556	0.111111	0.333	No	0
150	Sugarcane_control	0	0.166667	0	0.166667	0	0.166667	0	0.166667	1	0.0555556	1	0.0555556	1	0.0555556	0	0.0555556	1	0.0555556	0	0.0555556	0.222222	0.333	No	0
151	Sugarcane_control	0	0.166667	1	0.166667	0	0.166667	0	0.166667	1	0.0555556	1	0.0555556	1	0.0555556	1	0.0555556	1	0.0555556	0	0.0555556	0.444444	0.333	Yes	0.444444
152	Sugarcane_control	0	0.166667	0	0.166667	0	0.166667	0	0.166667	1	0.0555556	0	0.0555556	0	0.0555556	0	0.0555556	1	0.0555556	0	0.0555556	0.111111	0.333	No	0
153	Sugarcane_control	0	0.166667	0	0.166667	1	0.166667	0	0.166667	1	0.0555556	1	0.0555556	1	0.0555556	0	0.0555556	1	0.0555556	0	0.0555556	0.388889	0.333	Yes	0.388889
154	Sugarcane_control	0	0.166667	1	0.166667	0	0.166667	0	0.166667	1	0.0555556	1	0.0555556	0	0.0555556	0	0.0555556	1	0.0555556	0	0.0555556	0.333333	0.333	Yes	0.333333
155	Sugarcane_control	0	0.166667	0	0.166667	0	0.166667	0	0.166667	1	0.0555556	1	0.0555556	0	0.0555556	0	0.0555556	1	0.0555556	0	0.0555556	0.166667	0.333	No	0
156	Sugarcane_control	0	0.166667	1	0.166667	0	0.166667	0	0.166667	0	0.0555556	1	0.0555556	0	0.0555556	0	0.0555556	1	0.0555556	0	0.0555556	0.277778	0.333	No	0
157	Sugarcane_control	1	0.166667	0	0.166667	1	0.166667	0	0.166667	0	0.0555556	1	0.0555556	0	0.0555556	0	0.0555556	1	0.0555556	0	0.0555556	0.444444	0.333	Yes	0.444444
158	Sugarcane_control	0	0.166667	0	0.166667	1	0.166667	0	0.166667	1	0.0555556	1	0.0555556	1	0.0555556	0	0.0555556	1	0.0555556	0	0.0555556	0.388889	0.333	Yes	0.388889
159	Sugarcane_control	0	0.166667	1	0.166667	0	0.166667	0	0.166667	0	0.0555556	1	0.0555556	0	0.0555556	0	0.0555556	1	0.0555556	0	0.0555556	0.277778	0.333	No	0
160	Sugarcane_control	0	0.166667	0	0.166667	0	0.166667	0	0.166667	0	0.0555556	1	0.0555556	0	0.0555556	0	0.0555556	1	0.0555556	0	0.0555556	0.111111	0.333	No	0
161	Sugarcane_control	0	0.166667	0	0.166667	0	0.166667	0	0.166667	1	0.0555556	1	0.0555556	0	0.0555556	0	0.0555556	1	0.0555556	0	0.0555556	0.166667	0.333	No	0
162	Sugarcane_control	0	0.166667	0	0.166667	0	0.166667	0	0.166667	0	0.0555556	1	0.0555556	0	0.0555556	0	0.0555556	1	0.0555556	0	0.0555556	0.111111	0.333	No	0
163	Sugarcane_control	0	0.166667	0	0.166667	0	0.166667	0	0.166667	1	0.0555556	0	0.0555556	0	0.0555556	0	0.0555556	1	0.0555556	0	0.0555556	0.111111	0.333	No	0
164	Sugarcane_control	0	0.166667	0	0.166667	0	0.166667	0	0.166667	1	0.0555556	1	0.0555556	1	0.0555556	0	0.0555556	1	0.0555556	0	0.0555556	0.222222	0.333	No	0
165	Sugarcane_control	0	0.166667	0	0.166667	1	0.166667	0	0.166667	1	0.0555556	1	0.0555556	0	0.0555556	0	0.0555556	1	0.0555556	0	0.0555556	0.333333	0.333	Yes	0.333333
166	Sugarcane_control	0	0.166667	0	0.166667	0	0.166667	0	0.166667	1	0.0555556	0	0.0555556	0	0.0555556	1	0.0555556	1	0.0555556	0	0.0555556	0.166667	0.333	No	0
167	Sugarcane_control	0	0.166667	0	0.166667	1	0.166667	0	0.166667	1	0.0555556	0	0.0555556	0	0.0555556	1	0.0555556	1	0.0555556	0	0.0555556	0.333333	0.333	Yes	0.333333
168	Sugarcane_control	0	0.166667	0	0.166667	0	0.166667	0	0.166667	0	0.0555556	0	0.0555556	1	0.0555556	0	0.0555556	1	0.0555556	0	0.0555556	0.111111	0.333	No	0
169	Sugarcane_control	0	0.166667	0	0.166667	1	0.166667	0	0.166667	0	0.0555556	0	0.0555556	0	0.0555556	0	0.0555556	1	0.0555556	0	0.0555556	0.222222	0.333	No	0
170	Sugarcane_control	0	0.166667	0	0.166667	0	0.166667	0	0.166667	1	0.0555556	0	0.0555556	0	0.0555556	0	0.0555556	1	0.0555556	0	0.0555556	0.111111	0.333	No	0
171	Sugarcane_control	0	0.166667	0	0.166667	0	0.166667	0	0.166667	0	0.0555556	0	0.0555556	0	0.0555556	0	0.0555556	1	0.0555556	0	0.0555556	0.0555556	0.333	No	0
172	Sugarcane_control	0	0.166667	0	0.166667	1	0.166667	0	0.166667	0	0.0555556	0	0.0555556	0	0.0555556	0	0.0555556	1	0.0555556	0	0.0555556	0.222222	0.333	No	0
173	Sugarcane_control	0	0.166667	0	0.166667	0	0.166667	0	0.166667	0	0.0555556	0	0.0555556	0	0.0555556	0	0.0555556	1	0.0555556	0	0.0555556	0.0555556	0.333	No	0
174	Sugarcane_control	0	0.166667	0	0.166667	0	0.166667	0	0.166667	1	0.0555556	0	0.0555556	0	0.0555556	0	0.0555556	1	0.0555556	0	0.0555556	0.111111	0.333	No	0
175	Sugarcane_control	1	0.166667	0	0.166667	0	0.166667	0	0.166667	0	0.0555556	1	0.0555556	1	0.0555556	0	0.0555556	1	0.0555556	0	0.0555556	0.333333	0.333	Yes	0.333333
176	Sugarcane_control	0	0.166667	0	0.166667	0	0.166667	0	0.166667	0	0.0555556	0	0.0555556	0	0.0555556	0	0.0555556	1	0.0555556	0	0.0555556	0.0555556	0.333	No	0
177	Sugarcane_control	0	0.166667	0	0.166667	0	0.166667	0	0.166667	0	0.0555556	1	0.0555556	0	0.0555556	0	0.0555556	1	0.0555556	0	0.0555556	0.111111	0.333	No	0
178	Sugarcane_control	1	0.166667	0	0.166667	0	0.166667	0	0.166667	0	0.0555556	0	0.0555556	0	0.0555556	0	0.0555556	1	0.0555556	0	0.0555556	0.222222	0.333	No	0
179	Sugarcane_control	1	0.166667	0	0.166667	1	0.166667	0	0.166667	0	0.0555556	1	0.0555556	0	0.0555556	0	0.0555556	1	0.0555556	0	0.0555556	0.444444	0.333	Yes	0.444444
180	Sugarcane_control	0	0.166667	1	0.166667	0	0.166667	0	0.166667	0	0.0555556	0	0.0555556	0	0.0555556	0	0.0555556	1	0.0555556	0	0.0555556	0.222222	0.333	No	0
181	Sugarcane_control	0	0.166667	0	0.166667	0	0.166667	0	0.166667	0	0.0555556	1	0.0555556	0	0.0555556	0	0.0555556	1	0.0555556	0	0.0555556	0.111111	0.333	No	0
182	Sugarcane_control	0	0.166667	0	0.166667	0	0.166667	0	0.166667	0	0.0555556	1	0.0555556	0	0.0555556	0	0.0555556	1	0.0555556	0	0.0555556	0.111111	0.333	No	0
183	Sugarcane_control	0	0.166667	0	0.166667	0	0.166667	0	0.166667	1	0.0555556	1	0.0555556	0	0.0555556	0	0.0555556	1	0.0555556	0	0.0555556	0.166667	0.333	No	0
184	Sugarcane_control	1	0.166667	0	0.166667	0	0.166667	0	0.166667	0	0.0555556	1	0.0555556	0	0.0555556	0	0.0555556	1	0.0555556	0	0.0555556	0.277778	0.333	No	0
185	Sugarcane_control	0	0.166667	1	0.166667	0	0.166667	1	0.166667	0	0.0555556	1	0.0555556	0	0.0555556	0	0.0555556	1	0.0555556	0	0.0555556	0.444444	0.333	Yes	0.444444
186	Sugarcane_control	1	0.166667	0	0.166667	0	0.166667	0	0.166667	0	0.0555556	1	0.0555556	0	0.0555556	0	0.0555556	1	0.0555556	0	0.0555556	0.277778	0.333	No	0
187	Sugarcane_control	0	0.166667	0	0.166667	0	0.166667	0	0.166667	0	0.0555556	0	0.0555556	0	0.0555556	0	0.0555556	1	0.0555556	0	0.0555556	0.0555556	0.333	No	0
188	Sugarcane_control	0	0.166667	0	0.166667	0	0.166667	0	0.166667	0	0.0555556	1	0.0555556	0	0.0555556	0	0.0555556	1	0.0555556	0	0.0555556	0.111111	0.333	No	0
189	Sugarcane_control	0	0.166667	0	0.166667	0	0.166667	0	0.166667	0	0.0555556	0	0.0555556	0	0.0555556	0	0.0555556	1	0.0555556	0	0.0555556	0.0555556	0.333	No	0
190	Sugarcane_control	0	0.166667	0	0.166667	0	0.166667	0	0.166667	0	0.0555556	1	0.0555556	0	0.0555556	0	0.0555556	0	0.0555556	0	0.0555556	0.0555556	0.333	No	0
191	Sugarcane_control	0	0.166667	0	0.166667	1	0.166667	1	0.166667	0	0.0555556	1	0.0555556	0	0.0555556	0	0.0555556	0	0.0555556	0	0.0555556	0.388889	0.333	Yes	0.388889
192	Sugarcane_control	0	0.166667	1	0.166667	0	0.166667	1	0.166667	0	0.0555556	1	0.0555556	1	0.0555556	0	0.0555556	1	0.0555556	0	0.0555556	0.5	0.333	Yes	0.5
193	Sugarcane_control	0	0.166667	1	0.166667	0	0.166667	1	0.166667	0	0.0555556	0	0.0555556	0	0.0555556	1	0.0555556	1	0.0555556	0	0.0555556	0.444444	0.333	Yes	0.444444
194	Sugarcane_control	0	0.166667	1	0.166667	1	0.166667	0	0.166667	0	0.0555556	1	0.0555556	0	0.0555556	0	0.0555556	1	0.0555556	0	0.0555556	0.444444	0.333	Yes	0.444444
195	Sugarcane_control	0	0.166667	0	0.166667	0	0.166667	0	0.166667	0	0.0555556	0	0.0555556	0	0.0555556	0	0.0555556	1	0.0555556	0	0.0555556	0.0555556	0.333	No	0
196	Sugarcane_control	0	0.166667	0	0.166667	0	0.166667	0	0.166667	0	0.0555556	1	0.0555556	0	0.0555556	0	0.0555556	1	0.0555556	0	0.0555556	0.111111	0.333	No	0
197	Sugarcane_control	0	0.166667	0	0.166667	1	0.166667	0	0.166667	0	0.0555556	0	0.0555556	0	0.0555556	0	0.0555556	1	0.0555556	0	0.0555556	0.222222	0.333	No	0
198	Sugarcane_control	0	0.166667	0	0.166667	0	0.166667	0	0.166667	0	0.0555556	0	0.0555556	0	0.0555556	0	0.0555556	1	0.0555556	0	0.0555556	0.0555556	0.333	No	0
199	Sugarcane_control	0	0.166667	0	0.166667	0	0.166667	0	0.166667	0	0.0555556	1	0.0555556	0	0.0555556	0	0.0555556	1	0.0555556	0	0.0555556	0.111111	0.333	No	0
200	Sugarcane_control	0	0.166667	0	0.166667	1	0.166667	0	0.166667	0	0.0555556	0	0.0555556	0	0.0555556	0	0.0555556	1	0.0555556	0	0.0555556	0.222222	0.333	No	0
201	Oilpalm_Worker	0	0.166667	0	0.166667	0	0.166667	0	0.166667	0	0.0555556	0	0.0555556	0	0.0555556	0	0.0555556	0	0.0555556	0	0.0555556	0	0.333	No	0
202	Oilpalm_Worker	0	0.166667	1	0.166667	0	0.166667	0	0.166667	0	0.0555556	0	0.0555556	0	0.0555556	0	0.0555556	0	0.0555556	0	0.0555556	0.166667	0.333	No	0
203	Oilpalm_Worker	0	0.166667	0	0.166667	1	0.166667	0	0.166667	0	0.0555556	0	0.0555556	1	0.0555556	0	0.0555556	0	0.0555556	0	0.0555556	0.222222	0.333	No	0
204	Oilpalm_Worker	0	0.166667	0	0.166667	0	0.166667	1	0.166667	0	0.0555556	1	0.0555556	0	0.0555556	0	0.0555556	1	0.0555556	0	0.0555556	0.277778	0.333	No	0
205	Oilpalm_Worker	0	0.166667	0	0.166667	0	0.166667	0	0.166667	1	0.0555556	1	0.0555556	0	0.0555556	0	0.0555556	1	0.0555556	0	0.0555556	0.166667	0.333	No	0
206	Oilpalm_Worker	0	0.166667	0	0.166667	0	0.166667	0	0.166667	0	0.0555556	0	0.0555556	0	0.0555556	0	0.0555556	1	0.0555556	0	0.0555556	0.0555556	0.333	No	0
207	Oilpalm_Worker	0	0.166667	0	0.166667	0	0.166667	0	0.166667	0	0.0555556	1	0.0555556	0	0.0555556	0	0.0555556	1	0.0555556	0	0.0555556	0.111111	0.333	No	0
208	Oilpalm_Worker	0	0.166667	0	0.166667	0	0.166667	0	0.166667	0	0.0555556	1	0.0555556	0	0.0555556	0	0.0555556	1	0.0555556	0	0.0555556	0.111111	0.333	No	0
209	Oilpalm_Worker	0	0.166667	0	0.166667	0	0.166667	0	0.166667	0	0.0555556	1	0.0555556	0	0.0555556	0	0.0555556	1	0.0555556	0	0.0555556	0.111111	0.333	No	0
210	Oilpalm_Worker	1	0.166667	0	0.166667	0	0.166667	1	0.166667	0	0.0555556	1	0.0555556	0	0.0555556	0	0.0555556	1	0.0555556	0	0.0555556	0.444444	0.333	Yes	0.444444
211	Oilpalm_Worker	1	0.166667	0	0.166667	0	0.166667	0	0.166667	0	0.0555556	1	0.0555556	0	0.0555556	0	0.0555556	1	0.0555556	0	0.0555556	0.277778	0.333	No	0
212	Oilpalm_Worker	0	0.166667	0	0.166667	0	0.166667	0	0.166667	0	0.0555556	1	0.0555556	0	0.0555556	0	0.0555556	1	0.0555556	0	0.0555556	0.111111	0.333	No	0
213	Oilpalm_Worker	0	0.166667	0	0.166667	0	0.166667	0	0.166667	0	0.0555556	1	0.0555556	0	0.0555556	0	0.0555556	1	0.0555556	0	0.0555556	0.111111	0.333	No	0
214	Oilpalm_Worker	0	0.166667	0	0.166667	0	0.166667	0	0.166667	0	0.0555556	1	0.0555556	0	0.0555556	0	0.0555556	1	0.0555556	0	0.0555556	0.111111	0.333	No	0
215	Oilpalm_Worker	0	0.166667	0	0.166667	0	0.166667	0	0.166667	1	0.0555556	1	0.0555556	0	0.0555556	0	0.0555556	1	0.0555556	0	0.0555556	0.166667	0.333	No	0
216	Oilpalm_Worker	0	0.166667	0	0.166667	1	0.166667	0	0.166667	0	0.0555556	1	0.0555556	0	0.0555556	0	0.0555556	1	0.0555556	0	0.0555556	0.277778	0.333	No	0
217	Oilpalm_Worker	0	0.166667	0	0.166667	0	0.166667	0	0.166667	0	0.0555556	1	0.0555556	0	0.0555556	0	0.0555556	0	0.0555556	0	0.0555556	0.0555556	0.333	No	0
218	Oilpalm_Worker	0	0.166667	1	0.166667	1	0.166667	0	0.166667	0	0.0555556	1	0.0555556	0	0.0555556	0	0.0555556	1	0.0555556	0	0.0555556	0.444444	0.333	Yes	0.444444
219	Oilpalm_Worker	0	0.166667	0	0.166667	1	0.166667	0	0.166667	0	0.0555556	1	0.0555556	0	0.0555556	0	0.0555556	1	0.0555556	0	0.0555556	0.277778	0.333	No	0
220	Oilpalm_Worker	1	0.166667	0	0.166667	0	0.166667	0	0.166667	0	0.0555556	1	0.0555556	0	0.0555556	0	0.0555556	1	0.0555556	0	0.0555556	0.277778	0.333	No	0
221	Oilpalm_Worker	1	0.166667	0	0.166667	0	0.166667	0	0.166667	0	0.0555556	1	0.0555556	0	0.0555556	0	0.0555556	1	0.0555556	0	0.0555556	0.277778	0.333	No	0
222	Oilpalm_Worker	0	0.166667	0	0.166667	0	0.166667	0	0.166667	0	0.0555556	1	0.0555556	0	0.0555556	0	0.0555556	1	0.0555556	0	0.0555556	0.111111	0.333	No	0
223	Oilpalm_Worker	0	0.166667	0	0.166667	0	0.166667	0	0.166667	0	0.0555556	0	0.0555556	0	0.0555556	0	0.0555556	1	0.0555556	0	0.0555556	0.0555556	0.333	No	0
224	Oilpalm_Worker	0	0.166667	0	0.166667	0	0.166667	0	0.166667	0	0.0555556	1	0.0555556	0	0.0555556	0	0.0555556	1	0.0555556	0	0.0555556	0.111111	0.333	No	0
225	Oilpalm_Worker	0	0.166667	0	0.166667	0	0.166667	0	0.166667	0	0.0555556	1	0.0555556	0	0.0555556	0	0.0555556	1	0.0555556	0	0.0555556	0.111111	0.333	No	0
226	Oilpalm_Worker	0	0.166667	0	0.166667	0	0.166667	0	0.166667	0	0.0555556	1	0.0555556	0	0.0555556	0	0.0555556	1	0.0555556	0	0.0555556	0.111111	0.333	No	0
227	Oilpalm_Worker	0	0.166667	0	0.166667	0	0.166667	0	0.166667	0	0.0555556	1	0.0555556	0	0.0555556	0	0.0555556	0	0.0555556	0	0.0555556	0.0555556	0.333	No	0
228	Oilpalm_Worker	0	0.166667	0	0.166667	0	0.166667	0	0.166667	1	0.0555556	1	0.0555556	0	0.0555556	0	0.0555556	1	0.0555556	0	0.0555556	0.166667	0.333	No	0
229	Oilpalm_Worker	0	0.166667	0	0.166667	0	0.166667	0	0.166667	0	0.0555556	1	0.0555556	0	0.0555556	0	0.0555556	1	0.0555556	0	0.0555556	0.111111	0.333	No	0
230	Oilpalm_Worker	0	0.166667	0	0.166667	0	0.166667	0	0.166667	0	0.0555556	0	0.0555556	0	0.0555556	0	0.0555556	0	0.0555556	0	0.0555556	0	0.333	No	0
231	Oilpalm_Worker	0	0.166667	0	0.166667	0	0.166667	0	0.166667	0	0.0555556	1	0.0555556	0	0.0555556	0	0.0555556	0	0.0555556	0	0.0555556	0.0555556	0.333	No	0
232	Oilpalm_Worker	0	0.166667	0	0.166667	0	0.166667	0	0.166667	0	0.0555556	1	0.0555556	1	0.0555556	0	0.0555556	1	0.0555556	0	0.0555556	0.166667	0.333	No	0
233	Oilpalm_Worker	0	0.166667	0	0.166667	0	0.166667	0	0.166667	0	0.0555556	1	0.0555556	0	0.0555556	0	0.0555556	0	0.0555556	0	0.0555556	0.0555556	0.333	No	0
234	Oilpalm_Worker	0	0.166667	0	0.166667	0	0.166667	0	0.166667	1	0.0555556	1	0.0555556	0	0.0555556	0	0.0555556	0	0.0555556	0	0.0555556	0.111111	0.333	No	0
235	Oilpalm_Worker	0	0.166667	0	0.166667	0	0.166667	0	0.166667	0	0.0555556	1	0.0555556	0	0.0555556	0	0.0555556	1	0.0555556	0	0.0555556	0.111111	0.333	No	0
236	Oilpalm_Worker	0	0.166667	0	0.166667	0	0.166667	0	0.166667	0	0.0555556	1	0.0555556	1	0.0555556	0	0.0555556	0	0.0555556	0	0.0555556	0.111111	0.333	No	0
237	Oilpalm_Worker	0	0.166667	0	0.166667	0	0.166667	0	0.166667	0	0.0555556	1	0.0555556	0	0.0555556	0	0.0555556	0	0.0555556	0	0.0555556	0.0555556	0.333	No	0
238	Oilpalm_Worker	0	0.166667	0	0.166667	0	0.166667	0	0.166667	0	0.0555556	1	0.0555556	1	0.0555556	0	0.0555556	0	0.0555556	0	0.0555556	0.111111	0.333	No	0
239	Oilpalm_Worker	0	0.166667	0	0.166667	0	0.166667	0	0.166667	0	0.0555556	1	0.0555556	0	0.0555556	0	0.0555556	0	0.0555556	0	0.0555556	0.0555556	0.333	No	0
240	Oilpalm_Worker	0	0.166667	0	0.166667	0	0.166667	0	0.166667	0	0.0555556	1	0.0555556	0	0.0555556	0	0.0555556	0	0.0555556	0	0.0555556	0.0555556	0.333	No	0
241	Oilpalm_Worker	0	0.166667	0	0.166667	0	0.166667	0	0.166667	0	0.0555556	1	0.0555556	0	0.0555556	0	0.0555556	0	0.0555556	0	0.0555556	0.0555556	0.333	No	0
242	Oilpalm_Worker	0	0.166667	0	0.166667	0	0.166667	0	0.166667	0	0.0555556	1	0.0555556	0	0.0555556	0	0.0555556	0	0.0555556	0	0.0555556	0.0555556	0.333	No	0
243	Oilpalm_Worker	0	0.166667	0	0.166667	0	0.166667	0	0.166667	0	0.0555556	1	0.0555556	0	0.0555556	0	0.0555556	0	0.0555556	0	0.0555556	0.0555556	0.333	No	0
244	Oilpalm_Worker	0	0.166667	0	0.166667	0	0.166667	0	0.166667	1	0.0555556	1	0.0555556	1	0.0555556	0	0.0555556	0	0.0555556	0	0.0555556	0.166667	0.333	No	0
245	Oilpalm_Worker	0	0.166667	0	0.166667	0	0.166667	0	0.166667	0	0.0555556	1	0.0555556	0	0.0555556	0	0.0555556	1	0.0555556	0	0.0555556	0.111111	0.333	No	0
246	Oilpalm_Worker	0	0.166667	0	0.166667	0	0.166667	0	0.166667	1	0.0555556	1	0.0555556	1	0.0555556	0	0.0555556	0	0.0555556	0	0.0555556	0.166667	0.333	No	0
247	Oilpalm_Worker	1	0.166667	0	0.166667	0	0.166667	0	0.166667	0	0.0555556	1	0.0555556	0	0.0555556	0	0.0555556	0	0.0555556	0	0.0555556	0.222222	0.333	No	0
248	Oilpalm_Worker	0	0.166667	0	0.166667	0	0.166667	0	0.166667	1	0.0555556	1	0.0555556	0	0.0555556	0	0.0555556	0	0.0555556	0	0.0555556	0.111111	0.333	No	0
249	Oilpalm_Worker	0	0.166667	0	0.166667	0	0.166667	0	0.166667	1	0.0555556	1	0.0555556	0	0.0555556	0	0.0555556	0	0.0555556	0	0.0555556	0.111111	0.333	No	0
250	Oilpalm_Worker	0	0.166667	0	0.166667	0	0.166667	0	0.166667	0	0.0555556	1	0.0555556	1	0.0555556	0	0.0555556	0	0.0555556	0	0.0555556	0.111111	0.333	No	0
251	Oilpalm_Worker	0	0.166667	0	0.166667	0	0.166667	0	0.166667	0	0.0555556	1	0.0555556	1	0.0555556	0	0.0555556	0	0.0555556	0	0.0555556	0.111111	0.333	No	0
252	Oilpalm_Worker	0	0.166667	0	0.166667	0	0.166667	0	0.166667	0	0.0555556	1	0.0555556	0	0.0555556	0	0.0555556	0	0.0555556	0	0.0555556	0.0555556	0.333	No	0
253	Oilpalm_Worker	0	0.166667	0	0.166667	0	0.166667	0	0.166667	0	0.0555556	1	0.0555556	0	0.0555556	0	0.0555556	0	0.0555556	0	0.0555556	0.0555556	0.333	No	0
254	Oilpalm_Worker	0	0.166667	1	0.166667	0	0.166667	0	0.166667	0	0.0555556	1	0.0555556	0	0.0555556	0	0.0555556	0	0.0555556	0	0.0555556	0.222222	0.333	No	0
255	Oilpalm_Worker	0	0.166667	0	0.166667	0	0.166667	0	0.166667	0	0.0555556	1	0.0555556	1	0.0555556	0	0.0555556	0	0.0555556	0	0.0555556	0.111111	0.333	No	0
256	Oilpalm_Worker	0	0.166667	1	0.166667	0	0.166667	0	0.166667	0	0.0555556	1	0.0555556	0	0.0555556	0	0.0555556	0	0.0555556	0	0.0555556	0.222222	0.333	No	0
257	Oilpalm_Worker	0	0.166667	0	0.166667	0	0.166667	0	0.166667	0	0.0555556	1	0.0555556	0	0.0555556	0	0.0555556	0	0.0555556	0	0.0555556	0.0555556	0.333	No	0
258	Oilpalm_Worker	0	0.166667	0	0.166667	0	0.166667	0	0.166667	0	0.0555556	1	0.0555556	0	0.0555556	0	0.0555556	0	0.0555556	1	0.0555556	0.111111	0.333	No	0
259	Oilpalm_Worker	0	0.166667	1	0.166667	0	0.166667	0	0.166667	0	0.0555556	1	0.0555556	0	0.0555556	0	0.0555556	0	0.0555556	0	0.0555556	0.222222	0.333	No	0
260	Oilpalm_Worker	0	0.166667	0	0.166667	0	0.166667	0	0.166667	0	0.0555556	1	0.0555556	0	0.0555556	0	0.0555556	0	0.0555556	1	0.0555556	0.111111	0.333	No	0
261	Oilpalm_Worker	0	0.166667	0	0.166667	0	0.166667	0	0.166667	0	0.0555556	1	0.0555556	0	0.0555556	0	0.0555556	0	0.0555556	0	0.0555556	0.0555556	0.333	No	0
262	Oilpalm_Worker	0	0.166667	0	0.166667	0	0.166667	0	0.166667	0	0.0555556	1	0.0555556	0	0.0555556	0	0.0555556	0	0.0555556	1	0.0555556	0.111111	0.333	No	0
263	Oilpalm_Worker	0	0.166667	0	0.166667	0	0.166667	0	0.166667	0	0.0555556	1	0.0555556	0	0.0555556	0	0.0555556	0	0.0555556	0	0.0555556	0.0555556	0.333	No	0
264	Oilpalm_Worker	0	0.166667	0	0.166667	0	0.166667	0	0.166667	0	0.0555556	1	0.0555556	0	0.0555556	0	0.0555556	0	0.0555556	0	0.0555556	0.0555556	0.333	No	0
265	Oilpalm_Worker	0	0.166667	0	0.166667	0	0.166667	0	0.166667	0	0.0555556	1	0.0555556	0	0.0555556	0	0.0555556	0	0.0555556	0	0.0555556	0.0555556	0.333	No	0
266	Oilpalm_Worker	0	0.166667	1	0.166667	0	0.166667	0	0.166667	0	0.0555556	1	0.0555556	0	0.0555556	0	0.0555556	0	0.0555556	0	0.0555556	0.222222	0.333	No	0
267	Oilpalm_Worker	0	0.166667	0	0.166667	0	0.166667	0	0.166667	0	0.0555556	1	0.0555556	0	0.0555556	0	0.0555556	0	0.0555556	0	0.0555556	0.0555556	0.333	No	0
268	Oilpalm_Worker	0	0.166667	0	0.166667	0	0.166667	0	0.166667	0	0.0555556	1	0.0555556	0	0.0555556	0	0.0555556	0	0.0555556	0	0.0555556	0.0555556	0.333	No	0
269	Oilpalm_Worker	0	0.166667	0	0.166667	0	0.166667	0	0.166667	0	0.0555556	1	0.0555556	1	0.0555556	0	0.0555556	0	0.0555556	0	0.0555556	0.111111	0.333	No	0
270	Oilpalm_Worker	0	0.166667	0	0.166667	0	0.166667	0	0.166667	0	0.0555556	1	0.0555556	0	0.0555556	0	0.0555556	0	0.0555556	0	0.0555556	0.0555556	0.333	No	0
271	Oilpalm_Worker	0	0.166667	0	0.166667	0	0.166667	1	0.166667	0	0.0555556	1	0.0555556	0	0.0555556	0	0.0555556	0	0.0555556	1	0.0555556	0.277778	0.333	No	0
272	Oilpalm_Worker	0	0.166667	0	0.166667	0	0.166667	1	0.166667	0	0.0555556	1	0.0555556	0	0.0555556	0	0.0555556	0	0.0555556	0	0.0555556	0.222222	0.333	No	0
273	Oilpalm_Worker	0	0.166667	0	0.166667	0	0.166667	0	0.166667	0	0.0555556	0	0.0555556	0	0.0555556	0	0.0555556	0	0.0555556	0	0.0555556	0	0.333	No	0
274	Oilpalm_Worker	0	0.166667	0	0.166667	0	0.166667	0	0.166667	0	0.0555556	1	0.0555556	0	0.0555556	0	0.0555556	0	0.0555556	1	0.0555556	0.111111	0.333	No	0
275	Oilpalm_Worker	0	0.166667	0	0.166667	0	0.166667	1	0.166667	0	0.0555556	1	0.0555556	0	0.0555556	0	0.0555556	0	0.0555556	1	0.0555556	0.277778	0.333	No	0
276	Oilpalm_Worker	0	0.166667	1	0.166667	0	0.166667	1	0.166667	0	0.0555556	1	0.0555556	0	0.0555556	0	0.0555556	0	0.0555556	0	0.0555556	0.388889	0.333	Yes	0.388889
277	Oilpalm_Worker	0	0.166667	0	0.166667	0	0.166667	1	0.166667	0	0.0555556	0	0.0555556	0	0.0555556	0	0.0555556	0	0.0555556	0	0.0555556	0.166667	0.333	No	0
278	Oilpalm_Worker	0	0.166667	0	0.166667	0	0.166667	0	0.166667	1	0.0555556	1	0.0555556	0	0.0555556	0	0.0555556	0	0.0555556	0	0.0555556	0.111111	0.333	No	0
279	Oilpalm_Worker	0	0.166667	0	0.166667	0	0.166667	0	0.166667	0	0.0555556	1	0.0555556	0	0.0555556	0	0.0555556	0	0.0555556	1	0.0555556	0.111111	0.333	No	0
280	Oilpalm_Worker	0	0.166667	0	0.166667	0	0.166667	0	0.166667	0	0.0555556	1	0.0555556	0	0.0555556	0	0.0555556	0	0.0555556	0	0.0555556	0.0555556	0.333	No	0
281	Oilpalm_Worker	0	0.166667	0	0.166667	0	0.166667	0	0.166667	1	0.0555556	1	0.0555556	0	0.0555556	0	0.0555556	0	0.0555556	0	0.0555556	0.111111	0.333	No	0
282	Oilpalm_Worker	1	0.166667	0	0.166667	0	0.166667	1	0.166667	1	0.0555556	1	0.0555556	0	0.0555556	1	0.0555556	0	0.0555556	0	0.0555556	0.5	0.333	Yes	0.5
283	Oilpalm_Worker	0	0.166667	0	0.166667	0	0.166667	0	0.166667	0	0.0555556	1	0.0555556	0	0.0555556	0	0.0555556	0	0.0555556	0	0.0555556	0.0555556	0.333	No	0
284	Oilpalm_Worker	0	0.166667	0	0.166667	0	0.166667	0	0.166667	1	0.0555556	1	0.0555556	0	0.0555556	0	0.0555556	0	0.0555556	0	0.0555556	0.111111	0.333	No	0
285	Oilpalm_Worker	0	0.166667	0	0.166667	0	0.166667	1	0.166667	1	0.0555556	1	0.0555556	0	0.0555556	0	0.0555556	0	0.0555556	1	0.0555556	0.333333	0.333	Yes	0.333333
286	Oilpalm_Worker	0	0.166667	1	0.166667	0	0.166667	0	0.166667	0	0.0555556	1	0.0555556	0	0.0555556	0	0.0555556	0	0.0555556	0	0.0555556	0.222222	0.333	No	0
287	Oilpalm_Worker	0	0.166667	0	0.166667	0	0.166667	0	0.166667	0	0.0555556	1	0.0555556	1	0.0555556	0	0.0555556	1	0.0555556	1	0.0555556	0.222222	0.333	No	0
288	Oilpalm_Worker	0	0.166667	0	0.166667	0	0.166667	0	0.166667	1	0.0555556	1	0.0555556	0	0.0555556	0	0.0555556	0	0.0555556	0	0.0555556	0.111111	0.333	No	0
289	Oilpalm_Worker	0	0.166667	0	0.166667	0	0.166667	0	0.166667	0	0.0555556	1	0.0555556	1	0.0555556	0	0.0555556	1	0.0555556	0	0.0555556	0.166667	0.333	No	0
290	Oilpalm_Worker	0	0.166667	0	0.166667	0	0.166667	0	0.166667	1	0.0555556	1	0.0555556	0	0.0555556	0	0.0555556	1	0.0555556	0	0.0555556	0.166667	0.333	No	0
291	Oilpalm_Worker	0	0.166667	1	0.166667	1	0.166667	0	0.166667	1	0.0555556	1	0.0555556	0	0.0555556	0	0.0555556	1	0.0555556	0	0.0555556	0.5	0.333	Yes	0.5
292	Oilpalm_Worker	0	0.166667	0	0.166667	0	0.166667	0	0.166667	1	0.0555556	1	0.0555556	0	0.0555556	0	0.0555556	0	0.0555556	1	0.0555556	0.166667	0.333	No	0
293	Oilpalm_Worker	0	0.166667	0	0.166667	0	0.166667	1	0.166667	0	0.0555556	0	0.0555556	0	0.0555556	0	0.0555556	0	0.0555556	0	0.0555556	0.166667	0.333	No	0
294	Oilpalm_Worker	0	0.166667	0	0.166667	0	0.166667	0	0.166667	0	0.0555556	1	0.0555556	0	0.0555556	0	0.0555556	0	0.0555556	0	0.0555556	0.0555556	0.333	No	0
295	Oilpalm_Worker	0	0.166667	0	0.166667	0	0.166667	1	0.166667	0	0.0555556	1	0.0555556	1	0.0555556	0	0.0555556	0	0.0555556	0	0.0555556	0.277778	0.333	No	0
296	Oilpalm_Worker	0	0.166667	0	0.166667	0	0.166667	0	0.166667	0	0.0555556	1	0.0555556	0	0.0555556	0	0.0555556	0	0.0555556	1	0.0555556	0.111111	0.333	No	0
297	Oilpalm_Worker	0	0.166667	0	0.166667	0	0.166667	0	0.166667	0	0.0555556	1	0.0555556	0	0.0555556	0	0.0555556	0	0.0555556	1	0.0555556	0.111111	0.333	No	0
298	Oilpalm_Worker	0	0.166667	0	0.166667	0	0.166667	0	0.166667	0	0.0555556	0	0.0555556	0	0.0555556	0	0.0555556	0	0.0555556	1	0.0555556	0.0555556	0.333	No	0
299	Oilpalm_Worker	1	0.166667	0	0.166667	0	0.166667	0	0.166667	1	0.0555556	0	0.0555556	0	0.0555556	1	0.0555556	0	0.0555556	1	0.0555556	0.333333	0.333	Yes	0.333333
300	Oilpalm_Worker	1	0.166667	1	0.166667	0	0.166667	0	0.166667	1	0.0555556	0	0.0555556	0	0.0555556	1	0.0555556	0	0.0555556	1	0.0555556	0.5	0.333	Yes	0.5
301	Oilpalm_Outgrower	0	0.166667	0	0.166667	0	0.166667	0	0.166667	0	0.0555556	1	0.0555556	0	0.0555556	0	0.0555556	1	0.0555556	0	0.0555556	0.111111	0.333	No	0
302	Oilpalm_Outgrower	1	0.166667	1	0.166667	0	0.166667	0	0.166667	0	0.0555556	1	0.0555556	1	0.0555556	0	0.0555556	1	0.0555556	0	0.0555556	0.5	0.333	Yes	0.5
303	Oilpalm_Outgrower	0	0.166667	1	0.166667	0	0.166667	0	0.166667	0	0.0555556	0	0.0555556	1	0.0555556	0	0.0555556	1	0.0555556	0	0.0555556	0.277778	0.333	No	0
304	Oilpalm_Outgrower	0	0.166667	1	0.166667	0	0.166667	0	0.166667	0	0.0555556	1	0.0555556	0	0.0555556	0	0.0555556	1	0.0555556	0	0.0555556	0.277778	0.333	No	0
305	Oilpalm_Outgrower	0	0.166667	0	0.166667	0	0.166667	0	0.166667	0	0.0555556	0	0.0555556	0	0.0555556	0	0.0555556	1	0.0555556	0	0.0555556	0.0555556	0.333	No	0
306	Oilpalm_Outgrower	0	0.166667	0	0.166667	1	0.166667	0	0.166667	0	0.0555556	0	0.0555556	0	0.0555556	0	0.0555556	1	0.0555556	1	0.0555556	0.277778	0.333	No	0
307	Oilpalm_Outgrower	0	0.166667	0	0.166667	1	0.166667	1	0.166667	0	0.0555556	0	0.0555556	1	0.0555556	0	0.0555556	1	0.0555556	0	0.0555556	0.444444	0.333	Yes	0.444444
308	Oilpalm_Outgrower	0	0.166667	0	0.166667	1	0.166667	1	0.166667	0	0.0555556	0	0.0555556	1	0.0555556	0	0.0555556	1	0.0555556	0	0.0555556	0.444444	0.333	Yes	0.444444
309	Oilpalm_Outgrower	0	0.166667	0	0.166667	0	0.166667	0	0.166667	0	0.0555556	0	0.0555556	0	0.0555556	0	0.0555556	1	0.0555556	0	0.0555556	0.0555556	0.333	No	0
310	Oilpalm_Outgrower	0	0.166667	0	0.166667	0	0.166667	0	0.166667	0	0.0555556	0	0.0555556	0	0.0555556	0	0.0555556	1	0.0555556	0	0.0555556	0.0555556	0.333	No	0
311	Oilpalm_Outgrower	0	0.166667	0	0.166667	0	0.166667	0	0.166667	0	0.0555556	0	0.0555556	0	0.0555556	0	0.0555556	1	0.0555556	0	0.0555556	0.0555556	0.333	No	0
312	Oilpalm_Outgrower	0	0.166667	0	0.166667	0	0.166667	0	0.166667	1	0.0555556	0	0.0555556	0	0.0555556	0	0.0555556	1	0.0555556	0	0.0555556	0.111111	0.333	No	0
313	Oilpalm_Outgrower	0	0.166667	0	0.166667	0	0.166667	0	0.166667	0	0.0555556	1	0.0555556	0	0.0555556	0	0.0555556	1	0.0555556	0	0.0555556	0.111111	0.333	No	0
314	Oilpalm_Outgrower	0	0.166667	0	0.166667	0	0.166667	0	0.166667	0	0.0555556	1	0.0555556	0	0.0555556	0	0.0555556	1	0.0555556	0	0.0555556	0.111111	0.333	No	0
315	Oilpalm_Outgrower	0	0.166667	0	0.166667	0	0.166667	0	0.166667	0	0.0555556	0	0.0555556	0	0.0555556	0	0.0555556	1	0.0555556	0	0.0555556	0.0555556	0.333	No	0
316	Oilpalm_Outgrower	0	0.166667	0	0.166667	0	0.166667	0	0.166667	0	0.0555556	0	0.0555556	0	0.0555556	0	0.0555556	1	0.0555556	0	0.0555556	0.0555556	0.333	No	0
317	Oilpalm_Outgrower	0	0.166667	0	0.166667	0	0.166667	0	0.166667	0	0.0555556	0	0.0555556	0	0.0555556	0	0.0555556	1	0.0555556	0	0.0555556	0.0555556	0.333	No	0
318	Oilpalm_Outgrower	0	0.166667	0	0.166667	0	0.166667	0	0.166667	0	0.0555556	0	0.0555556	0	0.0555556	0	0.0555556	1	0.0555556	0	0.0555556	0.0555556	0.333	No	0
319	Oilpalm_Outgrower	0	0.166667	0	0.166667	0	0.166667	0	0.166667	0	0.0555556	0	0.0555556	0	0.0555556	0	0.0555556	1	0.0555556	0	0.0555556	0.0555556	0.333	No	0
320	Oilpalm_Outgrower	0	0.166667	0	0.166667	0	0.166667	0	0.166667	0	0.0555556	0	0.0555556	0	0.0555556	0	0.0555556	0	0.0555556	0	0.0555556	0	0.333	No	0
321	Oilpalm_Outgrower	0	0.166667	1	0.166667	0	0.166667	0	0.166667	0	0.0555556	0	0.0555556	0	0.0555556	0	0.0555556	1	0.0555556	0	0.0555556	0.222222	0.333	No	0
322	Oilpalm_Outgrower	0	0.166667	0	0.166667	0	0.166667	0	0.166667	0	0.0555556	1	0.0555556	0	0.0555556	0	0.0555556	1	0.0555556	0	0.0555556	0.111111	0.333	No	0
323	Oilpalm_Outgrower	0	0.166667	0	0.166667	0	0.166667	0	0.166667	0	0.0555556	0	0.0555556	0	0.0555556	0	0.0555556	1	0.0555556	0	0.0555556	0.0555556	0.333	No	0
324	Oilpalm_Outgrower	0	0.166667	0	0.166667	0	0.166667	0	0.166667	0	0.0555556	1	0.0555556	0	0.0555556	0	0.0555556	1	0.0555556	0	0.0555556	0.111111	0.333	No	0
325	Oilpalm_Outgrower	0	0.166667	0	0.166667	1	0.166667	0	0.166667	0	0.0555556	0	0.0555556	0	0.0555556	0	0.0555556	1	0.0555556	0	0.0555556	0.222222	0.333	No	0
326	Oilpalm_Outgrower	0	0.166667	0	0.166667	0	0.166667	0	0.166667	0	0.0555556	0	0.0555556	0	0.0555556	0	0.0555556	1	0.0555556	0	0.0555556	0.0555556	0.333	No	0
327	Oilpalm_Outgrower	0	0.166667	0	0.166667	0	0.166667	0	0.166667	0	0.0555556	1	0.0555556	0	0.0555556	0	0.0555556	1	0.0555556	0	0.0555556	0.111111	0.333	No	0
328	Oilpalm_Outgrower	0	0.166667	0	0.166667	0	0.166667	0	0.166667	0	0.0555556	1	0.0555556	0	0.0555556	0	0.0555556	1	0.0555556	0	0.0555556	0.111111	0.333	No	0
329	Oilpalm_Outgrower	0	0.166667	0	0.166667	1	0.166667	1	0.166667	0	0.0555556	0	0.0555556	1	0.0555556	0	0.0555556	1	0.0555556	0	0.0555556	0.444444	0.333	Yes	0.444444
330	Oilpalm_Outgrower	0	0.166667	0	0.166667	1	0.166667	1	0.166667	0	0.0555556	0	0.0555556	1	0.0555556	0	0.0555556	1	0.0555556	0	0.0555556	0.444444	0.333	Yes	0.444444
331	Oilpalm_Outgrower	0	0.166667	0	0.166667	0	0.166667	0	0.166667	0	0.0555556	1	0.0555556	0	0.0555556	0	0.0555556	1	0.0555556	0	0.0555556	0.111111	0.333	No	0
332	Oilpalm_Outgrower	0	0.166667	0	0.166667	0	0.166667	0	0.166667	0	0.0555556	1	0.0555556	1	0.0555556	0	0.0555556	1	0.0555556	0	0.0555556	0.166667	0.333	No	0
333	Oilpalm_Outgrower	0	0.166667	0	0.166667	0	0.166667	0	0.166667	0	0.0555556	0	0.0555556	0	0.0555556	0	0.0555556	1	0.0555556	0	0.0555556	0.0555556	0.333	No	0
334	Oilpalm_Outgrower	0	0.166667	0	0.166667	0	0.166667	0	0.166667	0	0.0555556	1	0.0555556	0	0.0555556	0	0.0555556	1	0.0555556	0	0.0555556	0.111111	0.333	No	0
335	Oilpalm_Outgrower	0	0.166667	0	0.166667	0	0.166667	0	0.166667	0	0.0555556	1	0.0555556	1	0.0555556	0	0.0555556	1	0.0555556	0	0.0555556	0.166667	0.333	No	0
336	Oilpalm_Outgrower	0	0.166667	0	0.166667	0	0.166667	0	0.166667	0	0.0555556	0	0.0555556	1	0.0555556	0	0.0555556	1	0.0555556	0	0.0555556	0.111111	0.333	No	0
337	Oilpalm_Outgrower	0	0.166667	0	0.166667	0	0.166667	0	0.166667	0	0.0555556	1	0.0555556	0	0.0555556	0	0.0555556	1	0.0555556	0	0.0555556	0.111111	0.333	No	0
338	Oilpalm_Outgrower	0	0.166667	0	0.166667	0	0.166667	0	0.166667	1	0.0555556	1	0.0555556	0	0.0555556	0	0.0555556	1	0.0555556	0	0.0555556	0.166667	0.333	No	0
339	Oilpalm_Outgrower	0	0.166667	0	0.166667	0	0.166667	0	0.166667	0	0.0555556	0	0.0555556	0	0.0555556	0	0.0555556	1	0.0555556	0	0.0555556	0.0555556	0.333	No	0
340	Oilpalm_Outgrower	0	0.166667	0	0.166667	0	0.166667	0	0.166667	0	0.0555556	0	0.0555556	0	0.0555556	0	0.0555556	1	0.0555556	0	0.0555556	0.0555556	0.333	No	0
341	Oilpalm_Outgrower	0	0.166667	0	0.166667	0	0.166667	0	0.166667	0	0.0555556	1	0.0555556	0	0.0555556	0	0.0555556	1	0.0555556	0	0.0555556	0.111111	0.333	No	0
342	Oilpalm_Outgrower	0	0.166667	0	0.166667	1	0.166667	0	0.166667	0	0.0555556	0	0.0555556	0	0.0555556	0	0.0555556	1	0.0555556	0	0.0555556	0.222222	0.333	No	0
343	Oilpalm_Outgrower	0	0.166667	0	0.166667	0	0.166667	0	0.166667	0	0.0555556	0	0.0555556	0	0.0555556	0	0.0555556	1	0.0555556	0	0.0555556	0.0555556	0.333	No	0
344	Oilpalm_Outgrower	0	0.166667	0	0.166667	0	0.166667	0	0.166667	0	0.0555556	0	0.0555556	0	0.0555556	0	0.0555556	1	0.0555556	0	0.0555556	0.0555556	0.333	No	0
345	Oilpalm_Outgrower	0	0.166667	0	0.166667	0	0.166667	0	0.166667	0	0.0555556	1	0.0555556	1	0.0555556	0	0.0555556	1	0.0555556	0	0.0555556	0.166667	0.333	No	0
346	Oilpalm_Outgrower	0	0.166667	1	0.166667	0	0.166667	0	0.166667	0	0.0555556	1	0.0555556	1	0.0555556	0	0.0555556	1	0.0555556	0	0.0555556	0.333333	0.333	Yes	0.333333
347	Oilpalm_Outgrower	0	0.166667	0	0.166667	0	0.166667	0	0.166667	0	0.0555556	1	0.0555556	1	0.0555556	0	0.0555556	1	0.0555556	0	0.0555556	0.166667	0.333	No	0
348	Oilpalm_Outgrower	0	0.166667	0	0.166667	0	0.166667	0	0.166667	0	0.0555556	1	0.0555556	1	0.0555556	0	0.0555556	1	0.0555556	0	0.0555556	0.166667	0.333	No	0
349	Oilpalm_Outgrower	1	0.166667	0	0.166667	0	0.166667	0	0.166667	0	0.0555556	1	0.0555556	0	0.0555556	0	0.0555556	1	0.0555556	0	0.0555556	0.277778	0.333	No	0
350	Oilpalm_Outgrower	0	0.166667	0	0.166667	0	0.166667	0	0.166667	0	0.0555556	0	0.0555556	0	0.0555556	0	0.0555556	1	0.0555556	0	0.0555556	0.0555556	0.333	No	0
351	Oilpalm_Outgrower	0	0.166667	0	0.166667	0	0.166667	0	0.166667	0	0.0555556	1	0.0555556	0	0.0555556	0	0.0555556	1	0.0555556	0	0.0555556	0.111111	0.333	No	0
352	Oilpalm_Outgrower	1	0.166667	0	0.166667	1	0.166667	0	0.166667	0	0.0555556	0	0.0555556	1	0.0555556	0	0.0555556	1	0.0555556	0	0.0555556	0.444444	0.333	Yes	0.444444
353	Oilpalm_Outgrower	0	0.166667	0	0.166667	0	0.166667	0	0.166667	0	0.0555556	0	0.0555556	0	0.0555556	0	0.0555556	1	0.0555556	0	0.0555556	0.0555556	0.333	No	0
354	Oilpalm_Outgrower	0	0.166667	0	0.166667	0	0.166667	0	0.166667	0	0.0555556	0	0.0555556	0	0.0555556	0	0.0555556	1	0.0555556	0	0.0555556	0.0555556	0.333	No	0
355	Oilpalm_Outgrower	0	0.166667	0	0.166667	0	0.166667	0	0.166667	0	0.0555556	0	0.0555556	0	0.0555556	0	0.0555556	1	0.0555556	0	0.0555556	0.0555556	0.333	No	0
356	Oilpalm_Outgrower	0	0.166667	0	0.166667	0	0.166667	0	0.166667	0	0.0555556	0	0.0555556	0	0.0555556	0	0.0555556	1	0.0555556	0	0.0555556	0.0555556	0.333	No	0
357	Oilpalm_Outgrower	0	0.166667	0	0.166667	0	0.166667	0	0.166667	0	0.0555556	0	0.0555556	0	0.0555556	0	0.0555556	1	0.0555556	0	0.0555556	0.0555556	0.333	No	0
358	Oilpalm_Outgrower	0	0.166667	0	0.166667	1	0.166667	0	0.166667	0	0.0555556	0	0.0555556	1	0.0555556	0	0.0555556	1	0.0555556	0	0.0555556	0.277778	0.333	No	0
359	Oilpalm_Outgrower	0	0.166667	0	0.166667	0	0.166667	0	0.166667	0	0.0555556	0	0.0555556	0	0.0555556	0	0.0555556	1	0.0555556	0	0.0555556	0.0555556	0.333	No	0
360	Oilpalm_Outgrower	0	0.166667	0	0.166667	0	0.166667	0	0.166667	0	0.0555556	0	0.0555556	0	0.0555556	0	0.0555556	1	0.0555556	0	0.0555556	0.0555556	0.333	No	0
361	Oilpalm_Outgrower	0	0.166667	0	0.166667	0	0.166667	0	0.166667	1	0.0555556	1	0.0555556	0	0.0555556	0	0.0555556	1	0.0555556	0	0.0555556	0.166667	0.333	No	0
362	Oilpalm_Outgrower	0	0.166667	0	0.166667	0	0.166667	0	0.166667	0	0.0555556	1	0.0555556	1	0.0555556	0	0.0555556	0	0.0555556	0	0.0555556	0.111111	0.333	No	0
363	Oilpalm_Outgrower	0	0.166667	0	0.166667	0	0.166667	0	0.166667	0	0.0555556	0	0.0555556	0	0.0555556	0	0.0555556	1	0.0555556	0	0.0555556	0.0555556	0.333	No	0
364	Oilpalm_Outgrower	0	0.166667	0	0.166667	0	0.166667	0	0.166667	0	0.0555556	0	0.0555556	0	0.0555556	0	0.0555556	1	0.0555556	0	0.0555556	0.0555556	0.333	No	0
365	Oilpalm_Outgrower	0	0.166667	0	0.166667	0	0.166667	0	0.166667	1	0.0555556	0	0.0555556	0	0.0555556	0	0.0555556	1	0.0555556	0	0.0555556	0.111111	0.333	No	0
366	Oilpalm_Outgrower	0	0.166667	0	0.166667	0	0.166667	0	0.166667	1	0.0555556	0	0.0555556	0	0.0555556	0	0.0555556	1	0.0555556	0	0.0555556	0.111111	0.333	No	0
367	Oilpalm_Outgrower	0	0.166667	0	0.166667	0	0.166667	0	0.166667	1	0.0555556	0	0.0555556	0	0.0555556	0	0.0555556	1	0.0555556	0	0.0555556	0.111111	0.333	No	0
368	Oilpalm_Outgrower	0	0.166667	0	0.166667	0	0.166667	0	0.166667	0	0.0555556	1	0.0555556	1	0.0555556	0	0.0555556	1	0.0555556	0	0.0555556	0.166667	0.333	No	0
369	Oilpalm_Outgrower	0	0.166667	0	0.166667	0	0.166667	0	0.166667	0	0.0555556	1	0.0555556	1	0.0555556	0	0.0555556	1	0.0555556	0	0.0555556	0.166667	0.333	No	0
370	Oilpalm_Outgrower	0	0.166667	0	0.166667	0	0.166667	0	0.166667	0	0.0555556	1	0.0555556	1	0.0555556	0	0.0555556	1	0.0555556	0	0.0555556	0.166667	0.333	No	0
371	Oilpalm_Outgrower	0	0.166667	0	0.166667	0	0.166667	0	0.166667	0	0.0555556	1	0.0555556	0	0.0555556	0	0.0555556	1	0.0555556	0	0.0555556	0.111111	0.333	No	0
372	Oilpalm_Outgrower	0	0.166667	0	0.166667	0	0.166667	0	0.166667	0	0.0555556	1	0.0555556	1	0.0555556	0	0.0555556	1	0.0555556	0	0.0555556	0.166667	0.333	No	0
373	Oilpalm_Outgrower	0	0.166667	0	0.166667	0	0.166667	0	0.166667	0	0.0555556	1	0.0555556	1	0.0555556	0	0.0555556	1	0.0555556	0	0.0555556	0.166667	0.333	No	0
374	Oilpalm_Outgrower	0	0.166667	0	0.166667	0	0.166667	0	0.166667	0	0.0555556	1	0.0555556	1	0.0555556	0	0.0555556	1	0.0555556	0	0.0555556	0.166667	0.333	No	0
375	Oilpalm_Outgrower	1	0.166667	0	0.166667	0	0.166667	0	0.166667	0	0.0555556	1	0.0555556	1	0.0555556	0	0.0555556	1	0.0555556	0	0.0555556	0.333333	0.333	Yes	0.333333
376	Oilpalm_Outgrower	0	0.166667	0	0.166667	1	0.166667	0	0.166667	0	0.0555556	0	0.0555556	1	0.0555556	0	0.0555556	1	0.0555556	0	0.0555556	0.277778	0.333	No	0
377	Oilpalm_Outgrower	0	0.166667	0	0.166667	1	0.166667	0	0.166667	0	0.0555556	0	0.0555556	1	0.0555556	0	0.0555556	1	0.0555556	0	0.0555556	0.277778	0.333	No	0
378	Oilpalm_Outgrower	0	0.166667	1	0.166667	1	0.166667	1	0.166667	0	0.0555556	1	0.0555556	1	0.0555556	1	0.0555556	1	0.0555556	0	0.0555556	0.722222	0.333	Yes	0.722222
379	Oilpalm_Outgrower	0	0.166667	1	0.166667	0	0.166667	0	0.166667	0	0.0555556	0	0.0555556	0	0.0555556	0	0.0555556	1	0.0555556	0	0.0555556	0.222222	0.333	No	0
380	Oilpalm_Outgrower	0	0.166667	0	0.166667	0	0.166667	0	0.166667	0	0.0555556	0	0.0555556	0	0.0555556	0	0.0555556	1	0.0555556	0	0.0555556	0.0555556	0.333	No	0
381	Oilpalm_Outgrower	1	0.166667	0	0.166667	0	0.166667	0	0.166667	0	0.0555556	0	0.0555556	0	0.0555556	0	0.0555556	1	0.0555556	0	0.0555556	0.222222	0.333	No	0
382	Oilpalm_Outgrower	0	0.166667	0	0.166667	0	0.166667	0	0.166667	1	0.0555556	0	0.0555556	0	0.0555556	0	0.0555556	1	0.0555556	0	0.0555556	0.111111	0.333	No	0
383	Oilpalm_Outgrower	0	0.166667	0	0.166667	0	0.166667	0	0.166667	0	0.0555556	1	0.0555556	1	0.0555556	0	0.0555556	1	0.0555556	0	0.0555556	0.166667	0.333	No	0
384	Oilpalm_Outgrower	0	0.166667	1	0.166667	0	0.166667	0	0.166667	0	0.0555556	0	0.0555556	0	0.0555556	0	0.0555556	1	0.0555556	1	0.0555556	0.277778	0.333	No	0
385	Oilpalm_Outgrower	0	0.166667	1	0.166667	1	0.166667	0	0.166667	0	0.0555556	0	0.0555556	0	0.0555556	0	0.0555556	1	0.0555556	0	0.0555556	0.388889	0.333	Yes	0.388889
386	Oilpalm_Outgrower	0	0.166667	0	0.166667	0	0.166667	0	0.166667	0	0.0555556	1	0.0555556	1	0.0555556	0	0.0555556	1	0.0555556	0	0.0555556	0.166667	0.333	No	0
387	Oilpalm_Outgrower	0	0.166667	0	0.166667	0	0.166667	0	0.166667	0	0.0555556	1	0.0555556	1	0.0555556	0	0.0555556	1	0.0555556	0	0.0555556	0.166667	0.333	No	0
388	Oilpalm_Outgrower	0	0.166667	0	0.166667	0	0.166667	0	0.166667	0	0.0555556	1	0.0555556	0	0.0555556	0	0.0555556	1	0.0555556	0	0.0555556	0.111111	0.333	No	0
389	Oilpalm_Outgrower	0	0.166667	0	0.166667	0	0.166667	0	0.166667	0	0.0555556	1	0.0555556	1	0.0555556	0	0.0555556	1	0.0555556	0	0.0555556	0.166667	0.333	No	0
390	Oilpalm_Outgrower	0	0.166667	0	0.166667	0	0.166667	0	0.166667	0	0.0555556	1	0.0555556	1	0.0555556	0	0.0555556	1	0.0555556	0	0.0555556	0.166667	0.333	No	0
391	Oilpalm_Outgrower	0	0.166667	0	0.166667	0	0.166667	0	0.166667	1	0.0555556	1	0.0555556	0	0.0555556	0	0.0555556	1	0.0555556	0	0.0555556	0.166667	0.333	No	0
392	Oilpalm_Outgrower	0	0.166667	0	0.166667	0	0.166667	0	0.166667	0	0.0555556	0	0.0555556	0	0.0555556	0	0.0555556	1	0.0555556	0	0.0555556	0.0555556	0.333	No	0
393	Oilpalm_Outgrower	0	0.166667	0	0.166667	0	0.166667	0	0.166667	0	0.0555556	0	0.0555556	0	0.0555556	0	0.0555556	1	0.0555556	0	0.0555556	0.0555556	0.333	No	0
394	Oilpalm_Outgrower	0	0.166667	0	0.166667	0	0.166667	0	0.166667	0	0.0555556	1	0.0555556	0	0.0555556	0	0.0555556	1	0.0555556	0	0.0555556	0.111111	0.333	No	0
395	Oilpalm_Outgrower	0	0.166667	0	0.166667	0	0.166667	0	0.166667	0	0.0555556	1	0.0555556	0	0.0555556	0	0.0555556	1	0.0555556	0	0.0555556	0.111111	0.333	No	0
396	Oilpalm_Outgrower	0	0.166667	0	0.166667	0	0.166667	0	0.166667	0	0.0555556	1	0.0555556	0	0.0555556	0	0.0555556	1	0.0555556	0	0.0555556	0.111111	0.333	No	0
397	Oilpalm_Outgrower	0	0.166667	0	0.166667	1	0.166667	0	0.166667	0	0.0555556	0	0.0555556	0	0.0555556	0	0.0555556	0	0.0555556	0	0.0555556	0.166667	0.333	No	0
398	Oilpalm_Outgrower	0	0.166667	0	0.166667	0	0.166667	0	0.166667	1	0.0555556	1	0.0555556	0	0.0555556	0	0.0555556	1	0.0555556	0	0.0555556	0.166667	0.333	No	0
399	Oilpalm_Outgrower	0	0.166667	0	0.166667	0	0.166667	0	0.166667	0	0.0555556	1	0.0555556	0	0.0555556	0	0.0555556	1	0.0555556	0	0.0555556	0.111111	0.333	No	0
400	Oilpalm_Outgrower	0	0.166667	0	0.166667	0	0.166667	0	0.166667	0	0.0555556	1	0.0555556	0	0.0555556	0	0.0555556	1	0.0555556	0	0.0555556	0.111111	0.333	No	0
401	Oilpalm_Independent_smallholder	0	0.166667	1	0.166667	1	0.166667	0	0.166667	0	0.0555556	0	0.0555556	0	0.0555556	0	0.0555556	1	0.0555556	0	0.0555556	0.388889	0.333	Yes	0.388889
402	Oilpalm_Independent_smallholder	0	0.166667	0	0.166667	0	0.166667	0	0.166667	0	0.0555556	0	0.0555556	0	0.0555556	0	0.0555556	1	0.0555556	0	0.0555556	0.0555556	0.333	No	0
403	Oilpalm_Independent_smallholder	0	0.166667	0	0.166667	0	0.166667	0	0.166667	0	0.0555556	0	0.0555556	1	0.0555556	0	0.0555556	1	0.0555556	0	0.0555556	0.111111	0.333	No	0
404	Oilpalm_Independent_smallholder	0	0.166667	0	0.166667	1	0.166667	0	0.166667	0	0.0555556	0	0.0555556	1	0.0555556	0	0.0555556	1	0.0555556	0	0.0555556	0.277778	0.333	No	0
405	Oilpalm_Independent_smallholder	0	0.166667	1	0.166667	0	0.166667	0	0.166667	0	0.0555556	1	0.0555556	0	0.0555556	0	0.0555556	1	0.0555556	0	0.0555556	0.277778	0.333	No	0
406	Oilpalm_Independent_smallholder	0	0.166667	0	0.166667	0	0.166667	0	0.166667	0	0.0555556	1	0.0555556	1	0.0555556	0	0.0555556	1	0.0555556	0	0.0555556	0.166667	0.333	No	0
407	Oilpalm_Independent_smallholder	0	0.166667	0	0.166667	0	0.166667	0	0.166667	0	0.0555556	1	0.0555556	0	0.0555556	0	0.0555556	1	0.0555556	0	0.0555556	0.111111	0.333	No	0
408	Oilpalm_Independent_smallholder	0	0.166667	1	0.166667	0	0.166667	0	0.166667	0	0.0555556	1	0.0555556	0	0.0555556	0	0.0555556	1	0.0555556	0	0.0555556	0.277778	0.333	No	0
409	Oilpalm_Independent_smallholder	0	0.166667	0	0.166667	0	0.166667	0	0.166667	0	0.0555556	0	0.0555556	0	0.0555556	0	0.0555556	1	0.0555556	0	0.0555556	0.0555556	0.333	No	0
410	Oilpalm_Independent_smallholder	0	0.166667	0	0.166667	0	0.166667	0	0.166667	0	0.0555556	1	0.0555556	0	0.0555556	0	0.0555556	1	0.0555556	0	0.0555556	0.111111	0.333	No	0
411	Oilpalm_Independent_smallholder	0	0.166667	0	0.166667	0	0.166667	0	0.166667	0	0.0555556	1	0.0555556	0	0.0555556	0	0.0555556	1	0.0555556	0	0.0555556	0.111111	0.333	No	0
412	Oilpalm_Independent_smallholder	0	0.166667	0	0.166667	0	0.166667	0	0.166667	0	0.0555556	1	0.0555556	0	0.0555556	0	0.0555556	1	0.0555556	0	0.0555556	0.111111	0.333	No	0
413	Oilpalm_Independent_smallholder	0	0.166667	0	0.166667	0	0.166667	0	0.166667	0	0.0555556	1	0.0555556	0	0.0555556	0	0.0555556	1	0.0555556	0	0.0555556	0.111111	0.333	No	0
414	Oilpalm_Independent_smallholder	0	0.166667	0	0.166667	0	0.166667	0	0.166667	0	0.0555556	1	0.0555556	0	0.0555556	0	0.0555556	1	0.0555556	0	0.0555556	0.111111	0.333	No	0
415	Oilpalm_Independent_smallholder	0	0.166667	0	0.166667	0	0.166667	0	0.166667	0	0.0555556	0	0.0555556	0	0.0555556	0	0.0555556	1	0.0555556	0	0.0555556	0.0555556	0.333	No	0
416	Oilpalm_Independent_smallholder	0	0.166667	0	0.166667	0	0.166667	0	0.166667	0	0.0555556	0	0.0555556	0	0.0555556	0	0.0555556	1	0.0555556	0	0.0555556	0.0555556	0.333	No	0
417	Oilpalm_Independent_smallholder	0	0.166667	0	0.166667	0	0.166667	0	0.166667	0	0.0555556	0	0.0555556	0	0.0555556	0	0.0555556	1	0.0555556	0	0.0555556	0.0555556	0.333	No	0
418	Oilpalm_Independent_smallholder	0	0.166667	0	0.166667	0	0.166667	0	0.166667	0	0.0555556	1	0.0555556	0	0.0555556	0	0.0555556	1	0.0555556	0	0.0555556	0.111111	0.333	No	0
419	Oilpalm_Independent_smallholder	0	0.166667	0	0.166667	0	0.166667	0	0.166667	0	0.0555556	1	0.0555556	1	0.0555556	0	0.0555556	1	0.0555556	0	0.0555556	0.166667	0.333	No	0
420	Oilpalm_Independent_smallholder	0	0.166667	0	0.166667	0	0.166667	0	0.166667	0	0.0555556	0	0.0555556	0	0.0555556	0	0.0555556	1	0.0555556	0	0.0555556	0.0555556	0.333	No	0
421	Oilpalm_Independent_smallholder	0	0.166667	0	0.166667	0	0.166667	0	0.166667	1	0.0555556	0	0.0555556	1	0.0555556	0	0.0555556	0	0.0555556	0	0.0555556	0.111111	0.333	No	0
422	Oilpalm_Independent_smallholder	0	0.166667	1	0.166667	1	0.166667	0	0.166667	0	0.0555556	1	0.0555556	1	0.0555556	0	0.0555556	1	0.0555556	0	0.0555556	0.5	0.333	Yes	0.5
423	Oilpalm_Independent_smallholder	0	0.166667	1	0.166667	0	0.166667	0	0.166667	0	0.0555556	1	0.0555556	0	0.0555556	0	0.0555556	1	0.0555556	0	0.0555556	0.277778	0.333	No	0
424	Oilpalm_Independent_smallholder	0	0.166667	0	0.166667	1	0.166667	1	0.166667	0	0.0555556	1	0.0555556	0	0.0555556	0	0.0555556	1	0.0555556	0	0.0555556	0.444444	0.333	Yes	0.444444
425	Oilpalm_Independent_smallholder	0	0.166667	0	0.166667	0	0.166667	0	0.166667	0	0.0555556	1	0.0555556	0	0.0555556	0	0.0555556	1	0.0555556	0	0.0555556	0.111111	0.333	No	0
426	Oilpalm_Independent_smallholder	1	0.166667	0	0.166667	1	0.166667	0	0.166667	0	0.0555556	1	0.0555556	0	0.0555556	0	0.0555556	1	0.0555556	0	0.0555556	0.444444	0.333	Yes	0.444444
427	Oilpalm_Independent_smallholder	1	0.166667	0	0.166667	1	0.166667	0	0.166667	1	0.0555556	1	0.0555556	0	0.0555556	0	0.0555556	1	0.0555556	0	0.0555556	0.5	0.333	Yes	0.5
428	Oilpalm_Independent_smallholder	1	0.166667	0	0.166667	1	0.166667	0	0.166667	0	0.0555556	1	0.0555556	0	0.0555556	0	0.0555556	0	0.0555556	0	0.0555556	0.388889	0.333	Yes	0.388889
429	Oilpalm_Independent_smallholder	0	0.166667	0	0.166667	0	0.166667	1	0.166667	0	0.0555556	0	0.0555556	0	0.0555556	0	0.0555556	1	0.0555556	0	0.0555556	0.222222	0.333	No	0
430	Oilpalm_Independent_smallholder	0	0.166667	1	0.166667	0	0.166667	0	0.166667	0	0.0555556	0	0.0555556	0	0.0555556	0	0.0555556	1	0.0555556	0	0.0555556	0.222222	0.333	No	0
431	Oilpalm_Independent_smallholder	0	0.166667	0	0.166667	1	0.166667	0	0.166667	0	0.0555556	1	0.0555556	0	0.0555556	0	0.0555556	1	0.0555556	0	0.0555556	0.277778	0.333	No	0
432	Oilpalm_Independent_smallholder	0	0.166667	1	0.166667	0	0.166667	1	0.166667	0	0.0555556	1	0.0555556	0	0.0555556	0	0.0555556	1	0.0555556	0	0.0555556	0.444444	0.333	Yes	0.444444
433	Oilpalm_Independent_smallholder	0	0.166667	0	0.166667	0	0.166667	0	0.166667	0	0.0555556	0	0.0555556	1	0.0555556	0	0.0555556	1	0.0555556	0	0.0555556	0.111111	0.333	No	0
434	Oilpalm_Independent_smallholder	0	0.166667	1	0.166667	0	0.166667	0	0.166667	0	0.0555556	0	0.0555556	0	0.0555556	0	0.0555556	1	0.0555556	0	0.0555556	0.222222	0.333	No	0
435	Oilpalm_Independent_smallholder	0	0.166667	1	0.166667	0	0.166667	0	0.166667	0	0.0555556	0	0.0555556	1	0.0555556	0	0.0555556	1	0.0555556	0	0.0555556	0.277778	0.333	No	0
436	Oilpalm_Independent_smallholder	0	0.166667	0	0.166667	0	0.166667	0	0.166667	0	0.0555556	0	0.0555556	1	0.0555556	0	0.0555556	1	0.0555556	0	0.0555556	0.111111	0.333	No	0
437	Oilpalm_Independent_smallholder	0	0.166667	0	0.166667	0	0.166667	0	0.166667	0	0.0555556	0	0.0555556	0	0.0555556	0	0.0555556	1	0.0555556	0	0.0555556	0.0555556	0.333	No	0
438	Oilpalm_Independent_smallholder	0	0.166667	0	0.166667	0	0.166667	0	0.166667	0	0.0555556	1	0.0555556	0	0.0555556	0	0.0555556	1	0.0555556	0	0.0555556	0.111111	0.333	No	0
439	Oilpalm_Independent_smallholder	0	0.166667	0	0.166667	0	0.166667	0	0.166667	0	0.0555556	0	0.0555556	0	0.0555556	0	0.0555556	1	0.0555556	0	0.0555556	0.0555556	0.333	No	0
440	Oilpalm_Independent_smallholder	0	0.166667	0	0.166667	1	0.166667	0	0.166667	0	0.0555556	1	0.0555556	0	0.0555556	0	0.0555556	1	0.0555556	0	0.0555556	0.277778	0.333	No	0
441	Oilpalm_Independent_smallholder	0	0.166667	1	0.166667	0	0.166667	0	0.166667	0	0.0555556	0	0.0555556	0	0.0555556	0	0.0555556	1	0.0555556	0	0.0555556	0.222222	0.333	No	0
442	Oilpalm_Independent_smallholder	0	0.166667	0	0.166667	1	0.166667	0	0.166667	1	0.0555556	0	0.0555556	0	0.0555556	0	0.0555556	1	0.0555556	0	0.0555556	0.277778	0.333	No	0
443	Oilpalm_Independent_smallholder	0	0.166667	0	0.166667	1	0.166667	0	0.166667	1	0.0555556	1	0.0555556	0	0.0555556	0	0.0555556	1	0.0555556	0	0.0555556	0.333333	0.333	Yes	0.333333
444	Oilpalm_Independent_smallholder	0	0.166667	0	0.166667	1	0.166667	0	0.166667	1	0.0555556	1	0.0555556	0	0.0555556	0	0.0555556	1	0.0555556	0	0.0555556	0.333333	0.333	Yes	0.333333
445	Oilpalm_Independent_smallholder	0	0.166667	0	0.166667	0	0.166667	0	0.166667	0	0.0555556	1	0.0555556	0	0.0555556	0	0.0555556	1	0.0555556	0	0.0555556	0.111111	0.333	No	0
446	Oilpalm_Independent_smallholder	0	0.166667	0	0.166667	0	0.166667	0	0.166667	0	0.0555556	0	0.0555556	0	0.0555556	0	0.0555556	1	0.0555556	0	0.0555556	0.0555556	0.333	No	0
447	Oilpalm_Independent_smallholder	0	0.166667	0	0.166667	0	0.166667	0	0.166667	0	0.0555556	0	0.0555556	0	0.0555556	0	0.0555556	1	0.0555556	0	0.0555556	0.0555556	0.333	No	0
448	Oilpalm_Independent_smallholder	0	0.166667	0	0.166667	0	0.166667	0	0.166667	0	0.0555556	0	0.0555556	0	0.0555556	0	0.0555556	1	0.0555556	0	0.0555556	0.0555556	0.333	No	0
449	Oilpalm_Independent_smallholder	1	0.166667	0	0.166667	0	0.166667	0	0.166667	0	0.0555556	0	0.0555556	0	0.0555556	0	0.0555556	1	0.0555556	0	0.0555556	0.222222	0.333	No	0
450	Oilpalm_Independent_smallholder	0	0.166667	0	0.166667	0	0.166667	0	0.166667	0	0.0555556	0	0.0555556	0	0.0555556	0	0.0555556	1	0.0555556	0	0.0555556	0.0555556	0.333	No	0
451	Oilpalm_Independent_smallholder	0	0.166667	0	0.166667	0	0.166667	0	0.166667	0	0.0555556	0	0.0555556	0	0.0555556	0	0.0555556	1	0.0555556	0	0.0555556	0.0555556	0.333	No	0
452	Oilpalm_Independent_smallholder	0	0.166667	1	0.166667	0	0.166667	0	0.166667	0	0.0555556	0	0.0555556	0	0.0555556	0	0.0555556	1	0.0555556	0	0.0555556	0.222222	0.333	No	0
453	Oilpalm_Independent_smallholder	0	0.166667	1	0.166667	0	0.166667	0	0.166667	1	0.0555556	1	0.0555556	0	0.0555556	0	0.0555556	1	0.0555556	0	0.0555556	0.333333	0.333	Yes	0.333333
454	Oilpalm_Independent_smallholder	0	0.166667	0	0.166667	0	0.166667	1	0.166667	1	0.0555556	1	0.0555556	0	0.0555556	0	0.0555556	1	0.0555556	0	0.0555556	0.333333	0.333	Yes	0.333333
455	Oilpalm_Independent_smallholder	0	0.166667	0	0.166667	0	0.166667	0	0.166667	1	0.0555556	1	0.0555556	0	0.0555556	0	0.0555556	1	0.0555556	0	0.0555556	0.166667	0.333	No	0
456	Oilpalm_Independent_smallholder	0	0.166667	0	0.166667	0	0.166667	0	0.166667	1	0.0555556	1	0.0555556	0	0.0555556	0	0.0555556	1	0.0555556	0	0.0555556	0.166667	0.333	No	0
457	Oilpalm_Independent_smallholder	0	0.166667	0	0.166667	0	0.166667	1	0.166667	1	0.0555556	1	0.0555556	0	0.0555556	0	0.0555556	1	0.0555556	0	0.0555556	0.333333	0.333	Yes	0.333333
458	Oilpalm_Independent_smallholder	0	0.166667	0	0.166667	0	0.166667	0	0.166667	0	0.0555556	0	0.0555556	0	0.0555556	0	0.0555556	1	0.0555556	0	0.0555556	0.0555556	0.333	No	0
459	Oilpalm_Independent_smallholder	0	0.166667	0	0.166667	0	0.166667	0	0.166667	0	0.0555556	0	0.0555556	0	0.0555556	0	0.0555556	1	0.0555556	0	0.0555556	0.0555556	0.333	No	0
460	Oilpalm_Independent_smallholder	0	0.166667	1	0.166667	0	0.166667	0	0.166667	0	0.0555556	0	0.0555556	0	0.0555556	0	0.0555556	1	0.0555556	0	0.0555556	0.222222	0.333	No	0
461	Oilpalm_Independent_smallholder	0	0.166667	1	0.166667	1	0.166667	0	0.166667	0	0.0555556	1	0.0555556	0	0.0555556	0	0.0555556	1	0.0555556	0	0.0555556	0.444444	0.333	Yes	0.444444
462	Oilpalm_Independent_smallholder	0	0.166667	0	0.166667	0	0.166667	0	0.166667	0	0.0555556	0	0.0555556	1	0.0555556	0	0.0555556	1	0.0555556	0	0.0555556	0.111111	0.333	No	0
463	Oilpalm_Independent_smallholder	0	0.166667	0	0.166667	0	0.166667	0	0.166667	0	0.0555556	0	0.0555556	1	0.0555556	0	0.0555556	1	0.0555556	0	0.0555556	0.111111	0.333	No	0
464	Oilpalm_Independent_smallholder	0	0.166667	0	0.166667	1	0.166667	0	0.166667	0	0.0555556	0	0.0555556	1	0.0555556	0	0.0555556	1	0.0555556	0	0.0555556	0.277778	0.333	No	0
465	Oilpalm_Independent_smallholder	0	0.166667	0	0.166667	0	0.166667	0	0.166667	0	0.0555556	0	0.0555556	1	0.0555556	0	0.0555556	1	0.0555556	0	0.0555556	0.111111	0.333	No	0
466	Oilpalm_Independent_smallholder	0	0.166667	0	0.166667	0	0.166667	0	0.166667	0	0.0555556	1	0.0555556	0	0.0555556	0	0.0555556	0	0.0555556	0	0.0555556	0.0555556	0.333	No	0
467	Oilpalm_Independent_smallholder	0	0.166667	0	0.166667	0	0.166667	0	0.166667	0	0.0555556	1	0.0555556	0	0.0555556	0	0.0555556	1	0.0555556	0	0.0555556	0.111111	0.333	No	0
468	Oilpalm_Independent_smallholder	0	0.166667	0	0.166667	0	0.166667	0	0.166667	0	0.0555556	1	0.0555556	0	0.0555556	0	0.0555556	0	0.0555556	0	0.0555556	0.0555556	0.333	No	0
469	Oilpalm_Independent_smallholder	0	0.166667	0	0.166667	0	0.166667	0	0.166667	0	0.0555556	1	0.0555556	0	0.0555556	0	0.0555556	1	0.0555556	0	0.0555556	0.111111	0.333	No	0
470	Oilpalm_Independent_smallholder	0	0.166667	0	0.166667	0	0.166667	0	0.166667	0	0.0555556	1	0.0555556	0	0.0555556	0	0.0555556	1	0.0555556	0	0.0555556	0.111111	0.333	No	0
471	Oilpalm_Independent_smallholder	0	0.166667	0	0.166667	0	0.166667	0	0.166667	0	0.0555556	0	0.0555556	1	0.0555556	0	0.0555556	1	0.0555556	0	0.0555556	0.111111	0.333	No	0
472	Oilpalm_Independent_smallholder	0	0.166667	0	0.166667	0	0.166667	0	0.166667	0	0.0555556	1	0.0555556	1	0.0555556	1	0.0555556	1	0.0555556	0	0.0555556	0.222222	0.333	No	0
473	Oilpalm_Independent_smallholder	0	0.166667	0	0.166667	0	0.166667	0	0.166667	0	0.0555556	0	0.0555556	0	0.0555556	0	0.0555556	0	0.0555556	0	0.0555556	0	0.333	No	0
474	Oilpalm_Independent_smallholder	0	0.166667	0	0.166667	0	0.166667	0	0.166667	0	0.0555556	1	0.0555556	0	0.0555556	0	0.0555556	0	0.0555556	0	0.0555556	0.0555556	0.333	No	0
475	Oilpalm_Independent_smallholder	0	0.166667	0	0.166667	0	0.166667	0	0.166667	0	0.0555556	1	0.0555556	1	0.0555556	0	0.0555556	1	0.0555556	0	0.0555556	0.166667	0.333	No	0
476	Oilpalm_Independent_smallholder	0	0.166667	0	0.166667	0	0.166667	0	0.166667	0	0.0555556	1	0.0555556	0	0.0555556	0	0.0555556	1	0.0555556	0	0.0555556	0.111111	0.333	No	0
477	Oilpalm_Independent_smallholder	0	0.166667	0	0.166667	0	0.166667	0	0.166667	0	0.0555556	1	0.0555556	1	0.0555556	0	0.0555556	1	0.0555556	0	0.0555556	0.166667	0.333	No	0
478	Oilpalm_Independent_smallholder	0	0.166667	0	0.166667	0	0.166667	0	0.166667	0	0.0555556	1	0.0555556	1	0.0555556	0	0.0555556	1	0.0555556	0	0.0555556	0.166667	0.333	No	0
479	Oilpalm_Independent_smallholder	0	0.166667	0	0.166667	0	0.166667	0	0.166667	0	0.0555556	1	0.0555556	0	0.0555556	0	0.0555556	1	0.0555556	0	0.0555556	0.111111	0.333	No	0
480	Oilpalm_Independent_smallholder	0	0.166667	0	0.166667	0	0.166667	0	0.166667	0	0.0555556	0	0.0555556	1	0.0555556	0	0.0555556	1	0.0555556	0	0.0555556	0.111111	0.333	No	0
481	Oilpalm_Independent_smallholder	0	0.166667	0	0.166667	0	0.166667	0	0.166667	0	0.0555556	0	0.0555556	0	0.0555556	0	0.0555556	1	0.0555556	0	0.0555556	0.0555556	0.333	No	0
482	Oilpalm_Independent_smallholder	0	0.166667	0	0.166667	0	0.166667	0	0.166667	0	0.0555556	1	0.0555556	0	0.0555556	0	0.0555556	1	0.0555556	1	0.0555556	0.166667	0.333	No	0
483	Oilpalm_Independent_smallholder	0	0.166667	0	0.166667	0	0.166667	0	0.166667	0	0.0555556	0	0.0555556	0	0.0555556	0	0.0555556	1	0.0555556	0	0.0555556	0.0555556	0.333	No	0
484	Oilpalm_Independent_smallholder	0	0.166667	0	0.166667	0	0.166667	0	0.166667	1	0.0555556	0	0.0555556	0	0.0555556	0	0.0555556	1	0.0555556	0	0.0555556	0.111111	0.333	No	0
485	Oilpalm_Independent_smallholder	0	0.166667	0	0.166667	0	0.166667	0	0.166667	0	0.0555556	1	0.0555556	0	0.0555556	0	0.0555556	1	0.0555556	0	0.0555556	0.111111	0.333	No	0
486	Oilpalm_Independent_smallholder	0	0.166667	0	0.166667	1	0.166667	0	0.166667	0	0.0555556	1	0.0555556	0	0.0555556	0	0.0555556	1	0.0555556	0	0.0555556	0.277778	0.333	No	0
487	Oilpalm_Independent_smallholder	1	0.166667	0	0.166667	1	0.166667	0	0.166667	0	0.0555556	1	0.0555556	0	0.0555556	0	0.0555556	1	0.0555556	0	0.0555556	0.444444	0.333	Yes	0.444444
488	Oilpalm_Independent_smallholder	0	0.166667	0	0.166667	1	0.166667	0	0.166667	0	0.0555556	1	0.0555556	0	0.0555556	0	0.0555556	1	0.0555556	0	0.0555556	0.277778	0.333	No	0
489	Oilpalm_Independent_smallholder	0	0.166667	0	0.166667	1	0.166667	1	0.166667	0	0.0555556	1	0.0555556	0	0.0555556	0	0.0555556	1	0.0555556	0	0.0555556	0.444444	0.333	Yes	0.444444
490	Oilpalm_Independent_smallholder	0	0.166667	1	0.166667	1	0.166667	1	0.166667	0	0.0555556	1	0.0555556	0	0.0555556	0	0.0555556	1	0.0555556	0	0.0555556	0.611111	0.333	Yes	0.611111
491	Oilpalm_Independent_smallholder	0	0.166667	0	0.166667	0	0.166667	0	0.166667	0	0.0555556	1	0.0555556	0	0.0555556	0	0.0555556	1	0.0555556	0	0.0555556	0.111111	0.333	No	0
492	Oilpalm_Independent_smallholder	0	0.166667	0	0.166667	1	0.166667	0	0.166667	0	0.0555556	0	0.0555556	1	0.0555556	0	0.0555556	1	0.0555556	0	0.0555556	0.277778	0.333	No	0
493	Oilpalm_Independent_smallholder	0	0.166667	0	0.166667	0	0.166667	1	0.166667	1	0.0555556	1	0.0555556	0	0.0555556	0	0.0555556	0	0.0555556	0	0.0555556	0.277778	0.333	No	0
494	Oilpalm_Independent_smallholder	0	0.166667	1	0.166667	0	0.166667	1	0.166667	0	0.0555556	1	0.0555556	0	0.0555556	0	0.0555556	1	0.0555556	0	0.0555556	0.444444	0.333	Yes	0.444444
495	Oilpalm_Independent_smallholder	0	0.166667	0	0.166667	1	0.166667	1	0.166667	0	0.0555556	0	0.0555556	0	0.0555556	0	0.0555556	1	0.0555556	0	0.0555556	0.388889	0.333	Yes	0.388889
496	Oilpalm_Independent_smallholder	0	0.166667	0	0.166667	0	0.166667	0	0.166667	0	0.0555556	1	0.0555556	0	0.0555556	0	0.0555556	1	0.0555556	0	0.0555556	0.111111	0.333	No	0
497	Oilpalm_Independent_smallholder	1	0.166667	0	0.166667	1	0.166667	1	0.166667	0	0.0555556	0	0.0555556	0	0.0555556	1	0.0555556	1	0.0555556	0	0.0555556	0.611111	0.333	Yes	0.611111
498	Oilpalm_Independent_smallholder	0	0.166667	0	0.166667	1	0.166667	0	0.166667	0	0.0555556	1	0.0555556	0	0.0555556	0	0.0555556	1	0.0555556	0	0.0555556	0.277778	0.333	No	0
499	Oilpalm_Independent_smallholder	1	0.166667	1	0.166667	1	0.166667	1	0.166667	0	0.0555556	0	0.0555556	0	0.0555556	1	0.0555556	0	0.0555556	1	0.0555556	0.777778	0.333	Yes	0.777778
500	Oilpalm_Independent_smallholder	1	0.166667	1	0.166667	1	0.166667	0	0.166667	0	0.0555556	0	0.0555556	0	0.0555556	1	0.0555556	0	0.0555556	1	0.0555556	0.611111	0.333	Yes	0.611111
501	Oilpalm_Control	0	0.166667	0	0.166667	0	0.166667	0	0.166667	0	0.0555556	1	0.0555556	0	0.0555556	0	0.0555556	1	0.0555556	0	0.0555556	0.111111	0.333	No	0
502	Oilpalm_Control	1	0.166667	0	0.166667	0	0.166667	1	0.166667	0	0.0555556	1	0.0555556	0	0.0555556	0	0.0555556	1	0.0555556	0	0.0555556	0.444444	0.333	Yes	0.444444
503	Oilpalm_Control	0	0.166667	1	0.166667	0	0.166667	0	0.166667	0	0.0555556	1	0.0555556	0	0.0555556	0	0.0555556	1	0.0555556	0	0.0555556	0.277778	0.333	No	0
504	Oilpalm_Control	0	0.166667	1	0.166667	0	0.166667	0	0.166667	0	0.0555556	1	0.0555556	0	0.0555556	1	0.0555556	1	0.0555556	0	0.0555556	0.333333	0.333	Yes	0.333333
505	Oilpalm_Control	0	0.166667	0	0.166667	0	0.166667	0	0.166667	0	0.0555556	0	0.0555556	0	0.0555556	0	0.0555556	1	0.0555556	0	0.0555556	0.0555556	0.333	No	0
506	Oilpalm_Control	0	0.166667	0	0.166667	0	0.166667	0	0.166667	0	0.0555556	1	0.0555556	0	0.0555556	0	0.0555556	1	0.0555556	0	0.0555556	0.111111	0.333	No	0
507	Oilpalm_Control	0	0.166667	0	0.166667	0	0.166667	0	0.166667	0	0.0555556	1	0.0555556	0	0.0555556	0	0.0555556	1	0.0555556	0	0.0555556	0.111111	0.333	No	0
508	Oilpalm_Control	0	0.166667	0	0.166667	0	0.166667	1	0.166667	0	0.0555556	0	0.0555556	0	0.0555556	0	0.0555556	1	0.0555556	0	0.0555556	0.222222	0.333	No	0
509	Oilpalm_Control	0	0.166667	0	0.166667	1	0.166667	0	0.166667	0	0.0555556	1	0.0555556	0	0.0555556	0	0.0555556	1	0.0555556	0	0.0555556	0.277778	0.333	No	0
510	Oilpalm_Control	0	0.166667	0	0.166667	0	0.166667	0	0.166667	0	0.0555556	1	0.0555556	0	0.0555556	0	0.0555556	1	0.0555556	0	0.0555556	0.111111	0.333	No	0
511	Oilpalm_Control	0	0.166667	0	0.166667	0	0.166667	1	0.166667	0	0.0555556	0	0.0555556	0	0.0555556	0	0.0555556	1	0.0555556	0	0.0555556	0.222222	0.333	No	0
512	Oilpalm_Control	0	0.166667	0	0.166667	0	0.166667	1	0.166667	0	0.0555556	1	0.0555556	1	0.0555556	0	0.0555556	1	0.0555556	0	0.0555556	0.333333	0.333	Yes	0.333333
513	Oilpalm_Control	0	0.166667	0	0.166667	0	0.166667	0	0.166667	0	0.0555556	0	0.0555556	1	0.0555556	0	0.0555556	1	0.0555556	0	0.0555556	0.111111	0.333	No	0
514	Oilpalm_Control	0	0.166667	0	0.166667	0	0.166667	0	0.166667	0	0.0555556	1	0.0555556	0	0.0555556	0	0.0555556	0	0.0555556	0	0.0555556	0.0555556	0.333	No	0
515	Oilpalm_Control	0	0.166667	0	0.166667	0	0.166667	0	0.166667	0	0.0555556	1	0.0555556	0	0.0555556	0	0.0555556	1	0.0555556	0	0.0555556	0.111111	0.333	No	0
516	Oilpalm_Control	0	0.166667	0	0.166667	0	0.166667	0	0.166667	1	0.0555556	1	0.0555556	1	0.0555556	1	0.0555556	1	0.0555556	0	0.0555556	0.277778	0.333	No	0
517	Oilpalm_Control	0	0.166667	0	0.166667	0	0.166667	0	0.166667	0	0.0555556	1	0.0555556	0	0.0555556	0	0.0555556	1	0.0555556	0	0.0555556	0.111111	0.333	No	0
518	Oilpalm_Control	0	0.166667	0	0.166667	0	0.166667	0	0.166667	0	0.0555556	1	0.0555556	0	0.0555556	0	0.0555556	1	0.0555556	0	0.0555556	0.111111	0.333	No	0
519	Oilpalm_Control	0	0.166667	0	0.166667	0	0.166667	0	0.166667	0	0.0555556	1	0.0555556	0	0.0555556	0	0.0555556	1	0.0555556	0	0.0555556	0.111111	0.333	No	0
520	Oilpalm_Control	0	0.166667	0	0.166667	1	0.166667	0	0.166667	0	0.0555556	1	0.0555556	0	0.0555556	0	0.0555556	1	0.0555556	0	0.0555556	0.277778	0.333	No	0
521	Oilpalm_Control	0	0.166667	0	0.166667	0	0.166667	0	0.166667	0	0.0555556	1	0.0555556	1	0.0555556	0	0.0555556	1	0.0555556	0	0.0555556	0.166667	0.333	No	0
522	Oilpalm_Control	0	0.166667	1	0.166667	0	0.166667	0	0.166667	0	0.0555556	1	0.0555556	1	0.0555556	0	0.0555556	1	0.0555556	0	0.0555556	0.333333	0.333	Yes	0.333333
523	Oilpalm_Control	0	0.166667	0	0.166667	0	0.166667	1	0.166667	0	0.0555556	1	0.0555556	1	0.0555556	0	0.0555556	1	0.0555556	0	0.0555556	0.333333	0.333	Yes	0.333333
524	Oilpalm_Control	0	0.166667	0	0.166667	0	0.166667	0	0.166667	0	0.0555556	0	0.0555556	1	0.0555556	0	0.0555556	1	0.0555556	0	0.0555556	0.111111	0.333	No	0
525	Oilpalm_Control	0	0.166667	0	0.166667	0	0.166667	1	0.166667	1	0.0555556	1	0.0555556	0	0.0555556	0	0.0555556	1	0.0555556	0	0.0555556	0.333333	0.333	Yes	0.333333
526	Oilpalm_Control	0	0.166667	0	0.166667	1	0.166667	0	0.166667	0	0.0555556	1	0.0555556	0	0.0555556	0	0.0555556	1	0.0555556	0	0.0555556	0.277778	0.333	No	0
527	Oilpalm_Control	0	0.166667	0	0.166667	0	0.166667	0	0.166667	0	0.0555556	1	0.0555556	0	0.0555556	0	0.0555556	1	0.0555556	0	0.0555556	0.111111	0.333	No	0
528	Oilpalm_Control	0	0.166667	1	0.166667	0	0.166667	0	0.166667	1	0.0555556	1	0.0555556	0	0.0555556	0	0.0555556	1	0.0555556	0	0.0555556	0.333333	0.333	Yes	0.333333
529	Oilpalm_Control	0	0.166667	0	0.166667	0	0.166667	0	0.166667	0	0.0555556	0	0.0555556	0	0.0555556	0	0.0555556	1	0.0555556	0	0.0555556	0.0555556	0.333	No	0
530	Oilpalm_Control	0	0.166667	0	0.166667	0	0.166667	0	0.166667	0	0.0555556	1	0.0555556	0	0.0555556	0	0.0555556	1	0.0555556	0	0.0555556	0.111111	0.333	No	0
531	Oilpalm_Control	0	0.166667	0	0.166667	0	0.166667	0	0.166667	0	0.0555556	1	0.0555556	0	0.0555556	0	0.0555556	1	0.0555556	0	0.0555556	0.111111	0.333	No	0
532	Oilpalm_Control	0	0.166667	0	0.166667	0	0.166667	0	0.166667	0	0.0555556	0	0.0555556	0	0.0555556	0	0.0555556	1	0.0555556	0	0.0555556	0.0555556	0.333	No	0
533	Oilpalm_Control	1	0.166667	0	0.166667	0	0.166667	0	0.166667	0	0.0555556	1	0.0555556	0	0.0555556	0	0.0555556	1	0.0555556	0	0.0555556	0.277778	0.333	No	0
534	Oilpalm_Control	1	0.166667	1	0.166667	0	0.166667	0	0.166667	0	0.0555556	1	0.0555556	0	0.0555556	0	0.0555556	1	0.0555556	0	0.0555556	0.444444	0.333	Yes	0.444444
535	Oilpalm_Control	0	0.166667	0	0.166667	1	0.166667	0	0.166667	0	0.0555556	1	0.0555556	0	0.0555556	0	0.0555556	1	0.0555556	0	0.0555556	0.277778	0.333	No	0
536	Oilpalm_Control	1	0.166667	0	0.166667	0	0.166667	0	0.166667	0	0.0555556	1	0.0555556	0	0.0555556	0	0.0555556	1	0.0555556	0	0.0555556	0.277778	0.333	No	0
537	Oilpalm_Control	0	0.166667	0	0.166667	0	0.166667	0	0.166667	0	0.0555556	1	0.0555556	0	0.0555556	0	0.0555556	1	0.0555556	0	0.0555556	0.111111	0.333	No	0
538	Oilpalm_Control	0	0.166667	0	0.166667	0	0.166667	0	0.166667	1	0.0555556	1	0.0555556	0	0.0555556	0	0.0555556	1	0.0555556	1	0.0555556	0.222222	0.333	No	0
539	Oilpalm_Control	0	0.166667	0	0.166667	0	0.166667	0	0.166667	0	0.0555556	1	0.0555556	0	0.0555556	0	0.0555556	1	0.0555556	0	0.0555556	0.111111	0.333	No	0
540	Oilpalm_Control	0	0.166667	0	0.166667	0	0.166667	0	0.166667	1	0.0555556	1	0.0555556	0	0.0555556	0	0.0555556	1	0.0555556	0	0.0555556	0.166667	0.333	No	0
541	Oilpalm_Control	0	0.166667	0	0.166667	0	0.166667	0	0.166667	0	0.0555556	1	0.0555556	0	0.0555556	0	0.0555556	1	0.0555556	0	0.0555556	0.111111	0.333	No	0
542	Oilpalm_Control	0	0.166667	0	0.166667	0	0.166667	0	0.166667	0	0.0555556	1	0.0555556	1	0.0555556	0	0.0555556	1	0.0555556	0	0.0555556	0.166667	0.333	No	0
543	Oilpalm_Control	0	0.166667	0	0.166667	0	0.166667	0	0.166667	0	0.0555556	1	0.0555556	1	0.0555556	0	0.0555556	1	0.0555556	0	0.0555556	0.166667	0.333	No	0
544	Oilpalm_Control	0	0.166667	0	0.166667	0	0.166667	0	0.166667	0	0.0555556	1	0.0555556	0	0.0555556	0	0.0555556	1	0.0555556	0	0.0555556	0.111111	0.333	No	0
545	Oilpalm_Control	0	0.166667	0	0.166667	0	0.166667	0	0.166667	0	0.0555556	1	0.0555556	0	0.0555556	0	0.0555556	1	0.0555556	0	0.0555556	0.111111	0.333	No	0
546	Oilpalm_Control	0	0.166667	0	0.166667	0	0.166667	0	0.166667	0	0.0555556	0	0.0555556	1	0.0555556	0	0.0555556	0	0.0555556	0	0.0555556	0.0555556	0.333	No	0
547	Oilpalm_Control	0	0.166667	0	0.166667	0	0.166667	0	0.166667	1	0.0555556	0	0.0555556	1	0.0555556	0	0.0555556	1	0.0555556	0	0.0555556	0.166667	0.333	No	0
548	Oilpalm_Control	0	0.166667	0	0.166667	0	0.166667	0	0.166667	1	0.0555556	0	0.0555556	0	0.0555556	0	0.0555556	1	0.0555556	0	0.0555556	0.111111	0.333	No	0
549	Oilpalm_Control	0	0.166667	0	0.166667	3	0.166667	0	0.166667	1	0.0555556	1	0.0555556	1	0.0555556	0	0.0555556	0	0.0555556	0	0.0555556	0.666667	0.333	Yes	0.666667
550	Oilpalm_Control	0	0.166667	0	0.166667	0	0.166667	0	0.166667	1	0.0555556	0	0.0555556	1	0.0555556	0	0.0555556	0	0.0555556	0	0.0555556	0.111111	0.333	No	0
551	Oilpalm_Control	0	0.166667	0	0.166667	0	0.166667	0	0.166667	0	0.0555556	1	0.0555556	0	0.0555556	0	0.0555556	0	0.0555556	0	0.0555556	0.0555556	0.333	No	0
552	Oilpalm_Control	0	0.166667	1	0.166667	1	0.166667	0	0.166667	0	0.0555556	1	0.0555556	0	0.0555556	0	0.0555556	1	0.0555556	0	0.0555556	0.444444	0.333	Yes	0.444444
553	Oilpalm_Control	0	0.166667	0	0.166667	0	0.166667	0	0.166667	1	0.0555556	1	0.0555556	0	0.0555556	0	0.0555556	0	0.0555556	0	0.0555556	0.111111	0.333	No	0
554	Oilpalm_Control	0	0.166667	0	0.166667	0	0.166667	0	0.166667	0	0.0555556	1	0.0555556	0	0.0555556	0	0.0555556	1	0.0555556	0	0.0555556	0.111111	0.333	No	0
555	Oilpalm_Control	0	0.166667	0	0.166667	0	0.166667	0	0.166667	0	0.0555556	1	0.0555556	0	0.0555556	0	0.0555556	1	0.0555556	0	0.0555556	0.111111	0.333	No	0
556	Oilpalm_Control	0	0.166667	0	0.166667	0	0.166667	0	0.166667	0	0.0555556	1	0.0555556	0	0.0555556	0	0.0555556	0	0.0555556	0	0.0555556	0.0555556	0.333	No	0
557	Oilpalm_Control	0	0.166667	0	0.166667	0	0.166667	0	0.166667	1	0.0555556	1	0.0555556	0	0.0555556	0	0.0555556	1	0.0555556	0	0.0555556	0.166667	0.333	No	0
558	Oilpalm_Control	0	0.166667	0	0.166667	0	0.166667	0	0.166667	1	0.0555556	0	0.0555556	0	0.0555556	0	0.0555556	0	0.0555556	0	0.0555556	0.0555556	0.333	No	0
559	Oilpalm_Control	0	0.166667	0	0.166667	0	0.166667	1	0.166667	1	0.0555556	1	0.0555556	1	0.0555556	0	0.0555556	0	0.0555556	0	0.0555556	0.333333	0.333	Yes	0.333333
560	Oilpalm_Control	0	0.166667	0	0.166667	0	0.166667	0	0.166667	1	0.0555556	0	0.0555556	0	0.0555556	0	0.0555556	0	0.0555556	0	0.0555556	0.0555556	0.333	No	0
561	Oilpalm_Control	0	0.166667	0	0.166667	0	0.166667	0	0.166667	0	0.0555556	1	0.0555556	0	0.0555556	0	0.0555556	0	0.0555556	0	0.0555556	0.0555556	0.333	No	0
562	Oilpalm_Control	0	0.166667	0	0.166667	1	0.166667	1	0.166667	0	0.0555556	0	0.0555556	0	0.0555556	0	0.0555556	1	0.0555556	0	0.0555556	0.388889	0.333	Yes	0.388889
563	Oilpalm_Control	0	0.166667	0	0.166667	0	0.166667	0	0.166667	0	0.0555556	1	0.0555556	0	0.0555556	0	0.0555556	1	0.0555556	0	0.0555556	0.111111	0.333	No	0
564	Oilpalm_Control	0	0.166667	0	0.166667	1	0.166667	0	0.166667	0	0.0555556	1	0.0555556	0	0.0555556	0	0.0555556	0	0.0555556	0	0.0555556	0.222222	0.333	No	0
565	Oilpalm_Control	0	0.166667	0	0.166667	0	0.166667	0	0.166667	0	0.0555556	0	0.0555556	0	0.0555556	0	0.0555556	1	0.0555556	0	0.0555556	0.0555556	0.333	No	0
566	Oilpalm_Control	0	0.166667	0	0.166667	0	0.166667	0	0.166667	0	0.0555556	1	0.0555556	0	0.0555556	0	0.0555556	1	0.0555556	0	0.0555556	0.111111	0.333	No	0
567	Oilpalm_Control	0	0.166667	0	0.166667	0	0.166667	0	0.166667	0	0.0555556	1	0.0555556	0	0.0555556	0	0.0555556	0	0.0555556	0	0.0555556	0.0555556	0.333	No	0
568	Oilpalm_Control	0	0.166667	0	0.166667	1	0.166667	0	0.166667	1	0.0555556	0	0.0555556	0	0.0555556	0	0.0555556	1	0.0555556	0	0.0555556	0.277778	0.333	No	0
569	Oilpalm_Control	0	0.166667	0	0.166667	0	0.166667	0	0.166667	1	0.0555556	0	0.0555556	0	0.0555556	0	0.0555556	1	0.0555556	0	0.0555556	0.111111	0.333	No	0
570	Oilpalm_Control	0	0.166667	0	0.166667	0	0.166667	0	0.166667	0	0.0555556	0	0.0555556	0	0.0555556	0	0.0555556	0	0.0555556	0	0.0555556	0	0.333	No	0
571	Oilpalm_Control	0	0.166667	0	0.166667	0	0.166667	0	0.166667	0	0.0555556	0	0.0555556	0	0.0555556	0	0.0555556	0	0.0555556	0	0.0555556	0	0.333	No	0
572	Oilpalm_Control	0	0.166667	1	0.166667	0	0.166667	0	0.166667	0	0.0555556	0	0.0555556	0	0.0555556	1	0.0555556	1	0.0555556	0	0.0555556	0.277778	0.333	No	0
573	Oilpalm_Control	0	0.166667	1	0.166667	0	0.166667	1	0.166667	0	0.0555556	0	0.0555556	0	0.0555556	1	0.0555556	1	0.0555556	1	0.0555556	0.5	0.333	Yes	0.5
574	Oilpalm_Control	0	0.166667	1	0.166667	0	0.166667	1	0.166667	0	0.0555556	0	0.0555556	0	0.0555556	1	0.0555556	0	0.0555556	0	0.0555556	0.388889	0.333	Yes	0.388889
575	Oilpalm_Control	0	0.166667	1	0.166667	0	0.166667	0	0.166667	0	0.0555556	0	0.0555556	0	0.0555556	0	0.0555556	0	0.0555556	0	0.0555556	0.166667	0.333	No	0
576	Oilpalm_Control	0	0.166667	0	0.166667	0	0.166667	0	0.166667	0	0.0555556	0	0.0555556	0	0.0555556	0	0.0555556	0	0.0555556	1	0.0555556	0.0555556	0.333	No	0
577	Oilpalm_Control	0	0.166667	1	0.166667	0	0.166667	1	0.166667	0	0.0555556	0	0.0555556	0	0.0555556	0	0.0555556	1	0.0555556	0	0.0555556	0.388889	0.333	Yes	0.388889
578	Oilpalm_Control	0	0.166667	1	0.166667	0	0.166667	1	0.166667	0	0.0555556	0	0.0555556	0	0.0555556	0	0.0555556	1	0.0555556	1	0.0555556	0.444444	0.333	Yes	0.444444
579	Oilpalm_Control	0	0.166667	1	0.166667	0	0.166667	1	0.166667	0	0.0555556	0	0.0555556	0	0.0555556	0	0.0555556	0	0.0555556	0	0.0555556	0.333333	0.333	Yes	0.333333
580	Oilpalm_Control	0	0.166667	0	0.166667	0	0.166667	1	0.166667	0	0.0555556	0	0.0555556	0	0.0555556	0	0.0555556	1	0.0555556	0	0.0555556	0.222222	0.333	No	0
581	Oilpalm_Control	0	0.166667	1	0.166667	0	0.166667	1	0.166667	0	0.0555556	0	0.0555556	0	0.0555556	0	0.0555556	0	0.0555556	0	0.0555556	0.333333	0.333	Yes	0.333333
582	Oilpalm_Control	0	0.166667	1	0.166667	0	0.166667	1	0.166667	0	0.0555556	0	0.0555556	0	0.0555556	0	0.0555556	0	0.0555556	0	0.0555556	0.333333	0.333	Yes	0.333333
583	Oilpalm_Control	0	0.166667	0	0.166667	0	0.166667	1	0.166667	0	0.0555556	0	0.0555556	0	0.0555556	0	0.0555556	1	0.0555556	0	0.0555556	0.222222	0.333	No	0
584	Oilpalm_Control	0	0.166667	1	0.166667	0	0.166667	1	0.166667	0	0.0555556	0	0.0555556	0	0.0555556	0	0.0555556	1	0.0555556	0	0.0555556	0.388889	0.333	Yes	0.388889
585	Oilpalm_Control	0	0.166667	0	0.166667	0	0.166667	1	0.166667	0	0.0555556	0	0.0555556	0	0.0555556	1	0.0555556	0	0.0555556	0	0.0555556	0.222222	0.333	No	0
586	Oilpalm_Control	0	0.166667	0	0.166667	0	0.166667	1	0.166667	0	0.0555556	0	0.0555556	0	0.0555556	0	0.0555556	1	0.0555556	0	0.0555556	0.222222	0.333	No	0
587	Oilpalm_Control	0	0.166667	1	0.166667	0	0.166667	1	0.166667	0	0.0555556	0	0.0555556	0	0.0555556	1	0.0555556	1	0.0555556	0	0.0555556	0.444444	0.333	Yes	0.444444
588	Oilpalm_Control	0	0.166667	1	0.166667	0	0.166667	1	0.166667	0	0.0555556	0	0.0555556	0	0.0555556	1	0.0555556	1	0.0555556	0	0.0555556	0.444444	0.333	Yes	0.444444
589	Oilpalm_Control	0	0.166667	0	0.166667	0	0.166667	1	0.166667	0	0.0555556	0	0.0555556	0	0.0555556	0	0.0555556	0	0.0555556	1	0.0555556	0.222222	0.333	No	0
590	Oilpalm_Control	0	0.166667	1	0.166667	0	0.166667	1	0.166667	1	0.0555556	0	0.0555556	1	0.0555556	1	0.0555556	1	0.0555556	1	0.0555556	0.611111	0.333	Yes	0.611111
591	Oilpalm_Control	0	0.166667	1	0.166667	0	0.166667	1	0.166667	0	0.0555556	0	0.0555556	1	0.0555556	1	0.0555556	0	0.0555556	0	0.0555556	0.444444	0.333	Yes	0.444444
592	Oilpalm_Control	0	0.166667	0	0.166667	0	0.166667	1	0.166667	1	0.0555556	0	0.0555556	1	0.0555556	0	0.0555556	0	0.0555556	1	0.0555556	0.333333	0.333	Yes	0.333333
593	Oilpalm_Control	0	0.166667	1	0.166667	0	0.166667	1	0.166667	0	0.0555556	0	0.0555556	1	0.0555556	1	0.0555556	0	0.0555556	0	0.0555556	0.444444	0.333	Yes	0.444444
594	Oilpalm_Control	0	0.166667	0	0.166667	0	0.166667	1	0.166667	1	0.0555556	0	0.0555556	1	0.0555556	0	0.0555556	0	0.0555556	0	0.0555556	0.277778	0.333	No	0
595	Oilpalm_Control	0	0.166667	1	0.166667	0	0.166667	1	0.166667	0	0.0555556	0	0.0555556	1	0.0555556	0	0.0555556	0	0.0555556	0	0.0555556	0.388889	0.333	Yes	0.388889
596	Oilpalm_Control	0	0.166667	1	0.166667	0	0.166667	1	0.166667	1	0.0555556	0	0.0555556	1	0.0555556	0	0.0555556	0	0.0555556	0	0.0555556	0.444444	0.333	Yes	0.444444
597	Oilpalm_Control	0	0.166667	1	0.166667	0	0.166667	1	0.166667	0	0.0555556	0	0.0555556	1	0.0555556	0	0.0555556	1	0.0555556	0	0.0555556	0.444444	0.333	Yes	0.444444
598	Oilpalm_Control	0	0.166667	1	0.166667	0	0.166667	1	0.166667	1	0.0555556	0	0.0555556	1	0.0555556	1	0.0555556	0	0.0555556	0	0.0555556	0.5	0.333	Yes	0.5
599	Oilpalm_Control	0	0.166667	0	0.166667	0	0.166667	1	0.166667	0	0.0555556	0	0.0555556	0	0.0555556	0	0.0555556	0	0.0555556	0	0.0555556	0.166667	0.333	No	0
600	Oilpalm_Control	0	0.166667	1	0.166667	0	0.166667	0	0.166667	0	0.0555556	0	0.0555556	0	0.0555556	1	0.0555556	1	0.0555556	0	0.0555556	0.277778	0.333	No	0
601	Jatropha_PermanentWorker	0	0.166667	0	0.166667	0	0.166667	0	0.166667	0	0.0555556	1	0.0555556	1	0.0555556	0	0.0555556	1	0.0555556	0	0.0555556	0.166667	0.333	No	0
602	Jatropha_PermanentWorker	0	0.166667	1	0.166667	0	0.166667	0	0.166667	1	0.0555556	1	0.0555556	1	0.0555556	0	0.0555556	1	0.0555556	0	0.0555556	0.388889	0.333	Yes	0.388889
603	Jatropha_PermanentWorker	0	0.166667	1	0.166667	0	0.166667	0	0.166667	1	0.0555556	1	0.0555556	1	0.0555556	0	0.0555556	1	0.0555556	0	0.0555556	0.388889	0.333	Yes	0.388889
604	Jatropha_PermanentWorker	0	0.166667	0	0.166667	0	0.166667	0	0.166667	1	0.0555556	1	0.0555556	1	0.0555556	0	0.0555556	1	0.0555556	0	0.0555556	0.222222	0.333	No	0
605	Jatropha_PermanentWorker	0	0.166667	1	0.166667	0	0.166667	0	0.166667	1	0.0555556	1	0.0555556	1	0.0555556	0	0.0555556	1	0.0555556	0	0.0555556	0.388889	0.333	Yes	0.388889
606	Jatropha_PermanentWorker	0	0.166667	0	0.166667	0	0.166667	0	0.166667	1	0.0555556	1	0.0555556	1	0.0555556	0	0.0555556	1	0.0555556	0	0.0555556	0.222222	0.333	No	0
607	Jatropha_PermanentWorker	0	0.166667	1	0.166667	0	0.166667	0	0.166667	1	0.0555556	1	0.0555556	1	0.0555556	0	0.0555556	1	0.0555556	0	0.0555556	0.388889	0.333	Yes	0.388889
608	Jatropha_PermanentWorker	1	0.166667	1	0.166667	0	0.166667	0	0.166667	1	0.0555556	1	0.0555556	1	0.0555556	0	0.0555556	1	0.0555556	0	0.0555556	0.555556	0.333	Yes	0.555556
609	Jatropha_PermanentWorker	0	0.166667	0	0.166667	0	0.166667	0	0.166667	1	0.0555556	1	0.0555556	1	0.0555556	0	0.0555556	1	0.0555556	0	0.0555556	0.222222	0.333	No	0
610	Jatropha_PermanentWorker	0	0.166667	0	0.166667	0	0.166667	0	0.166667	1	0.0555556	1	0.0555556	1	0.0555556	0	0.0555556	1	0.0555556	0	0.0555556	0.222222	0.333	No	0
611	Jatropha_PermanentWorker	0	0.166667	0	0.166667	0	0.166667	0	0.166667	1	0.0555556	1	0.0555556	1	0.0555556	0	0.0555556	1	0.0555556	0	0.0555556	0.222222	0.333	No	0
612	Jatropha_PermanentWorker	0	0.166667	1	0.166667	0	0.166667	0	0.166667	1	0.0555556	1	0.0555556	1	0.0555556	0	0.0555556	1	0.0555556	0	0.0555556	0.388889	0.333	Yes	0.388889
613	Jatropha_PermanentWorker	0	0.166667	0	0.166667	0	0.166667	0	0.166667	1	0.0555556	1	0.0555556	1	0.0555556	0	0.0555556	1	0.0555556	0	0.0555556	0.222222	0.333	No	0
614	Jatropha_PermanentWorker	0	0.166667	0	0.166667	0	0.166667	0	0.166667	1	0.0555556	1	0.0555556	1	0.0555556	0	0.0555556	1	0.0555556	0	0.0555556	0.222222	0.333	No	0
615	Jatropha_PermanentWorker	1	0.166667	1	0.166667	0	0.166667	0	0.166667	1	0.0555556	1	0.0555556	1	0.0555556	1	0.0555556	1	0.0555556	0	0.0555556	0.611111	0.333	Yes	0.611111
616	Jatropha_PermanentWorker	1	0.166667	1	0.166667	1	0.166667	0	0.166667	0	0.0555556	1	0.0555556	1	0.0555556	1	0.0555556	1	0.0555556	0	0.0555556	0.722222	0.333	Yes	0.722222
617	Jatropha_PermanentWorker	1	0.166667	1	0.166667	0	0.166667	0	0.166667	0	0.0555556	1	0.0555556	1	0.0555556	1	0.0555556	1	0.0555556	0	0.0555556	0.555556	0.333	Yes	0.555556
618	Jatropha_PermanentWorker	1	0.166667	1	0.166667	1	0.166667	0	0.166667	0	0.0555556	1	0.0555556	1	0.0555556	0	0.0555556	1	0.0555556	0	0.0555556	0.666667	0.333	Yes	0.666667
619	Jatropha_PermanentWorker	0	0.166667	0	0.166667	0	0.166667	0	0.166667	1	0.0555556	0	0.0555556	1	0.0555556	0	0.0555556	1	0.0555556	0	0.0555556	0.166667	0.333	No	0
620	Jatropha_PermanentWorker	0	0.166667	1	0.166667	0	0.166667	0	0.166667	1	0.0555556	1	0.0555556	1	0.0555556	0	0.0555556	1	0.0555556	0	0.0555556	0.388889	0.333	Yes	0.388889
621	Jatropha_PermanentWorker	0	0.166667	0	0.166667	0	0.166667	0	0.166667	1	0.0555556	1	0.0555556	1	0.0555556	0	0.0555556	1	0.0555556	0	0.0555556	0.222222	0.333	No	0
622	Jatropha_PermanentWorker	0	0.166667	0	0.166667	0	0.166667	0	0.166667	1	0.0555556	1	0.0555556	1	0.0555556	0	0.0555556	1	0.0555556	0	0.0555556	0.222222	0.333	No	0
623	Jatropha_PermanentWorker	1	0.166667	1	0.166667	0	0.166667	0	0.166667	1	0.0555556	1	0.0555556	1	0.0555556	0	0.0555556	1	0.0555556	0	0.0555556	0.555556	0.333	Yes	0.555556
624	Jatropha_PermanentWorker	1	0.166667	1	0.166667	0	0.166667	0	0.166667	0	0.0555556	1	0.0555556	1	0.0555556	0	0.0555556	1	0.0555556	0	0.0555556	0.5	0.333	Yes	0.5
625	Jatropha_PermanentWorker	1	0.166667	0	0.166667	0	0.166667	0	0.166667	1	0.0555556	1	0.0555556	1	0.0555556	0	0.0555556	1	0.0555556	0	0.0555556	0.388889	0.333	Yes	0.388889
626	Jatropha_PermanentWorker	1	0.166667	1	0.166667	0	0.166667	0	0.166667	0	0.0555556	1	0.0555556	1	0.0555556	0	0.0555556	1	0.0555556	0	0.0555556	0.5	0.333	Yes	0.5
627	Jatropha_PermanentWorker	1	0.166667	1	0.166667	0	0.166667	0	0.166667	0	0.0555556	1	0.0555556	1	0.0555556	0	0.0555556	1	0.0555556	0	0.0555556	0.5	0.333	Yes	0.5
628	Jatropha_PermanentWorker	1	0.166667	1	0.166667	0	0.166667	0	0.166667	0	0.0555556	1	0.0555556	1	0.0555556	0	0.0555556	1	0.0555556	0	0.0555556	0.5	0.333	Yes	0.5
629	Jatropha_PermanentWorker	1	0.166667	0	0.166667	0	0.166667	0	0.166667	1	0.0555556	1	0.0555556	1	0.0555556	0	0.0555556	1	0.0555556	0	0.0555556	0.388889	0.333	Yes	0.388889
630	Jatropha_PermanentWorker	1	0.166667	1	0.166667	0	0.166667	0	0.166667	1	0.0555556	1	0.0555556	1	0.0555556	0	0.0555556	1	0.0555556	0	0.0555556	0.555556	0.333	Yes	0.555556
631	Jatropha_PermanentWorker	0	0.166667	0	0.166667	0	0.166667	0	0.166667	0	0.0555556	1	0.0555556	1	0.0555556	0	0.0555556	1	0.0555556	0	0.0555556	0.166667	0.333	No	0
632	Jatropha_PermanentWorker	1	0.166667	1	0.166667	0	0.166667	0	0.166667	0	0.0555556	1	0.0555556	1	0.0555556	0	0.0555556	1	0.0555556	0	0.0555556	0.5	0.333	Yes	0.5
633	Jatropha_PermanentWorker	1	0.166667	0	0.166667	0	0.166667	0	0.166667	1	0.0555556	1	0.0555556	1	0.0555556	0	0.0555556	1	0.0555556	0	0.0555556	0.388889	0.333	Yes	0.388889
634	Jatropha_PermanentWorker	1	0.166667	1	0.166667	0	0.166667	0	0.166667	1	0.0555556	1	0.0555556	1	0.0555556	0	0.0555556	1	0.0555556	0	0.0555556	0.555556	0.333	Yes	0.555556
635	Jatropha_PermanentWorker	0	0.166667	0	0.166667	0	0.166667	0	0.166667	0	0.0555556	1	0.0555556	1	0.0555556	0	0.0555556	1	0.0555556	0	0.0555556	0.166667	0.333	No	0
636	Jatropha_PermanentWorker	0	0.166667	0	0.166667	0	0.166667	0	0.166667	1	0.0555556	1	0.0555556	1	0.0555556	0	0.0555556	1	0.0555556	0	0.0555556	0.222222	0.333	No	0
637	Jatropha_PermanentWorker	0	0.166667	0	0.166667	0	0.166667	0	0.166667	1	0.0555556	1	0.0555556	1	0.0555556	0	0.0555556	1	0.0555556	0	0.0555556	0.222222	0.333	No	0
638	Jatropha_PermanentWorker	1	0.166667	1	0.166667	0	0.166667	0	0.166667	0	0.0555556	1	0.0555556	1	0.0555556	0	0.0555556	1	0.0555556	0	0.0555556	0.5	0.333	Yes	0.5
639	Jatropha_PermanentWorker	1	0.166667	1	0.166667	0	0.166667	0	0.166667	1	0.0555556	1	0.0555556	1	0.0555556	1	0.0555556	1	0.0555556	0	0.0555556	0.611111	0.333	Yes	0.611111
640	Jatropha_PermanentWorker	0	0.166667	0	0.166667	0	0.166667	0	0.166667	1	0.0555556	1	0.0555556	1	0.0555556	0	0.0555556	1	0.0555556	0	0.0555556	0.222222	0.333	No	0
641	Jatropha_PermanentWorker	0	0.166667	0	0.166667	0	0.166667	0	0.166667	0	0.0555556	1	0.0555556	1	0.0555556	0	0.0555556	1	0.0555556	0	0.0555556	0.166667	0.333	No	0
642	Jatropha_PermanentWorker	1	0.166667	1	0.166667	1	0.166667	0	0.166667	0	0.0555556	1	0.0555556	1	0.0555556	0	0.0555556	1	0.0555556	0	0.0555556	0.666667	0.333	Yes	0.666667
643	Jatropha_PermanentWorker	0	0.166667	0	0.166667	0	0.166667	0	0.166667	1	0.0555556	1	0.0555556	1	0.0555556	0	0.0555556	1	0.0555556	0	0.0555556	0.222222	0.333	No	0
644	Jatropha_PermanentWorker	0	0.166667	0	0.166667	0	0.166667	0	0.166667	1	0.0555556	1	0.0555556	1	0.0555556	0	0.0555556	1	0.0555556	0	0.0555556	0.222222	0.333	No	0
645	Jatropha_PermanentWorker	1	0.166667	1	0.166667	0	0.166667	0	0.166667	1	0.0555556	0	0.0555556	1	0.0555556	0	0.0555556	1	0.0555556	0	0.0555556	0.5	0.333	Yes	0.5
646	Jatropha_PermanentWorker	1	0.166667	1	0.166667	0	0.166667	0	0.166667	0	0.0555556	1	0.0555556	1	0.0555556	0	0.0555556	1	0.0555556	0	0.0555556	0.5	0.333	Yes	0.5
647	Jatropha_PermanentWorker	1	0.166667	1	0.166667	0	0.166667	0	0.166667	0	0.0555556	1	0.0555556	1	0.0555556	0	0.0555556	1	0.0555556	0	0.0555556	0.5	0.333	Yes	0.5
648	Jatropha_PermanentWorker	1	0.166667	1	0.166667	0	0.166667	0	0.166667	0	0.0555556	1	0.0555556	1	0.0555556	0	0.0555556	1	0.0555556	0	0.0555556	0.5	0.333	Yes	0.5
649	Jatropha_PermanentWorker	1	0.166667	1	0.166667	0	0.166667	0	0.166667	0	0.0555556	1	0.0555556	1	0.0555556	0	0.0555556	1	0.0555556	0	0.0555556	0.5	0.333	Yes	0.5
650	Jatropha_PermanentWorker	0	0.166667	0	0.166667	0	0.166667	0	0.166667	1	0.0555556	1	0.0555556	1	0.0555556	0	0.0555556	1	0.0555556	0	0.0555556	0.222222	0.333	No	0
651	Jatropha_PermanentWorker	0	0.166667	0	0.166667	0	0.166667	0	0.166667	1	0.0555556	1	0.0555556	1	0.0555556	0	0.0555556	1	0.0555556	0	0.0555556	0.222222	0.333	No	0
652	Jatropha_PermanentWorker	1	0.166667	1	0.166667	0	0.166667	0	0.166667	1	0.0555556	1	0.0555556	1	0.0555556	0	0.0555556	1	0.0555556	0	0.0555556	0.555556	0.333	Yes	0.555556
653	Jatropha_PermanentWorker	1	0.166667	1	0.166667	0	0.166667	0	0.166667	0	0.0555556	1	0.0555556	1	0.0555556	0	0.0555556	1	0.0555556	0	0.0555556	0.5	0.333	Yes	0.5
654	Jatropha_PermanentWorker	0	0.166667	0	0.166667	0	0.166667	0	0.166667	0	0.0555556	1	0.0555556	1	0.0555556	0	0.0555556	1	0.0555556	0	0.0555556	0.166667	0.333	No	0
655	Jatropha_PermanentWorker	0	0.166667	0	0.166667	0	0.166667	0	0.166667	1	0.0555556	1	0.0555556	1	0.0555556	0	0.0555556	1	0.0555556	0	0.0555556	0.222222	0.333	No	0
656	Jatropha_PermanentWorker	1	0.166667	1	0.166667	0	0.166667	0	0.166667	1	0.0555556	1	0.0555556	1	0.0555556	0	0.0555556	1	0.0555556	0	0.0555556	0.555556	0.333	Yes	0.555556
657	Jatropha_PermanentWorker	1	0.166667	1	0.166667	0	0.166667	0	0.166667	1	0.0555556	1	0.0555556	1	0.0555556	0	0.0555556	1	0.0555556	0	0.0555556	0.555556	0.333	Yes	0.555556
658	Jatropha_PermanentWorker	0	0.166667	0	0.166667	0	0.166667	0	0.166667	1	0.0555556	1	0.0555556	1	0.0555556	0	0.0555556	1	0.0555556	0	0.0555556	0.222222	0.333	No	0
659	Jatropha_PermanentWorker	0	0.166667	0	0.166667	0	0.166667	0	0.166667	1	0.0555556	1	0.0555556	1	0.0555556	0	0.0555556	1	0.0555556	0	0.0555556	0.222222	0.333	No	0
660	Jatropha_PermanentWorker	0	0.166667	0	0.166667	0	0.166667	0	0.166667	1	0.0555556	1	0.0555556	1	0.0555556	0	0.0555556	1	0.0555556	0	0.0555556	0.222222	0.333	No	0
661	Jatropha_PermanentWorker	0	0.166667	0	0.166667	0	0.166667	0	0.166667	1	0.0555556	1	0.0555556	1	0.0555556	0	0.0555556	1	0.0555556	0	0.0555556	0.222222	0.333	No	0
662	Jatropha_PermanentWorker	1	0.166667	1	0.166667	0	0.166667	0	0.166667	1	0.0555556	1	0.0555556	1	0.0555556	0	0.0555556	1	0.0555556	0	0.0555556	0.555556	0.333	Yes	0.555556
663	Jatropha_PermanentWorker	0	0.166667	0	0.166667	0	0.166667	0	0.166667	1	0.0555556	1	0.0555556	1	0.0555556	0	0.0555556	1	0.0555556	0	0.0555556	0.222222	0.333	No	0
664	Jatropha_PermanentWorker	1	0.166667	1	0.166667	0	0.166667	0	0.166667	1	0.0555556	1	0.0555556	1	0.0555556	0	0.0555556	1	0.0555556	0	0.0555556	0.555556	0.333	Yes	0.555556
665	Jatropha_PermanentWorker	0	0.166667	0	0.166667	0	0.166667	0	0.166667	1	0.0555556	1	0.0555556	1	0.0555556	0	0.0555556	1	0.0555556	0	0.0555556	0.222222	0.333	No	0
666	Jatropha_PermanentWorker	0	0.166667	0	0.166667	0	0.166667	0	0.166667	0	0.0555556	1	0.0555556	1	0.0555556	1	0.0555556	1	0.0555556	0	0.0555556	0.222222	0.333	No	0
667	Jatropha_PermanentWorker	0	0.166667	0	0.166667	0	0.166667	0	0.166667	1	0.0555556	0	0.0555556	1	0.0555556	0	0.0555556	1	0.0555556	0	0.0555556	0.166667	0.333	No	0
668	Jatropha_PermanentWorker	0	0.166667	0	0.166667	0	0.166667	0	0.166667	0	0.0555556	1	0.0555556	1	0.0555556	1	0.0555556	1	0.0555556	0	0.0555556	0.222222	0.333	No	0
669	Jatropha_PermanentWorker	1	0.166667	1	0.166667	0	0.166667	0	0.166667	1	0.0555556	1	0.0555556	1	0.0555556	1	0.0555556	1	0.0555556	0	0.0555556	0.611111	0.333	Yes	0.611111
670	Jatropha_PermanentWorker	0	0.166667	0	0.166667	0	0.166667	0	0.166667	0	0.0555556	1	0.0555556	1	0.0555556	0	0.0555556	1	0.0555556	0	0.0555556	0.166667	0.333	No	0
671	Jatropha_PermanentWorker	1	0.166667	1	0.166667	0	0.166667	0	0.166667	0	0.0555556	1	0.0555556	1	0.0555556	0	0.0555556	1	0.0555556	0	0.0555556	0.5	0.333	Yes	0.5
672	Jatropha_PermanentWorker	0	0.166667	0	0.166667	0	0.166667	0	0.166667	1	0.0555556	1	0.0555556	1	0.0555556	0	0.0555556	1	0.0555556	0	0.0555556	0.222222	0.333	No	0
673	Jatropha_PermanentWorker	0	0.166667	0	0.166667	0	0.166667	0	0.166667	1	0.0555556	1	0.0555556	1	0.0555556	0	0.0555556	1	0.0555556	0	0.0555556	0.222222	0.333	No	0
674	Jatropha_PermanentWorker	1	0.166667	1	0.166667	0	0.166667	0	0.166667	0	0.0555556	1	0.0555556	1	0.0555556	0	0.0555556	1	0.0555556	0	0.0555556	0.5	0.333	Yes	0.5
675	Jatropha_PermanentWorker	0	0.166667	0	0.166667	0	0.166667	0	0.166667	0	0.0555556	1	0.0555556	1	0.0555556	0	0.0555556	1	0.0555556	0	0.0555556	0.166667	0.333	No	0
676	Jatropha_PermanentWorker	1	0.166667	1	0.166667	0	0.166667	0	0.166667	0	0.0555556	1	0.0555556	1	0.0555556	0	0.0555556	1	0.0555556	0	0.0555556	0.5	0.333	Yes	0.5
677	Jatropha_PermanentWorker	0	0.166667	0	0.166667	0	0.166667	0	0.166667	0	0.0555556	1	0.0555556	1	0.0555556	0	0.0555556	1	0.0555556	0	0.0555556	0.166667	0.333	No	0
678	Jatropha_PermanentWorker	0	0.166667	0	0.166667	0	0.166667	0	0.166667	0	0.0555556	1	0.0555556	1	0.0555556	0	0.0555556	1	0.0555556	0	0.0555556	0.166667	0.333	No	0
679	Jatropha_PermanentWorker	1	0.166667	1	0.166667	0	0.166667	0	0.166667	0	0.0555556	1	0.0555556	1	0.0555556	0	0.0555556	1	0.0555556	0	0.0555556	0.5	0.333	Yes	0.5
680	Jatropha_PermanentWorker	1	0.166667	1	0.166667	0	0.166667	0	0.166667	0	0.0555556	1	0.0555556	1	0.0555556	0	0.0555556	1	0.0555556	0	0.0555556	0.5	0.333	Yes	0.5
681	Jatropha_PermanentWorker	1	0.166667	1	0.166667	0	0.166667	0	0.166667	0	0.0555556	1	0.0555556	1	0.0555556	0	0.0555556	1	0.0555556	0	0.0555556	0.5	0.333	Yes	0.5
682	Jatropha_PermanentWorker	1	0.166667	1	0.166667	0	0.166667	0	0.166667	0	0.0555556	1	0.0555556	1	0.0555556	0	0.0555556	1	0.0555556	0	0.0555556	0.5	0.333	Yes	0.5
683	Jatropha_PermanentWorker	1	0.166667	1	0.166667	0	0.166667	0	0.166667	0	0.0555556	1	0.0555556	1	0.0555556	1	0.0555556	1	0.0555556	0	0.0555556	0.555556	0.333	Yes	0.555556
684	Jatropha_PermanentWorker	1	0.166667	1	0.166667	0	0.166667	0	0.166667	0	0.0555556	1	0.0555556	1	0.0555556	1	0.0555556	1	0.0555556	0	0.0555556	0.555556	0.333	Yes	0.555556
685	Jatropha_PermanentWorker	0	0.166667	0	0.166667	0	0.166667	0	0.166667	0	0.0555556	1	0.0555556	1	0.0555556	1	0.0555556	1	0.0555556	0	0.0555556	0.222222	0.333	No	0
686	Jatropha_PermanentWorker	1	0.166667	1	0.166667	0	0.166667	0	0.166667	0	0.0555556	1	0.0555556	1	0.0555556	1	0.0555556	1	0.0555556	0	0.0555556	0.555556	0.333	Yes	0.555556
687	Jatropha_PermanentWorker	1	0.166667	1	0.166667	0	0.166667	0	0.166667	0	0.0555556	1	0.0555556	1	0.0555556	1	0.0555556	1	0.0555556	0	0.0555556	0.555556	0.333	Yes	0.555556
688	Jatropha_PermanentWorker	1	0.166667	1	0.166667	0	0.166667	0	0.166667	0	0.0555556	1	0.0555556	1	0.0555556	1	0.0555556	1	0.0555556	0	0.0555556	0.555556	0.333	Yes	0.555556
689	Jatropha_PermanentWorker	0	0.166667	0	0.166667	0	0.166667	0	0.166667	0	0.0555556	1	0.0555556	1	0.0555556	0	0.0555556	1	0.0555556	0	0.0555556	0.166667	0.333	No	0
690	Jatropha_PermanentWorker	1	0.166667	1	0.166667	0	0.166667	0	0.166667	0	0.0555556	1	0.0555556	1	0.0555556	0	0.0555556	1	0.0555556	0	0.0555556	0.5	0.333	Yes	0.5
691	Jatropha_PermanentWorker	0	0.166667	0	0.166667	0	0.166667	0	0.166667	0	0.0555556	1	0.0555556	1	0.0555556	0	0.0555556	1	0.0555556	0	0.0555556	0.166667	0.333	No	0
692	Jatropha_PermanentWorker	1	0.166667	1	0.166667	0	0.166667	0	0.166667	0	0.0555556	1	0.0555556	1	0.0555556	0	0.0555556	1	0.0555556	0	0.0555556	0.5	0.333	Yes	0.5
693	Jatropha_PermanentWorker	1	0.166667	1	0.166667	0	0.166667	0	0.166667	0	0.0555556	1	0.0555556	1	0.0555556	0	0.0555556	1	0.0555556	0	0.0555556	0.5	0.333	Yes	0.5
694	Jatropha_PermanentWorker	1	0.166667	1	0.166667	0	0.166667	0	0.166667	0	0.0555556	1	0.0555556	1	0.0555556	0	0.0555556	1	0.0555556	0	0.0555556	0.5	0.333	Yes	0.5
695	Jatropha_PermanentWorker	1	0.166667	1	0.166667	0	0.166667	1	0.166667	0	0.0555556	1	0.0555556	1	0.0555556	0	0.0555556	1	0.0555556	0	0.0555556	0.666667	0.333	Yes	0.666667
696	Jatropha_PermanentWorker	1	0.166667	1	0.166667	0	0.166667	1	0.166667	0	0.0555556	1	0.0555556	1	0.0555556	0	0.0555556	1	0.0555556	0	0.0555556	0.666667	0.333	Yes	0.666667
697	Jatropha_PermanentWorker	1	0.166667	1	0.166667	0	0.166667	1	0.166667	0	0.0555556	1	0.0555556	1	0.0555556	0	0.0555556	1	0.0555556	0	0.0555556	0.666667	0.333	Yes	0.666667
698	Jatropha_PermanentWorker	1	0.166667	1	0.166667	0	0.166667	1	0.166667	0	0.0555556	1	0.0555556	1	0.0555556	0	0.0555556	1	0.0555556	0	0.0555556	0.666667	0.333	Yes	0.666667
699	Jatropha_PermanentWorker	1	0.166667	1	0.166667	0	0.166667	1	0.166667	0	0.0555556	1	0.0555556	1	0.0555556	0	0.0555556	1	0.0555556	0	0.0555556	0.666667	0.333	Yes	0.666667
700	Jatropha_PermanentWorker	1	0.166667	1	0.166667	0	0.166667	0	0.166667	0	0.0555556	1	0.0555556	1	0.0555556	0	0.0555556	1	0.0555556	0	0.0555556	0.5	0.333	Yes	0.5
701	Jatropha_SeasonalWorker	0	0.166667	0	0.166667	0	0.166667	0	0.166667	1	0.0555556	1	0.0555556	1	0.0555556	0	0.0555556	1	0.0555556	0	0.0555556	0.222222	0.333	No	0
702	Jatropha_SeasonalWorker	0	0.166667	0	0.166667	1	0.166667	0	0.166667	1	0.0555556	1	0.0555556	1	0.0555556	0	0.0555556	1	0.0555556	0	0.0555556	0.388889	0.333	Yes	0.388889
703	Jatropha_SeasonalWorker	0	0.166667	0	0.166667	1	0.166667	0	0.166667	1	0.0555556	1	0.0555556	1	0.0555556	0	0.0555556	1	0.0555556	0	0.0555556	0.388889	0.333	Yes	0.388889
704	Jatropha_SeasonalWorker	0	0.166667	0	0.166667	0	0.166667	0	0.166667	1	0.0555556	1	0.0555556	1	0.0555556	0	0.0555556	1	0.0555556	0	0.0555556	0.222222	0.333	No	0
705	Jatropha_SeasonalWorker	0	0.166667	0	0.166667	1	0.166667	0	0.166667	0	0.0555556	1	0.0555556	1	0.0555556	1	0.0555556	1	0.0555556	0	0.0555556	0.388889	0.333	Yes	0.388889
706	Jatropha_SeasonalWorker	0	0.166667	0	0.166667	0	0.166667	0	0.166667	1	0.0555556	1	0.0555556	1	0.0555556	0	0.0555556	1	0.0555556	0	0.0555556	0.222222	0.333	No	0
707	Jatropha_SeasonalWorker	0	0.166667	0	0.166667	0	0.166667	1	0.166667	0	0.0555556	1	0.0555556	1	0.0555556	0	0.0555556	1	0.0555556	0	0.0555556	0.333333	0.333	Yes	0.333333
708	Jatropha_SeasonalWorker	0	0.166667	0	0.166667	0	0.166667	0	0.166667	1	0.0555556	1	0.0555556	1	0.0555556	0	0.0555556	1	0.0555556	0	0.0555556	0.222222	0.333	No	0
709	Jatropha_SeasonalWorker	1	0.166667	1	0.166667	0	0.166667	0	0.166667	1	0.0555556	1	0.0555556	1	0.0555556	0	0.0555556	1	0.0555556	0	0.0555556	0.555556	0.333	Yes	0.555556
710	Jatropha_SeasonalWorker	1	0.166667	1	0.166667	1	0.166667	1	0.166667	1	0.0555556	1	0.0555556	1	0.0555556	0	0.0555556	1	0.0555556	0	0.0555556	0.888889	0.333	Yes	0.888889
711	Jatropha_SeasonalWorker	1	0.166667	1	0.166667	0	0.166667	0	0.166667	1	0.0555556	1	0.0555556	1	0.0555556	0	0.0555556	1	0.0555556	0	0.0555556	0.555556	0.333	Yes	0.555556
712	Jatropha_SeasonalWorker	0	0.166667	0	0.166667	0	0.166667	0	0.166667	1	0.0555556	1	0.0555556	1	0.0555556	0	0.0555556	1	0.0555556	0	0.0555556	0.222222	0.333	No	0
713	Jatropha_SeasonalWorker	1	0.166667	1	0.166667	0	0.166667	0	0.166667	1	0.0555556	1	0.0555556	1	0.0555556	0	0.0555556	1	0.0555556	0	0.0555556	0.555556	0.333	Yes	0.555556
714	Jatropha_SeasonalWorker	1	0.166667	1	0.166667	0	0.166667	0	0.166667	1	0.0555556	0	0.0555556	1	0.0555556	0	0.0555556	1	0.0555556	0	0.0555556	0.5	0.333	Yes	0.5
715	Jatropha_SeasonalWorker	0	0.166667	0	0.166667	0	0.166667	0	0.166667	1	0.0555556	0	0.0555556	1	0.0555556	0	0.0555556	1	0.0555556	0	0.0555556	0.166667	0.333	No	0
716	Jatropha_SeasonalWorker	1	0.166667	1	0.166667	0	0.166667	0	0.166667	1	0.0555556	1	0.0555556	1	0.0555556	0	0.0555556	1	0.0555556	0	0.0555556	0.555556	0.333	Yes	0.555556
717	Jatropha_SeasonalWorker	0	0.166667	0	0.166667	0	0.166667	0	0.166667	0	0.0555556	1	0.0555556	1	0.0555556	0	0.0555556	1	0.0555556	0	0.0555556	0.166667	0.333	No	0
718	Jatropha_SeasonalWorker	0	0.166667	0	0.166667	0	0.166667	0	0.166667	1	0.0555556	1	0.0555556	1	0.0555556	0	0.0555556	1	0.0555556	0	0.0555556	0.222222	0.333	No	0
719	Jatropha_SeasonalWorker	1	0.166667	1	0.166667	0	0.166667	1	0.166667	1	0.0555556	1	0.0555556	1	0.0555556	1	0.0555556	1	0.0555556	0	0.0555556	0.777778	0.333	Yes	0.777778
720	Jatropha_SeasonalWorker	0	0.166667	0	0.166667	0	0.166667	0	0.166667	1	0.0555556	1	0.0555556	1	0.0555556	0	0.0555556	1	0.0555556	0	0.0555556	0.222222	0.333	No	0
721	Jatropha_SeasonalWorker	0	0.166667	0	0.166667	0	0.166667	0	0.166667	1	0.0555556	1	0.0555556	1	0.0555556	0	0.0555556	1	0.0555556	0	0.0555556	0.222222	0.333	No	0
722	Jatropha_SeasonalWorker	0	0.166667	0	0.166667	0	0.166667	0	0.166667	1	0.0555556	0	0.0555556	1	0.0555556	0	0.0555556	1	0.0555556	0	0.0555556	0.166667	0.333	No	0
723	Jatropha_SeasonalWorker	0	0.166667	0	0.166667	0	0.166667	0	0.166667	0	0.0555556	1	0.0555556	1	0.0555556	0	0.0555556	1	0.0555556	0	0.0555556	0.166667	0.333	No	0
724	Jatropha_SeasonalWorker	0	0.166667	0	0.166667	0	0.166667	0	0.166667	1	0.0555556	1	0.0555556	1	0.0555556	0	0.0555556	1	0.0555556	0	0.0555556	0.222222	0.333	No	0
725	Jatropha_SeasonalWorker	0	0.166667	0	0.166667	0	0.166667	0	0.166667	0	0.0555556	1	0.0555556	1	0.0555556	1	0.0555556	1	0.0555556	0	0.0555556	0.222222	0.333	No	0
726	Jatropha_SeasonalWorker	0	0.166667	0	0.166667	0	0.166667	0	0.166667	1	0.0555556	1	0.0555556	1	0.0555556	1	0.0555556	1	0.0555556	0	0.0555556	0.277778	0.333	No	0
727	Jatropha_SeasonalWorker	1	0.166667	1	0.166667	0	0.166667	1	0.166667	0	0.0555556	1	0.0555556	1	0.0555556	1	0.0555556	1	0.0555556	0	0.0555556	0.722222	0.333	Yes	0.722222
728	Jatropha_SeasonalWorker	0	0.166667	0	0.166667	0	0.166667	0	0.166667	1	0.0555556	1	0.0555556	1	0.0555556	0	0.0555556	1	0.0555556	0	0.0555556	0.222222	0.333	No	0
729	Jatropha_SeasonalWorker	0	0.166667	0	0.166667	0	0.166667	0	0.166667	0	0.0555556	1	0.0555556	1	0.0555556	0	0.0555556	1	0.0555556	0	0.0555556	0.166667	0.333	No	0
730	Jatropha_SeasonalWorker	0	0.166667	0	0.166667	0	0.166667	0	0.166667	1	0.0555556	1	0.0555556	1	0.0555556	0	0.0555556	1	0.0555556	0	0.0555556	0.222222	0.333	No	0
731	Jatropha_SeasonalWorker	0	0.166667	0	0.166667	0	0.166667	0	0.166667	1	0.0555556	1	0.0555556	1	0.0555556	0	0.0555556	1	0.0555556	0	0.0555556	0.222222	0.333	No	0
732	Jatropha_SeasonalWorker	1	0.166667	1	0.166667	0	0.166667	0	0.166667	1	0.0555556	1	0.0555556	1	0.0555556	0	0.0555556	1	0.0555556	0	0.0555556	0.555556	0.333	Yes	0.555556
733	Jatropha_SeasonalWorker	1	0.166667	1	0.166667	0	0.166667	1	0.166667	1	0.0555556	1	0.0555556	1	0.0555556	0	0.0555556	1	0.0555556	0	0.0555556	0.722222	0.333	Yes	0.722222
734	Jatropha_SeasonalWorker	1	0.166667	1	0.166667	0	0.166667	1	0.166667	1	0.0555556	1	0.0555556	1	0.0555556	0	0.0555556	1	0.0555556	0	0.0555556	0.722222	0.333	Yes	0.722222
735	Jatropha_SeasonalWorker	1	0.166667	1	0.166667	0	0.166667	1	0.166667	1	0.0555556	1	0.0555556	1	0.0555556	0	0.0555556	1	0.0555556	0	0.0555556	0.722222	0.333	Yes	0.722222
736	Jatropha_SeasonalWorker	1	0.166667	1	0.166667	0	0.166667	1	0.166667	1	0.0555556	1	0.0555556	1	0.0555556	0	0.0555556	1	0.0555556	0	0.0555556	0.722222	0.333	Yes	0.722222
737	Jatropha_SeasonalWorker	1	0.166667	1	0.166667	0	0.166667	1	0.166667	1	0.0555556	1	0.0555556	1	0.0555556	0	0.0555556	1	0.0555556	0	0.0555556	0.722222	0.333	Yes	0.722222
738	Jatropha_SeasonalWorker	1	0.166667	1	0.166667	0	0.166667	1	0.166667	1	0.0555556	1	0.0555556	1	0.0555556	0	0.0555556	1	0.0555556	0	0.0555556	0.722222	0.333	Yes	0.722222
739	Jatropha_SeasonalWorker	1	0.166667	1	0.166667	0	0.166667	1	0.166667	1	0.0555556	1	0.0555556	1	0.0555556	0	0.0555556	1	0.0555556	0	0.0555556	0.722222	0.333	Yes	0.722222
740	Jatropha_SeasonalWorker	1	0.166667	1	0.166667	0	0.166667	1	0.166667	1	0.0555556	1	0.0555556	1	0.0555556	0	0.0555556	1	0.0555556	0	0.0555556	0.722222	0.333	Yes	0.722222
741	Jatropha_SeasonalWorker	1	0.166667	1	0.166667	0	0.166667	1	0.166667	1	0.0555556	1	0.0555556	1	0.0555556	0	0.0555556	1	0.0555556	0	0.0555556	0.722222	0.333	Yes	0.722222
742	Jatropha_SeasonalWorker	1	0.166667	1	0.166667	0	0.166667	1	0.166667	1	0.0555556	1	0.0555556	1	0.0555556	0	0.0555556	1	0.0555556	0	0.0555556	0.722222	0.333	Yes	0.722222
743	Jatropha_SeasonalWorker	1	0.166667	1	0.166667	0	0.166667	1	0.166667	1	0.0555556	1	0.0555556	1	0.0555556	0	0.0555556	1	0.0555556	0	0.0555556	0.722222	0.333	Yes	0.722222
744	Jatropha_SeasonalWorker	1	0.166667	1	0.166667	0	0.166667	1	0.166667	1	0.0555556	1	0.0555556	1	0.0555556	0	0.0555556	1	0.0555556	0	0.0555556	0.722222	0.333	Yes	0.722222
745	Jatropha_SeasonalWorker	1	0.166667	1	0.166667	0	0.166667	1	0.166667	1	0.0555556	1	0.0555556	1	0.0555556	0	0.0555556	1	0.0555556	0	0.0555556	0.722222	0.333	Yes	0.722222
746	Jatropha_SeasonalWorker	1	0.166667	1	0.166667	0	0.166667	1	0.166667	1	0.0555556	1	0.0555556	1	0.0555556	0	0.0555556	1	0.0555556	0	0.0555556	0.722222	0.333	Yes	0.722222
747	Jatropha_SeasonalWorker	1	0.166667	1	0.166667	0	0.166667	1	0.166667	1	0.0555556	1	0.0555556	1	0.0555556	0	0.0555556	1	0.0555556	0	0.0555556	0.722222	0.333	Yes	0.722222
748	Jatropha_SeasonalWorker	1	0.166667	1	0.166667	0	0.166667	1	0.166667	1	0.0555556	1	0.0555556	1	0.0555556	0	0.0555556	1	0.0555556	0	0.0555556	0.722222	0.333	Yes	0.722222
749	Jatropha_SeasonalWorker	1	0.166667	1	0.166667	0	0.166667	1	0.166667	1	0.0555556	1	0.0555556	1	0.0555556	0	0.0555556	1	0.0555556	0	0.0555556	0.722222	0.333	Yes	0.722222
750	Jatropha_SeasonalWorker	1	0.166667	1	0.166667	0	0.166667	0	0.166667	1	0.0555556	1	0.0555556	1	0.0555556	0	0.0555556	1	0.0555556	0	0.0555556	0.555556	0.333	Yes	0.555556
751	Jatropha_Control	0	0.166667	0	0.166667	0	0.166667	0	0.166667	0	0.0555556	1	0.0555556	1	0.0555556	0	0.0555556	1	0.0555556	0	0.0555556	0.166667	0.333	No	0
752	Jatropha_Control	1	0.166667	1	0.166667	0	0.166667	0	0.166667	1	0.0555556	1	0.0555556	1	0.0555556	0	0.0555556	1	0.0555556	0	0.0555556	0.555556	0.333	Yes	0.555556
753	Jatropha_Control	1	0.166667	1	0.166667	0	0.166667	0	0.166667	0	0.0555556	1	0.0555556	1	0.0555556	0	0.0555556	1	0.0555556	0	0.0555556	0.5	0.333	Yes	0.5
754	Jatropha_Control	1	0.166667	1	0.166667	0	0.166667	0	0.166667	1	0.0555556	1	0.0555556	1	0.0555556	0	0.0555556	1	0.0555556	0	0.0555556	0.555556	0.333	Yes	0.555556
755	Jatropha_Control	0	0.166667	0	0.166667	0	0.166667	0	0.166667	1	0.0555556	0	0.0555556	1	0.0555556	0	0.0555556	1	0.0555556	0	0.0555556	0.166667	0.333	No	0
756	Jatropha_Control	1	0.166667	1	0.166667	0	0.166667	0	0.166667	1	0.0555556	1	0.0555556	1	0.0555556	0	0.0555556	1	0.0555556	0	0.0555556	0.555556	0.333	Yes	0.555556
757	Jatropha_Control	1	0.166667	1	0.166667	0	0.166667	0	0.166667	1	0.0555556	1	0.0555556	1	0.0555556	0	0.0555556	1	0.0555556	0	0.0555556	0.555556	0.333	Yes	0.555556
758	Jatropha_Control	0	0.166667	0	0.166667	0	0.166667	0	0.166667	1	0.0555556	1	0.0555556	1	0.0555556	0	0.0555556	1	0.0555556	0	0.0555556	0.222222	0.333	No	0
759	Jatropha_Control	1	0.166667	1	0.166667	0	0.166667	1	0.166667	0	0.0555556	1	0.0555556	1	0.0555556	0	0.0555556	1	0.0555556	0	0.0555556	0.666667	0.333	Yes	0.666667
760	Jatropha_Control	0	0.166667	0	0.166667	0	0.166667	0	0.166667	1	0.0555556	1	0.0555556	1	0.0555556	0	0.0555556	1	0.0555556	0	0.0555556	0.222222	0.333	No	0
761	Jatropha_Control	1	0.166667	1	0.166667	0	0.166667	0	0.166667	1	0.0555556	1	0.0555556	1	0.0555556	0	0.0555556	1	0.0555556	0	0.0555556	0.555556	0.333	Yes	0.555556
762	Jatropha_Control	0	0.166667	0	0.166667	0	0.166667	0	0.166667	1	0.0555556	1	0.0555556	1	0.0555556	0	0.0555556	1	0.0555556	0	0.0555556	0.222222	0.333	No	0
763	Jatropha_Control	0	0.166667	0	0.166667	0	0.166667	0	0.166667	1	0.0555556	1	0.0555556	1	0.0555556	0	0.0555556	1	0.0555556	0	0.0555556	0.222222	0.333	No	0
764	Jatropha_Control	1	0.166667	1	0.166667	0	0.166667	0	0.166667	0	0.0555556	1	0.0555556	1	0.0555556	0	0.0555556	1	0.0555556	0	0.0555556	0.5	0.333	Yes	0.5
765	Jatropha_Control	1	0.166667	1	0.166667	0	0.166667	0	0.166667	1	0.0555556	1	0.0555556	1	0.0555556	0	0.0555556	1	0.0555556	0	0.0555556	0.555556	0.333	Yes	0.555556
766	Jatropha_Control	1	0.166667	1	0.166667	0	0.166667	0	0.166667	1	0.0555556	1	0.0555556	1	0.0555556	0	0.0555556	1	0.0555556	0	0.0555556	0.555556	0.333	Yes	0.555556
767	Jatropha_Control	0	0.166667	0	0.166667	1	0.166667	0	0.166667	0	0.0555556	1	0.0555556	1	0.0555556	0	0.0555556	1	0.0555556	0	0.0555556	0.333333	0.333	Yes	0.333333
768	Jatropha_Control	0	0.166667	0	0.166667	0	0.166667	0	0.166667	1	0.0555556	1	0.0555556	1	0.0555556	0	0.0555556	1	0.0555556	0	0.0555556	0.222222	0.333	No	0
769	Jatropha_Control	1	0.166667	1	0.166667	0	0.166667	0	0.166667	1	0.0555556	1	0.0555556	1	0.0555556	1	0.0555556	1	0.0555556	0	0.0555556	0.611111	0.333	Yes	0.611111
770	Jatropha_Control	0	0.166667	0	0.166667	0	0.166667	0	0.166667	1	0.0555556	1	0.0555556	1	0.0555556	1	0.0555556	1	0.0555556	0	0.0555556	0.277778	0.333	No	0
771	Jatropha_Control	0	0.166667	0	0.166667	0	0.166667	0	0.166667	1	0.0555556	1	0.0555556	1	0.0555556	1	0.0555556	1	0.0555556	0	0.0555556	0.277778	0.333	No	0
772	Jatropha_Control	0	0.166667	0	0.166667	0	0.166667	0	0.166667	1	0.0555556	1	0.0555556	1	0.0555556	1	0.0555556	1	0.0555556	0	0.0555556	0.277778	0.333	No	0
773	Jatropha_Control	0	0.166667	0	0.166667	0	0.166667	0	0.166667	1	0.0555556	1	0.0555556	1	0.0555556	0	0.0555556	1	0.0555556	0	0.0555556	0.222222	0.333	No	0
774	Jatropha_Control	1	0.166667	1	0.166667	1	0.166667	0	0.166667	0	0.0555556	1	0.0555556	1	0.0555556	0	0.0555556	1	0.0555556	0	0.0555556	0.666667	0.333	Yes	0.666667
775	Jatropha_Control	0	0.166667	0	0.166667	0	0.166667	0	0.166667	0	0.0555556	1	0.0555556	1	0.0555556	0	0.0555556	1	0.0555556	0	0.0555556	0.166667	0.333	No	0
776	Jatropha_Control	0	0.166667	0	0.166667	1	0.166667	0	0.166667	0	0.0555556	1	0.0555556	1	0.0555556	0	0.0555556	1	0.0555556	0	0.0555556	0.333333	0.333	Yes	0.333333
777	Jatropha_Control	0	0.166667	0	0.166667	1	0.166667	0	0.166667	0	0.0555556	1	0.0555556	1	0.0555556	0	0.0555556	1	0.0555556	0	0.0555556	0.333333	0.333	Yes	0.333333
778	Jatropha_Control	0	0.166667	0	0.166667	1	0.166667	0	0.166667	1	0.0555556	1	0.0555556	1	0.0555556	0	0.0555556	1	0.0555556	0	0.0555556	0.388889	0.333	Yes	0.388889
779	Jatropha_Control	0	0.166667	0	0.166667	0	0.166667	0	0.166667	1	0.0555556	1	0.0555556	1	0.0555556	0	0.0555556	1	0.0555556	0	0.0555556	0.222222	0.333	No	0
780	Jatropha_Control	1	0.166667	1	0.166667	0	0.166667	0	0.166667	0	0.0555556	1	0.0555556	1	0.0555556	0	0.0555556	1	0.0555556	0	0.0555556	0.5	0.333	Yes	0.5
781	Jatropha_Control	1	0.166667	1	0.166667	0	0.166667	0	0.166667	1	0.0555556	1	0.0555556	1	0.0555556	0	0.0555556	1	0.0555556	0	0.0555556	0.555556	0.333	Yes	0.555556
782	Jatropha_Control	0	0.166667	0	0.166667	0	0.166667	0	0.166667	0	0.0555556	1	0.0555556	1	0.0555556	0	0.0555556	1	0.0555556	0	0.0555556	0.166667	0.333	No	0
783	Jatropha_Control	0	0.166667	0	0.166667	0	0.166667	1	0.166667	0	0.0555556	1	0.0555556	1	0.0555556	0	0.0555556	1	0.0555556	0	0.0555556	0.333333	0.333	Yes	0.333333
784	Jatropha_Control	0	0.166667	0	0.166667	0	0.166667	0	0.166667	1	0.0555556	1	0.0555556	1	0.0555556	0	0.0555556	1	0.0555556	0	0.0555556	0.222222	0.333	No	0
785	Jatropha_Control	1	0.166667	1	0.166667	0	0.166667	0	0.166667	1	0.0555556	1	0.0555556	1	0.0555556	0	0.0555556	1	0.0555556	0	0.0555556	0.555556	0.333	Yes	0.555556
786	Jatropha_Control	1	0.166667	1	0.166667	0	0.166667	0	0.166667	0	0.0555556	1	0.0555556	1	0.0555556	0	0.0555556	1	0.0555556	0	0.0555556	0.5	0.333	Yes	0.5
787	Jatropha_Control	0	0.166667	0	0.166667	0	0.166667	0	0.166667	0	0.0555556	1	0.0555556	1	0.0555556	0	0.0555556	1	0.0555556	0	0.0555556	0.166667	0.333	No	0
788	Jatropha_Control	1	0.166667	1	0.166667	0	0.166667	0	0.166667	1	0.0555556	1	0.0555556	1	0.0555556	0	0.0555556	1	0.0555556	0	0.0555556	0.555556	0.333	Yes	0.555556
789	Jatropha_Control	1	0.166667	1	0.166667	0	0.166667	0	0.166667	0	0.0555556	1	0.0555556	1	0.0555556	0	0.0555556	1	0.0555556	0	0.0555556	0.5	0.333	Yes	0.5
790	Jatropha_Control	0	0.166667	0	0.166667	0	0.166667	0	0.166667	1	0.0555556	1	0.0555556	1	0.0555556	0	0.0555556	1	0.0555556	0	0.0555556	0.222222	0.333	No	0
791	Jatropha_Control	0	0.166667	0	0.166667	0	0.166667	0	0.166667	1	0.0555556	1	0.0555556	1	0.0555556	0	0.0555556	1	0.0555556	0	0.0555556	0.222222	0.333	No	0
792	Jatropha_Control	1	0.166667	1	0.166667	0	0.166667	0	0.166667	1	0.0555556	1	0.0555556	1	0.0555556	0	0.0555556	1	0.0555556	0	0.0555556	0.555556	0.333	Yes	0.555556
793	Jatropha_Control	0	0.166667	0	0.166667	0	0.166667	0	0.166667	1	0.0555556	1	0.0555556	1	0.0555556	0	0.0555556	1	0.0555556	0	0.0555556	0.222222	0.333	No	0
794	Jatropha_Control	0	0.166667	0	0.166667	0	0.166667	0	0.166667	1	0.0555556	0	0.0555556	1	0.0555556	1	0.0555556	1	0.0555556	0	0.0555556	0.222222	0.333	No	0
795	Jatropha_Control	0	0.166667	0	0.166667	0	0.166667	0	0.166667	1	0.0555556	0	0.0555556	1	0.0555556	0	0.0555556	1	0.0555556	0	0.0555556	0.166667	0.333	No	0
796	Jatropha_Control	0	0.166667	0	0.166667	0	0.166667	0	0.166667	1	0.0555556	1	0.0555556	1	0.0555556	0	0.0555556	1	0.0555556	0	0.0555556	0.222222	0.333	No	0
797	Jatropha_Control	0	0.166667	0	0.166667	0	0.166667	0	0.166667	0	0.0555556	1	0.0555556	1	0.0555556	0	0.0555556	1	0.0555556	0	0.0555556	0.166667	0.333	No	0
798	Jatropha_Control	0	0.166667	0	0.166667	0	0.166667	0	0.166667	0	0.0555556	1	0.0555556	1	0.0555556	0	0.0555556	1	0.0555556	0	0.0555556	0.166667	0.333	No	0
799	Jatropha_Control	0	0.166667	0	0.166667	0	0.166667	0	0.166667	1	0.0555556	1	0.0555556	1	0.0555556	0	0.0555556	1	0.0555556	0	0.0555556	0.222222	0.333	No	0
800	Jatropha_Control	0	0.166667	0	0.166667	0	0.166667	0	0.166667	0	0.0555556	1	0.0555556	1	0.0555556	0	0.0555556	1	0.0555556	0	0.0555556	0.166667	0.333	No	0
801	Jatropha_Control	1	0.166667	1	0.166667	0	0.166667	0	0.166667	1	0.0555556	1	0.0555556	1	0.0555556	0	0.0555556	1	0.0555556	0	0.0555556	0.555556	0.333	Yes	0.555556
802	Jatropha_Control	0	0.166667	0	0.166667	0	0.166667	0	0.166667	1	0.0555556	1	0.0555556	1	0.0555556	0	0.0555556	1	0.0555556	0	0.0555556	0.222222	0.333	No	0
803	Jatropha_Control	0	0.166667	0	0.166667	0	0.166667	0	0.166667	1	0.0555556	1	0.0555556	1	0.0555556	0	0.0555556	1	0.0555556	0	0.0555556	0.222222	0.333	No	0
804	Jatropha_Control	1	0.166667	1	0.166667	0	0.166667	0	0.166667	1	0.0555556	1	0.0555556	1	0.0555556	0	0.0555556	1	0.0555556	0	0.0555556	0.555556	0.333	Yes	0.555556
805	Jatropha_Control	1	0.166667	1	0.166667	0	0.166667	0	0.166667	1	0.0555556	1	0.0555556	1	0.0555556	0	0.0555556	1	0.0555556	0	0.0555556	0.555556	0.333	Yes	0.555556
806	Jatropha_Control	1	0.166667	1	0.166667	0	0.166667	0	0.166667	1	0.0555556	1	0.0555556	1	0.0555556	0	0.0555556	1	0.0555556	0	0.0555556	0.555556	0.333	Yes	0.555556
807	Jatropha_Control	0	0.166667	0	0.166667	0	0.166667	0	0.166667	1	0.0555556	1	0.0555556	1	0.0555556	0	0.0555556	1	0.0555556	0	0.0555556	0.222222	0.333	No	0
808	Jatropha_Control	0	0.166667	0	0.166667	1	0.166667	0	0.166667	1	0.0555556	1	0.0555556	1	0.0555556	0	0.0555556	1	0.0555556	0	0.0555556	0.388889	0.333	Yes	0.388889
809	Jatropha_Control	1	0.166667	1	0.166667	0	0.166667	0	0.166667	1	0.0555556	1	0.0555556	1	0.0555556	0	0.0555556	1	0.0555556	0	0.0555556	0.555556	0.333	Yes	0.555556
810	Jatropha_Control	1	0.166667	1	0.166667	0	0.166667	0	0.166667	1	0.0555556	1	0.0555556	1	0.0555556	0	0.0555556	1	0.0555556	0	0.0555556	0.555556	0.333	Yes	0.555556
811	Jatropha_Control	1	0.166667	1	0.166667	0	0.166667	0	0.166667	1	0.0555556	1	0.0555556	1	0.0555556	0	0.0555556	1	0.0555556	0	0.0555556	0.555556	0.333	Yes	0.555556
812	Jatropha_Control	0	0.166667	0	0.166667	0	0.166667	0	0.166667	1	0.0555556	1	0.0555556	1	0.0555556	0	0.0555556	1	0.0555556	0	0.0555556	0.222222	0.333	No	0
813	Jatropha_Control	0	0.166667	0	0.166667	1	0.166667	0	0.166667	1	0.0555556	1	0.0555556	1	0.0555556	1	0.0555556	1	0.0555556	0	0.0555556	0.444444	0.333	Yes	0.444444
814	Jatropha_Control	1	0.166667	1	0.166667	0	0.166667	0	0.166667	0	0.0555556	1	0.0555556	1	0.0555556	1	0.0555556	1	0.0555556	0	0.0555556	0.555556	0.333	Yes	0.555556
815	Jatropha_Control	1	0.166667	1	0.166667	1	0.166667	0	0.166667	0	0.0555556	1	0.0555556	1	0.0555556	1	0.0555556	1	0.0555556	0	0.0555556	0.722222	0.333	Yes	0.722222
816	Jatropha_Control	0	0.166667	0	0.166667	1	0.166667	0	0.166667	0	0.0555556	1	0.0555556	1	0.0555556	1	0.0555556	1	0.0555556	0	0.0555556	0.388889	0.333	Yes	0.388889
817	Jatropha_Control	0	0.166667	0	0.166667	0	0.166667	0	0.166667	1	0.0555556	1	0.0555556	1	0.0555556	1	0.0555556	1	0.0555556	0	0.0555556	0.277778	0.333	No	0
818	Jatropha_Control	0	0.166667	0	0.166667	0	0.166667	0	0.166667	0	0.0555556	1	0.0555556	1	0.0555556	1	0.0555556	1	0.0555556	0	0.0555556	0.222222	0.333	No	0
819	Jatropha_Control	1	0.166667	1	0.166667	0	0.166667	0	0.166667	0	0.0555556	1	0.0555556	1	0.0555556	1	0.0555556	1	0.0555556	0	0.0555556	0.555556	0.333	Yes	0.555556
820	Jatropha_Control	1	0.166667	1	0.166667	0	0.166667	0	0.166667	0	0.0555556	1	0.0555556	1	0.0555556	0	0.0555556	1	0.0555556	0	0.0555556	0.5	0.333	Yes	0.5
821	Jatropha_Control	1	0.166667	1	0.166667	0	0.166667	0	0.166667	1	0.0555556	1	0.0555556	1	0.0555556	0	0.0555556	1	0.0555556	0	0.0555556	0.555556	0.333	Yes	0.555556
822	Jatropha_Control	0	0.166667	0	0.166667	0	0.166667	0	0.166667	1	0.0555556	1	0.0555556	1	0.0555556	0	0.0555556	1	0.0555556	0	0.0555556	0.222222	0.333	No	0
823	Jatropha_Control	0	0.166667	0	0.166667	0	0.166667	0	0.166667	1	0.0555556	1	0.0555556	1	0.0555556	0	0.0555556	1	0.0555556	0	0.0555556	0.222222	0.333	No	0
824	Jatropha_Control	0	0.166667	0	0.166667	0	0.166667	0	0.166667	0	0.0555556	1	0.0555556	1	0.0555556	1	0.0555556	1	0.0555556	0	0.0555556	0.222222	0.333	No	0
825	Jatropha_Control	1	0.166667	1	0.166667	0	0.166667	0	0.166667	1	0.0555556	1	0.0555556	1	0.0555556	0	0.0555556	1	0.0555556	0	0.0555556	0.555556	0.333	Yes	0.555556
826	Jatropha_Control	0	0.166667	0	0.166667	0	0.166667	0	0.166667	0	0.0555556	1	0.0555556	1	0.0555556	1	0.0555556	1	0.0555556	0	0.0555556	0.222222	0.333	No	0
827	Jatropha_Control	0	0.166667	0	0.166667	0	0.166667	0	0.166667	1	0.0555556	1	0.0555556	1	0.0555556	0	0.0555556	1	0.0555556	0	0.0555556	0.222222	0.333	No	0
828	Jatropha_Control	0	0.166667	0	0.166667	0	0.166667	0	0.166667	1	0.0555556	1	0.0555556	1	0.0555556	0	0.0555556	1	0.0555556	0	0.0555556	0.222222	0.333	No	0
829	Jatropha_Control	0	0.166667	0	0.166667	0	0.166667	0	0.166667	1	0.0555556	1	0.0555556	1	0.0555556	0	0.0555556	1	0.0555556	0	0.0555556	0.222222	0.333	No	0
830	Jatropha_Control	0	0.166667	0	0.166667	0	0.166667	0	0.166667	1	0.0555556	0	0.0555556	1	0.0555556	0	0.0555556	1	0.0555556	0	0.0555556	0.166667	0.333	No	0
831	Jatropha_Control	1	0.166667	1	0.166667	0	0.166667	0	0.166667	1	0.0555556	1	0.0555556	1	0.0555556	0	0.0555556	1	0.0555556	0	0.0555556	0.555556	0.333	Yes	0.555556
832	Jatropha_Control	0	0.166667	0	0.166667	0	0.166667	0	0.166667	1	0.0555556	1	0.0555556	1	0.0555556	0	0.0555556	1	0.0555556	0	0.0555556	0.222222	0.333	No	0
833	Jatropha_Control	0	0.166667	0	0.166667	0	0.166667	0	0.166667	1	0.0555556	1	0.0555556	1	0.0555556	0	0.0555556	1	0.0555556	0	0.0555556	0.222222	0.333	No	0
834	Jatropha_Control	0	0.166667	0	0.166667	0	0.166667	0	0.166667	1	0.0555556	1	0.0555556	1	0.0555556	0	0.0555556	1	0.0555556	0	0.0555556	0.222222	0.333	No	0
835	Jatropha_Control	0	0.166667	0	0.166667	1	0.166667	0	0.166667	1	0.0555556	1	0.0555556	1	0.0555556	0	0.0555556	1	0.0555556	0	0.0555556	0.388889	0.333	Yes	0.388889
836	Jatropha_Control	1	0.166667	1	0.166667	0	0.166667	0	0.166667	1	0.0555556	1	0.0555556	1	0.0555556	0	0.0555556	1	0.0555556	0	0.0555556	0.555556	0.333	Yes	0.555556
837	Jatropha_Control	0	0.166667	0	0.166667	0	0.166667	0	0.166667	1	0.0555556	1	0.0555556	1	0.0555556	0	0.0555556	1	0.0555556	0	0.0555556	0.222222	0.333	No	0
838	Jatropha_Control	1	0.166667	1	0.166667	0	0.166667	0	0.166667	1	0.0555556	1	0.0555556	1	0.0555556	0	0.0555556	1	0.0555556	0	0.0555556	0.555556	0.333	Yes	0.555556
839	Jatropha_Control	0	0.166667	0	0.166667	0	0.166667	0	0.166667	1	0.0555556	1	0.0555556	1	0.0555556	0	0.0555556	1	0.0555556	0	0.0555556	0.222222	0.333	No	0
840	Jatropha_Control	0	0.166667	0	0.166667	0	0.166667	0	0.166667	1	0.0555556	1	0.0555556	1	0.0555556	0	0.0555556	1	0.0555556	0	0.0555556	0.222222	0.333	No	0
841	Jatropha_Control	0	0.166667	0	0.166667	0	0.166667	0	0.166667	1	0.0555556	1	0.0555556	1	0.0555556	0	0.0555556	1	0.0555556	0	0.0555556	0.222222	0.333	No	0
842	Jatropha_Control	0	0.166667	0	0.166667	0	0.166667	0	0.166667	1	0.0555556	0	0.0555556	1	0.0555556	0	0.0555556	1	0.0555556	0	0.0555556	0.166667	0.333	No	0
843	Jatropha_Control	0	0.166667	0	0.166667	0	0.166667	0	0.166667	1	0.0555556	1	0.0555556	1	0.0555556	0	0.0555556	1	0.0555556	0	0.0555556	0.222222	0.333	No	0
844	Jatropha_Control	1	0.166667	1	0.166667	0	0.166667	0	0.166667	0	0.0555556	1	0.0555556	1	0.0555556	0	0.0555556	1	0.0555556	0	0.0555556	0.5	0.333	Yes	0.5
845	Jatropha_Control	1	0.166667	1	0.166667	0	0.166667	0	0.166667	0	0.0555556	1	0.0555556	1	0.0555556	0	0.0555556	1	0.0555556	0	0.0555556	0.5	0.333	Yes	0.5
846	Jatropha_Control	1	0.166667	1	0.166667	0	0.166667	0	0.166667	0	0.0555556	1	0.0555556	1	0.0555556	0	0.0555556	1	0.0555556	0	0.0555556	0.5	0.333	Yes	0.5
847	Jatropha_Control	1	0.166667	1	0.166667	0	0.166667	0	0.166667	0	0.0555556	1	0.0555556	1	0.0555556	1	0.0555556	1	0.0555556	0	0.0555556	0.555556	0.333	Yes	0.555556
848	Jatropha_Control	0	0.166667	0	0.166667	0	0.166667	0	0.166667	0	0.0555556	1	0.0555556	1	0.0555556	1	0.0555556	1	0.0555556	0	0.0555556	0.222222	0.333	No	0
849	Jatropha_Control	0	0.166667	0	0.166667	0	0.166667	0	0.166667	0	0.0555556	1	0.0555556	1	0.0555556	1	0.0555556	1	0.0555556	0	0.0555556	0.222222	0.333	No	0
850	Jatropha_Control	0	0.166667	0	0.166667	0	0.166667	0	0.166667	0	0.0555556	1	0.0555556	1	0.0555556	1	0.0555556	1	0.0555556	0	0.0555556	0.222222	0.333	No	0

## Sheet: Demographics Used
ID	Observation	Age	HH_Size	HM_Adults	HM_Children	Total_Land	Cultivated_Cropland	Uncultivated_land	IndustrialCrop_Land	Total_income	Expenditure_Total	Food Consumption Score
1	Sugarcane_grower	53	9	4	5	6.5	3	2.5	1	6250	5000	45.5
2	Sugarcane_grower	49	5	3	2	9.5	3	5	1.5	6000	3880	51
3	Sugarcane_grower	45	5	2	3	10	9		1	8690	3450	93
4	Sugarcane_grower	41	7	2	5	4.5	3		1.5	7100	4632	49
5	Sugarcane_grower	54	6	3	3	3.5	2		1.5	6090	4816	51.5
6	Sugarcane_grower	49	7	5	2	7.25	4.25		3	8800	5342	82
7	Sugarcane_grower	43	6	2	4	3.5	2.5		1	5490	4076	84.5
8	Sugarcane_grower	55	8	5	3	2	1		1	6540	4798	60
9	Sugarcane_grower	38	3	2	1	3	2		1	6470	1908	68
10	Sugarcane_grower	36	6	2	4	2	2		2	5850	3706	52.5
11	Sugarcane_grower	37	5	3	2	8	5		3	13680	3580	71.5
12	Sugarcane_grower	40	4	3	1	6	4		2	18594	3754	58
13	Sugarcane_grower	31	3	2	1	6	4		2	8600	3638	46
14	Sugarcane_grower	36	4	2	2	4	2	0.5	1.5	6630	4494	51
15	Sugarcane_grower	51	6	5	1	7	5		2	13940	3886	24
16	Sugarcane_grower	65	6	6	0	8.5	6		2.5	12685	4046	55.5
17	Sugarcane_grower	52	7	2	5	3.5	2		1.5	5200	4362	72.5
18	Sugarcane_grower	50	5	4	1	10	4		6	15650	4970	34
19	Sugarcane_grower	64	4	4	0	4.5	3		1.5	3750	2884	65
20	Sugarcane_grower	49	4	2	2	12.5	7.5		5	14645	3194	40
21	Sugarcane_grower	60	6	4	2	19	10	5	4	14200	4759	67
22	Sugarcane_grower	50	7	5	2	20	8	9	3	12800	4642	15.5
23	Sugarcane_grower	43	4	3	1	6	4	0	2	9100	4504	49
24	Sugarcane_grower	35	5	3	2	4	1	1.5	1.5	9036	3110	43.5
25	Sugarcane_grower	56	6	5	1	9	6	0	3	8130	4086	4
26	Sugarcane_grower	43	3	3	0	2	2		2	6261	3118	83
27	Sugarcane_grower	44	5	2	3	20	20		10	26120	5670	57
28	Sugarcane_grower	39	3	3	0	4.5	3		1.5	5010	2138	56.5
29	Sugarcane_grower	45	3	2	1	4.5	3		1.5	5898	2078	59.5
30	Sugarcane_grower	67	2	2	0	3	2		1	7890	1412	56.5
31	Sugarcane_grower	38	4	3	1	6	4		2	14416	3154	71
32	Sugarcane_grower	52	4	3	1	8	5		3	9301	4354	59.5
33	Sugarcane_grower	59	8	5	3	10	7		3	11890	5298	42
34	Sugarcane_grower	63	6	4	2	12	6	3	3	8930	4026	48
35	Sugarcane_grower	37	3	2	1	1.75	1		0.75	3128	2188	50
36	Sugarcane_grower	37	5	2	3	7	4		3	10025	4560	33
37	Sugarcane_grower	30	5	4	1	1.5	1.5		1	5525	3170	50.5
38	Sugarcane_grower	40	8	3	5	5.5	4.5		1	6300	4678	48.5
39	Sugarcane_grower	45	6	2	4	22	20		2	8100	4006	70.5
40	Sugarcane_grower	45	8	5	3	3	2		1	8422	5418	81
41	Sugarcane_grower	32	5	4	1	7	4		3	23300	5320	18
42	Sugarcane_grower	55	6	3	3	19	15		2	5000	3766	65.5
43	Sugarcane_grower	43	3	3	0	3.5	2		1.5	7585	1998	63
44	Sugarcane_grower	27	5	4	1	9	8		1	5420	3070	65.5
45	Sugarcane_grower	63	6	6	0	3.5	2		1.5	7400	3846	89
46	Sugarcane_grower	50	3	3	0	9.5	5	1	3.5	10016	3598	78
47	Sugarcane_grower	50	5	3	2	2	1		1	7051	3295	80
48	Sugarcane_grower	59	3	3	0	20	10		10	35119	4698	78
49	Sugarcane_grower	33	4	3	1	5	3		2	11020	2754	94.5
50	Sugarcane_grower	35	5	3	2	7	5		2	18501	3810	80
51	Sugarcane_grower	52	6	3	3	3	3		2	8300	4566	84
52	Sugarcane_grower	49	5	5	0	13	6.5		6.5	24000	4330	82.5
53	Sugarcane_grower	68	4	4	0	9.5	2	5	2.5	8400	3314	64.5
54	Sugarcane_grower	52	4	4	0	3	2		1	2890	2514	45.5
55	Sugarcane_grower	52	6	3	3	4.5	1.5	1.5	1.5	3950	3666	42
56	Sugarcane_grower	45	7	4	3	6	2	2	2	8600	4382	49.5
57	Sugarcane_grower	37	3	1	2	3	1	1	1	5200	2278	35.5
58	Sugarcane_grower	47	5	4	1	18	15		3	21550	3470	58
59	Sugarcane_grower	40	4	3	1	6	3		3	11060	2854	62
60	Sugarcane_grower	24	5	2	3	1	0.5		0.5	6910	3950	74
61	Sugarcane_grower	61	4	4	0	3.5	2	0.5	1	14700	2614	81.5
62	Sugarcane_grower	71	5	4	1	4	2		2	18900	3270	94
63	Sugarcane_grower	40	3	3	0	19	11		8	27200	3298	50.5
64	Sugarcane_grower	49	5	3	2	3.5	2	0.5	1	3000	2590	49
65	Sugarcane_grower	26	3	2	1	2	1		1	4371	1838	60
66	Sugarcane_grower	46	7	5	2	15	7	4	4	17835	4842	59.5
67	Sugarcane_grower	47	5	3	2	17	12		5	17382	3810	63.5
68	Sugarcane_grower	58	5	4	1	27	14	5	8	20860	4470	88
69	Sugarcane_grower	45	5	3	2	4	1	1	2	6000	3310	46
70	Sugarcane_grower	42	6	2	4	4.5	2	2	0.5	3780	3106	32.5
71	Sugarcane_grower	65	6	4	2	3	3		2	5000	3826	76.5
72	Sugarcane_grower	50	6	3	3	7.5	4	1.5	2	5034	4266	54
73	Sugarcane_grower	45	8	4	4	6	1.5	1.5	3	7500	5638	31
74	Sugarcane_grower	49	7	4	3	3	1.5		1.5	10250	4782	94
75	Sugarcane_grower	39	7	2	5	6	5.5		0.5	4885	4462	62.5
76	Sugarcane_grower	34	4	2	2	3	2		1	5780	2894	38
77	Sugarcane_grower	40	3	1	2	4.5	3	0.5	1	11562	2278	89
78	Sugarcane_grower	46	5	2	3	3.5	1.75	0.5	1.25	4125	3500	33.5
79	Sugarcane_grower	46	5	3	2	4.5	2	2	0.5	8200	3410	97
80	Sugarcane_grower	43	9	6	3	13	7	2	4	14600	6514	61
81	Sugarcane_grower	45	5	4	1	7	5		2	11750	3770	102.5
82	Sugarcane_grower	47	5	4	1	6.5	4.5		2	10480	3770	78
83	Sugarcane_grower	31	5	4	1	8	5		3	21130	3970	73.5
84	Sugarcane_grower	42	5	2	3	6.5	4		2.5	9850	3750	70
85	Sugarcane_grower	55	3	2	1	25	15		10	34630	4138	49.5
86	Sugarcane_grower	51	6	3	3	7	4	2	1	11530	4066	55
87	Sugarcane_grower	46	6	3	3	18	12	4	2	13870	4266	55.5
88	Sugarcane_grower	56	4	2	2	13	4	7	2	10000	3094	53.5
89	Sugarcane_grower	35	6	2	4	4	3		1	8750	4006	93
90	Sugarcane_grower	59	6	5	1	13	8		5	21700	4986	85
91	Sugarcane_grower	36	4	3	1	12	7		5	15500	3754	59
92	Sugarcane_grower	56	4	3	1	35	20		5	13600	3754	90
93	Sugarcane_grower	38	5	5	0	5	3		2	6264	3830	50.5
94	Sugarcane_grower	57	6	2	4	16	10	3	3	13050	4406	97
95	Sugarcane_grower	35	4	3	1	4.5	3	0	1.5	6110	3054	73
96	Sugarcane_grower	45	3	2	1	14	4	6	4	15181	2938	70.5
97	Sugarcane_grower	46	3	3	0	4	2.5	0	1.5	4290	2498	87
98	Sugarcane_grower	53	3	3	0	2.5	2.5	0	2	6100	2598	50.5
99	Sugarcane_grower	57	6	2	4	16	10	3	3	10660	4406	97
100	Sugarcane_grower	35	4	3	1	4.5	3	0	1.5	6993	3054	73
101	Sugarcane_control	52	6	3	3	10	8	2		8200	4106	34
102	Sugarcane_control	52	6	5	1	7	6	1		6920	3806	39.5
103	Sugarcane_control	70	8	5	3	11	9	2		6300	4648	35
104	Sugarcane_control	45	4	2	2	4	4	0		4800	2194	38
105	Sugarcane_control	47	7	5	2	10	5	5		11700	6142	31
106	Sugarcane_control	65	7	4	3	15	12	3		9700	5442	30
107	Sugarcane_control	63	7	4	3	14	11	3		9900	5442	26.5
108	Sugarcane_control	50	7	5	2	14	10	4		6300	5322	33
109	Sugarcane_control	43	7	5	2	13	10	3		8000	5002	27
110	Sugarcane_control	51	6	4	2	12	7	5		7300	5526	45
111	Sugarcane_control	44	6	4	2	11	11	0		10900	3926	49
112	Sugarcane_control	60	7	5	2	13	10	3		7000	5002	23
113	Sugarcane_control	52	3	2	1	3	3	0		11400	1638	44.5
114	Sugarcane_control	54	5	3	2	6	3	3		4700	3770	41
115	Sugarcane_control	59	3	2	1	8	4	4		4200	2918	54
116	Sugarcane_control	70	11	6	5	24	12	12		21160	11366	49
117	Sugarcane_control	48	6	3	3	6	6	0		6200	3366	27
118	Sugarcane_control	57	5	3	2	8	4	4		5507	4090	34.5
119	Sugarcane_control	50	3	2	1	1	1	0		2220	1638	48
120	Sugarcane_control	51	3	2	1	10	3	7		6900	3878	36
121	Sugarcane_control	36	3	3	0	2	2	0		2540	2098	52.5
122	Sugarcane_control	46	5	3	2	2	2	0		4435	3760	43
123	Sugarcane_control	55	3	2	1	16	6	10		6600	4838	54
124	Sugarcane_control	57	5	5	0	4	4	0		3490	2930	47
125	Sugarcane_control	73	6	6	0	6	2	4		4720	3746	47.5
126	Sugarcane_control	42	7	6	1	2	2	0		3420	2920	22.5
127	Sugarcane_control	40	3	1	2	1	1	0		3300	2398	50.5
128	Sugarcane_control	53	4	3	1	3	3	0		4412	3874	43
129	Sugarcane_control	39	4	3	1	2	2	0		3370	2254	49
130	Sugarcane_control	49	5	2	3	26	20	6		8500	4670	59
131	Sugarcane_control	53	11	6	5	2	0	2		4996	3990	45
132	Sugarcane_control	24	3	2	1	1	1	0		3850	1638	56
133	Sugarcane_control	35	4	4	0	6	4	2		12960	3454	52.5
134	Sugarcane_control	40	5	2	3	2	2			3600	3050	69
135	Sugarcane_control	34	4	3	1	10	10			6100	2954	58
136	Sugarcane_control	61	4	4	0	8	8			7120	3414	49
137	Sugarcane_control	26	5	4	1	2	2			3900	2750	67
138	Sugarcane_control	58	5	4	1	6	6			8850	3470	60
139	Sugarcane_control	60	5	4	1	4	4			3502	3070	72
140	Sugarcane_control	38	4	3	1	13.5	13.5			10970	3054	67
141	Sugarcane_control	33	4	3	1	4.5	4.5			16210	2614	67.5
142	Sugarcane_control	42	4	3	1	4	4			3880	2354	69
143	Sugarcane_control	48	6	4	2	2.5	2.5			7025	4386	54.5
144	Sugarcane_control	43	4	2	2	1.5	1.5			3320	3094	59.5
145	Sugarcane_control	40	6	4	2	2.5	1.5	1		2400	1990	31.5
146	Sugarcane_control	44	6	3	3	4	2	2		4500	2700	41.5
147	Sugarcane_control	55	11	6	5	19	2	17		6600	4750	68.5
148	Sugarcane_control	47	3	3	0	7	7			2320	1698	36
149	Sugarcane_control	49	3	2	1	3	3			9700	1638	55.5
150	Sugarcane_control	45	3	1	2	3	3			2660	1628	52.5
151	Sugarcane_control	60	6	3	3	1	1			5000	3256	37.5
152	Sugarcane_control	57	3	2	1	16	16			7640	1638	45.5
153	Sugarcane_control	55	2	2	0	20	10	10		6630	4282	50
154	Sugarcane_control	29	5	3	2	3	3	0		10900	2810	36
155	Sugarcane_control	35	5	3	2	2.5	2.5	0		6200	2810	57
156	Sugarcane_control	40	6	2	4	2.5	1	1.5		4700	3356	56.5
157	Sugarcane_control	37	3	1	2	2	1	1		3130	1898	41
158	Sugarcane_control	50	5	3	2	2	1	1		4000	3130	51.5
159	Sugarcane_control	45	9	5	4	2	2	0		5100	3990	39.5
160	Sugarcane_control	62	6	4	2	5	5	0		6301	3626	36.5
161	Sugarcane_control	55	5	4	1	3	3	0		4600	3590	51.5
162	Sugarcane_control	42	4	3	1	6	6	0		4640	3294	76
163	Sugarcane_control	40	6	3	3	2	2	0		2800	2520	81
164	Sugarcane_control	52	6	3	3	3	2	1		4450	3686	61
165	Sugarcane_control	56	3	2	1	4	2	2		3600	2278	46.5
166	Sugarcane_control	58	3	2	1	2	2	0		7612	1638	68
167	Sugarcane_control	63	3	2	1	17	17	0		7601	1638	64.5
168	Sugarcane_control	49	4	3	1	6	6	0		6950	2754	45.5
169	Sugarcane_control	50	4	3	1	9	9	0		5807	2754	59.5
170	Sugarcane_control	71	3	2	1	26	20	6		11605	4058	45.5
171	Sugarcane_control	62	3	2	1	6	6	0		10600	2138	59.5
172	Sugarcane_control	51	3	2	1	7	7	0		7650	1638	52.5
173	Sugarcane_control	68	3	2	1	10	8	2		7820	2778	69
174	Sugarcane_control	40	3	2	1	11	11	0		5170	2138	55
175	Sugarcane_control	50	7	2	5	20	10	10		8380	7562	65.5
176	Sugarcane_control	60	4	3	1	11	8	3		11268	3714	72
177	Sugarcane_control	26	3	2	1	3	3	0		3210	2138	69.5
178	Sugarcane_control	35	5	4	1	2	2	0		3900	2470	76.5
179	Sugarcane_control	36	4	3	1	8	8	0		13350	2754	93.5
180	Sugarcane_control	42	4	3	1	4	4	0		10900	2754	100
181	Sugarcane_control	41	4	3	1	2.5	2.5	0		4000	2254	70
182	Sugarcane_control	56	5	3	2	10	6.5	3.5		8140	3930	84.5
183	Sugarcane_control	31	4	4	0	5.5	3.5	2		9000	2954	36
184	Sugarcane_control	48	5	3	2	9	7	2		3500	3110	77.5
185	Sugarcane_control	42	8	4	4	4.5	4.5	0		4300	3670	32.5
186	Sugarcane_control	41	4	3	1	2.5	2.5	0		3120	2254	41.5
187	Sugarcane_control	39	4	2	2	2	2	0		3960	2194	58
188	Sugarcane_control	48	8	4	4	3	3	0		3400	3160	49
189	Sugarcane_control	35	5	4	1	2	2	0		3300	2870	37.5
190	Sugarcane_control	39	4	2	2	8	8	0		8800	2194	87.5
191	Sugarcane_control	42	6	3	3	0.5	0	0.5		5800	3526	31.5
192	Sugarcane_control	56	5	4	1	1	1	0		3120	2870	31.5
193	Sugarcane_control	57	3	2	1	4	4	0		4400	1638	31
194	Sugarcane_control	39	7	4	3	26	10	16		9800	5482	50
195	Sugarcane_control	49	6	3	3	10	8	2		4900	4006	50.5
196	Sugarcane_control	52	6	5	1	7	6	1		4220	3406	61
197	Sugarcane_control	70	8	5	3	11	9	2		6030	5238	71.5
198	Sugarcane_control	49	6	3	3	10	8	2		5900	4006	50.5
199	Sugarcane_control	52	6	5	1	7	6	1		4070	3806	63.5
200	Sugarcane_control	70	8	5	3	11	9	2		8800	5238	50.5
201	Oilpalm_Worker	37	1	1	0					6000	2506	44.5
202	Oilpalm_Worker	38	3	1	2					6000	3098	51
203	Oilpalm_Worker	25	2	2	0					12000	3282	64
204	Oilpalm_Worker	31	4	2	2					8400	3994	14
205	Oilpalm_Worker	22	2	2	0					4800	3860	53
206	Oilpalm_Worker	32	5	3	2	4	4			8400	4170	51
207	Oilpalm_Worker	25	2	2	0	0	0			11160	9350	47.5
208	Oilpalm_Worker	18	2	2	0	0	0			4848	4050	45
209	Oilpalm_Worker	36	4	3	1	0	0			8400	6134	36
210	Oilpalm_Worker	27	3	2	1	0	0			3840	3698	25
211	Oilpalm_Worker	43	7	4	3	2	2			5130	4802	60.5
212	Oilpalm_Worker	28	2	2	0	0	0			9600	7650	80
213	Oilpalm_Worker	30	2	2	0	1	1			11000	7400	65.5
214	Oilpalm_Worker	23	2	2	0	0	0			13200	8550	58
215	Oilpalm_Worker	37	6	4	2	3	3			6800	6346	59.5
216	Oilpalm_Worker	35	5	3	2	4	4			6202	3800	68
217	Oilpalm_Worker	30	4	3	1	0	0			6000	5554	70.5
218	Oilpalm_Worker	28	5	3	2	6	6			12740	5970	66
219	Oilpalm_Worker	50	6	4	2	8	8			4700	3986	63
220	Oilpalm_Worker	24	2	2	0	0	0			6288	2682	64.5
221	Oilpalm_Worker	26	2	2	0	0	0			9600	2322	65.5
222	Oilpalm_Worker	47	3	2	1	2	2			3360	2738	68
223	Oilpalm_Worker	26	1	1	0	0	0			3360	1666	55
224	Oilpalm_Worker	30	1	1	0	0	0			5040	2146	62
225	Oilpalm_Worker	40	3	2	1	2	2			4800	3458	62.5
226	Oilpalm_Worker	32	3	2	1	3	3			4700	3698	55.5
227	Oilpalm_Worker	60	2	2	0	2	2			3600	882	59.5
228	Oilpalm_Worker	35	2	2	0	2	2			4320	882	64.5
229	Oilpalm_Worker	43	2	2	0	0	0			4200	2202	44
230	Oilpalm_Worker	31	3	2	1	0	0			4260	3698	45.5
231	Oilpalm_Worker	28	1	1	0	2	2			1800	466	56.5
232	Oilpalm_Worker	36	2	2	0	0	0			1860	1482	57
233	Oilpalm_Worker	32	2	2	0	0	0			2428	882	52
234	Oilpalm_Worker	30	3	2	1	0	0			3540	2978	53.5
235	Oilpalm_Worker	43	2	2	0	0	0			1800	1122	53.5
236	Oilpalm_Worker	20	1	1	0	0	0			1440	466	56.5
237	Oilpalm_Worker	26	2	2	0	0	0			2550	1962	48
238	Oilpalm_Worker	40	2	2	0	0	0			1800	882	53.5
239	Oilpalm_Worker	23	2	2	0	0	0			3420	2202	52
240	Oilpalm_Worker	28	2	2	0	2	2			1875	1506	53.5
241	Oilpalm_Worker	37	5	4	1	19	14			8818	4410	68
242	Oilpalm_Worker	40	2	2	0	0	0			4200	3282	70.5
243	Oilpalm_Worker	34	2	2	0	0	0			2448	1582	80
244	Oilpalm_Worker	31	2	2	0	0	0			2736	2532	54
245	Oilpalm_Worker	59	3	2	1	0	0			7676	4338	74.5
246	Oilpalm_Worker	30	2	2	0	0	0			7830	5222	76.5
247	Oilpalm_Worker	36	2	2	0	0	0			9000	6262	69
248	Oilpalm_Worker	52	2	2	0	12	7			4836	2922	72.5
249	Oilpalm_Worker	40	2	2	0	0	0			7875	4622	77.5
250	Oilpalm_Worker	42	2	2	0	0	0			8820	6222	74.5
251	Oilpalm_Worker	27	2	2	0	0	0			7490	2922	68
252	Oilpalm_Worker	55	2	2	0	12	7			4388	2562	68.5
253	Oilpalm_Worker	24	2	2	0	0	0			8640	4562	66
254	Oilpalm_Worker	42	3	2	1	0	0			9984	5638	77
255	Oilpalm_Worker	43	2	2	0	7	7			5705	2322	74
256	Oilpalm_Worker	27	3	2	1	0	0			8070	3698	74
257	Oilpalm_Worker	48	2	2	0	4	0	4		3840	1962	63
258	Oilpalm_Worker	31	2	2	0	0	0	0		6000	2682	85.5
259	Oilpalm_Worker	29	3	2	1	0	0	0		6276	3098	77
260	Oilpalm_Worker	42	2	2	0	0	0	0		2700	2202	70
261	Oilpalm_Worker	30	3	2	1	2	2	0		3300	3098	62.5
262	Oilpalm_Worker	40	2	2	0	3	0	3		3618	3282	61
263	Oilpalm_Worker	35	2	2	0	0	0	0		3940	2682	42
264	Oilpalm_Worker	43	2	2	0	0	0	0		3240	2682	49
265	Oilpalm_Worker	42	2	2	0	0	0	0		3240	1962	43
266	Oilpalm_Worker	31	3	2	1	2	2	0		3280	1898	76.5
267	Oilpalm_Worker	39	2	2	0	0	0	0		6820	2562	67
268	Oilpalm_Worker	27	2	2	0	0	0	0		6128	2922	67
269	Oilpalm_Worker	27	2	2	0	0	0	0		5616	2682	58
270	Oilpalm_Worker	33	2	2	0	10	6	4		8404	2922	69
271	Oilpalm_Worker	32	2	2	0	0	0	0		5400	1962	30
272	Oilpalm_Worker	23	2	2	0	5	5	0		5400	2562	14
273	Oilpalm_Worker	27	2	2	0	0	0	0		5940	1722	62.5
274	Oilpalm_Worker	53	2	2	0	0	0	0		7084	1962	86
275	Oilpalm_Worker	23	2	2	0	5	0	5		5540	2562	35
276	Oilpalm_Worker	23	3	2	1	0	0	0		5400	2378	35
277	Oilpalm_Worker	24	2	2	0	0	0	0		5520	2562	27.5
278	Oilpalm_Worker	31	2	2	0	4	4	0		5744	2562	41
279	Oilpalm_Worker	21	2	2	0	7	7	0		5860	2562	65
280	Oilpalm_Worker	32	2	2	0	0	0	0		5400	2802	48
281	Oilpalm_Worker	49	2	2	0	0	0	0		5400	2322	48
282	Oilpalm_Worker	38	3	2	1	0	0	0		5400	2978	23
283	Oilpalm_Worker	42	2	2	0	0	0	0		5400	3162	55
284	Oilpalm_Worker	33	2	2	0	5	0	5		8850	2922	61
285	Oilpalm_Worker	42	2	2	0	7	7	0		6200	2562	35
286	Oilpalm_Worker	27	3	2	1	0	0	0		8600	3218	51.5
287	Oilpalm_Worker	25	2	2	0	0	0	0		5480	2202	57
288	Oilpalm_Worker	32	2	2	0	0	0	0		5630	1962	71
289	Oilpalm_Worker	27	2	2	0	0	0	0		7700	2802	60.5
290	Oilpalm_Worker	21	2	2	0	0	0	0		4200	2922	66
291	Oilpalm_Worker	25	3	2	1	0	0	0		8000	3698	55
292	Oilpalm_Worker	31	2	2	0	8	8	0		3860	2922	57
293	Oilpalm_Worker	24	2	2	0	0	0	0		5400	2682	20
294	Oilpalm_Worker	43	3	2	1	0	0	0		9000	2378	42
295	Oilpalm_Worker	32	2	2	0	0	0	0		6396	2682	34
296	Oilpalm_Worker	24	2	2	0	0	0	0		5800	1462	56
297	Oilpalm_Worker	28	2	2	0	0	0	0		5850	2922	65.5
298	Oilpalm_Worker	33	3	2	1	0	0	0		8020	3388	45
299	Oilpalm_Worker	54	2	2	0	0	0	0		5400	2922	63.5
300	Oilpalm_Worker	32	3	2	1	0	0	0		5400	3338	68
301	Oilpalm_Outgrower	48	4	3	1	4	0	0	4	11400	5034	64.5
302	Oilpalm_Outgrower	35	3	2	1	9	5	0	4	6900	3858	65.5
303	Oilpalm_Outgrower	40	7	2	5	5	3	0	2	6024	5632	96
304	Oilpalm_Outgrower	41	6	2	4	45	15	25	5	10000	7121	82.5
305	Oilpalm_Outgrower	52	7	5	2	14	10	0	4	6995	7562	64.5
306	Oilpalm_Outgrower	70	4	4	0	27	15	7	5	9087	4469	64.5
307	Oilpalm_Outgrower	54	6	6	0	19	12	2	5	11400	6041	23.5
308	Oilpalm_Outgrower	67	4	4	0	12	8	0	4	12800	4114	23.5
309	Oilpalm_Outgrower	52	2	2	0	14	10	0	4	10600	6902	75.5
310	Oilpalm_Outgrower	39	2	2	0	16	12	0	4	10000	7882	75.5
311	Oilpalm_Outgrower	40	3	3	0	19	15	0	4	11200	10228	75.5
312	Oilpalm_Outgrower	61	3	3	0	11	5	0	6	9600	5038	79
313	Oilpalm_Outgrower	45	3	3	0	15	6	3	6	9600	5088	62
314	Oilpalm_Outgrower	49	3	2	1	11	5.5	0	5.5	10350	4730.5	66
315	Oilpalm_Outgrower	38	5	3	2	16	11	0	5	11040	7195	61.5
316	Oilpalm_Outgrower	54	6	5	1	23	16	0	7	15200	7821	54
317	Oilpalm_Outgrower	44	8	4	4	14	9	0	5	21100	8293	58
318	Oilpalm_Outgrower	40	5	3	2	25	18	0	7	16140	7905	59.5
319	Oilpalm_Outgrower	42	5	4	1	11	6	0	5	8000	6325	54
320	Oilpalm_Outgrower	55	3	2	1	14	10	0	4	8000	5698	48
321	Oilpalm_Outgrower	61	3	1	2	20	15	0	5	8900	5623	52.5
322	Oilpalm_Outgrower	35	5	1	4	4	0	0	4	6400	5380	55.5
323	Oilpalm_Outgrower	42	7	3	4	14	7	0	7	11200	8667	58.5
324	Oilpalm_Outgrower	56	1	1	0	6	3	0	3	4800	2451	58.5
325	Oilpalm_Outgrower	56	3	3	0	8	4	0	4	6400	5578	42
326	Oilpalm_Outgrower	38	3	1	2	4	2	0	2	4700	3358	54
327	Oilpalm_Outgrower	51	1	1	0	6	3	0	3	4800	2401	53
328	Oilpalm_Outgrower	58	6	4	2	20	10	0	10	16000	7856	40
329	Oilpalm_Outgrower	64	5	5	0	19	12	2	5	16085	5255	29
330	Oilpalm_Outgrower	66	6	6	0	20	14	2	4	13000	6286	34
331	Oilpalm_Outgrower	51	6	5	1	10	6	0	4	6700	6256	58
332	Oilpalm_Outgrower	65	5	5	0	25	16	0	9	26950	8075	62.5
333	Oilpalm_Outgrower	42	7	4	3	7	4	0	3	9300	7627	62.5
334	Oilpalm_Outgrower	31	2	2	0	4	2	0	2	6160	4082	74
335	Oilpalm_Outgrower	49	7	4	3	22	12	4	6	20230	7992	73.5
336	Oilpalm_Outgrower	36	7	3	4	16	8	4	4	12430	8152	80.5
337	Oilpalm_Outgrower	60	7	5	2	28	17	5	6	19660	8122	81.5
338	Oilpalm_Outgrower	49	7	4	3	17	9	4	4	14520	6832	71.5
339	Oilpalm_Outgrower	48	5	4	1	8	4	0	4	7600	6320	62
340	Oilpalm_Outgrower	65	9	6	3	41	29	0	12	32570	11894	70.5
341	Oilpalm_Outgrower	52	8	6	2	33	17	5	11	23000	10713	68.5
342	Oilpalm_Outgrower	49	5	4	1	30	21	0	9	15950	8115	70
343	Oilpalm_Outgrower	43	4	2	2	8	4	0	4	6400	4854	54.5
344	Oilpalm_Outgrower	67	5	2	3	25	5	16	4	6685	5510	69.5
345	Oilpalm_Outgrower	36	6	3	3	24	11	7	6	18650	8356	75.5
346	Oilpalm_Outgrower	38	8	4	4	18	10	4	4	15520	7938	77.5
347	Oilpalm_Outgrower	41	7	4	3	18	10	4	4	14470	6982	66
348	Oilpalm_Outgrower	59	8	6	2	57	33	18	6	16800	8308	70.5
349	Oilpalm_Outgrower	51	5	2	3	13	8	2	3	13205	5755	68
350	Oilpalm_Outgrower	48	4	4	0	21	9	7	5	21180	5669	62.5
351	Oilpalm_Outgrower	52	6	2	4	54	10	40	4	8470	6166	70.5
352	Oilpalm_Outgrower	63	4	2	2	8	4	0	4	6721	4854	66
353	Oilpalm_Outgrower	58	3	1	2	25	4	17	4	6665	4068	67
354	Oilpalm_Outgrower	44	2	2	0	21	17	0	4	11200	6742	75.5
355	Oilpalm_Outgrower	41	4	3	1	14	10	0	4	13330	6434	92.5
356	Oilpalm_Outgrower	40	2	2	0	23	18	0	5	11600	5477	76.5
357	Oilpalm_Outgrower	45	4	3	1	16	12	0	4	11630	7384	92.5
358	Oilpalm_Outgrower	39	5	2	3	16	9	0	7	12400	6875	39.5
359	Oilpalm_Outgrower	60	4	3	1	30	24	0	6	14690	6624	71
360	Oilpalm_Outgrower	60	4	3	1	25	20	0	5	11780	6439	71
361	Oilpalm_Outgrower	56	3	2	1	16	6	6	4	9200	4198	52.5
362	Oilpalm_Outgrower	50	6	4	2	24	15	0	9	16460	8213	50.5
363	Oilpalm_Outgrower	40	2	2	0	30	15	0	15	26400	7757	69
364	Oilpalm_Outgrower	50	2	2	0	15	10	0	5	11600	4327	69
365	Oilpalm_Outgrower	39	2	2	0	16	8	0	8	18800	5392	69
366	Oilpalm_Outgrower	50	2	2	0	14	7	0	7	13600	5037	69
367	Oilpalm_Outgrower	40	3	2	1	36	21	0	15	25200	8103	48
368	Oilpalm_Outgrower	44	4	3	1	12	7	0	5	8000	7339	67
369	Oilpalm_Outgrower	37	3	2	1	26	16	0	10	18400	16328	61.5
370	Oilpalm_Outgrower	56	3	2	1	11	7	0	4	7300	7198	62.5
371	Oilpalm_Outgrower	48	3	2	1	18	11	0	7	11850	5265	43
372	Oilpalm_Outgrower	49	3	2	1	18	12	0	6	10950	4909	66.5
373	Oilpalm_Outgrower	38	3	2	1	26	16	0	10	19500	14328	57.5
374	Oilpalm_Outgrower	50	4	3	1	9	5	0	4	6400	4985	60.5
375	Oilpalm_Outgrower	40	3	2	1	23	14	0	9	23720	5973	48
376	Oilpalm_Outgrower	52	6	6	0	26	18	0	8	18550	7106	40
377	Oilpalm_Outgrower	64	6	6	0	24	14	2	8	15200	7106	39.5
378	Oilpalm_Outgrower	48	6	5	1	24	14	2	8	15374	6976	33.5
379	Oilpalm_Outgrower	50	3	2	1	14	6	0	8	18800	7718	71
380	Oilpalm_Outgrower	40	3	2	1	14	7	0	7	11200	6963	74.5
381	Oilpalm_Outgrower	50	4	2	2	8	4	0	4	6400	5454	49
382	Oilpalm_Outgrower	45	2	2	0	8	4	0	4	6400	4142	48
383	Oilpalm_Outgrower	55	3	2	1	12	6	0	6	9603	4958	62.5
384	Oilpalm_Outgrower	55	3	1	2	10	6	0	4	6400	5318	44
385	Oilpalm_Outgrower	39	4	3	1	11	7	0	4	6400	6184	42
386	Oilpalm_Outgrower	48	4	3	1	15	9	0	6	11850	5744	77
387	Oilpalm_Outgrower	42	4	2	2	25	4	17	4	7200	4904	65
388	Oilpalm_Outgrower	45	3	2	1	11.5	7.5	0	4	9406	4248	60.5
389	Oilpalm_Outgrower	50	4	3	1	12	7	0	5	10300	5389	63
390	Oilpalm_Outgrower	63	4	3	1	9	7	0	2	6400	3574	71.5
391	Oilpalm_Outgrower	60	5	3	2	11	5	2	4	8150	6240	82.5
392	Oilpalm_Outgrower	46	4	4	0	16	10	1	5	18050	5669	63.5
393	Oilpalm_Outgrower	39	5	4	1	33	23	0	10	20501	7600	78
394	Oilpalm_Outgrower	55	5	5	0	15	9	0	6	30400	6315	63.5
395	Oilpalm_Outgrower	60	6	5	1	17	10	0	7	17520	7651	69
396	Oilpalm_Outgrower	48	3	3	0	30	15	0	15	24000	9653	53.5
397	Oilpalm_Outgrower	38	4	3	1	12	8	0	4	15600	6234	56.5
398	Oilpalm_Outgrower	46	2	1	1	18	5.5	9.5	3	6850	3057	80.5
399	Oilpalm_Outgrower	58	5	3	2	22	12	0	10	19200	7820	73
400	Oilpalm_Outgrower	58	6	5	1	22	15	0	7	20200	8501	58
401	Oilpalm_Independent_smallholder	75	11	6	5	29	2	17	2	13047	9706	55.5
402	Oilpalm_Independent_smallholder	41	5	4	1	8	3	0	5	10085	6375	63
403	Oilpalm_Independent_smallholder	48	3	2	1	25	3	17	5	10840	4063	57.5
404	Oilpalm_Independent_smallholder	45	5	4	1	14	3	1	10	21592	7150	47
405	Oilpalm_Independent_smallholder	37	7	3	4	12	4	3	5	10920	8547	60.5
406	Oilpalm_Independent_smallholder	36	4	3	1	7	2	0	5	33000	5919	68
407	Oilpalm_Independent_smallholder	45	7	4	3	16	7	4	5	12450	8367	79
408	Oilpalm_Independent_smallholder	32	6	3	3	15	7	4	4	9190	7256	76.5
409	Oilpalm_Independent_smallholder	65	2	2	0	22	17	0	5	12540	3167	53
410	Oilpalm_Independent_smallholder	38	3	2	1	27	18	0	9	20790	6263	79
411	Oilpalm_Independent_smallholder	61	4	2	2	22	12	0	10	25860	7670	76
412	Oilpalm_Independent_smallholder	49	3	2	1	28	18	0	10	24500	7530	76
413	Oilpalm_Independent_smallholder	31	9	6	3	13	8	0	5	14080	10039	52
414	Oilpalm_Independent_smallholder	55	8	5	3	12	4	5	3	14300	9393	86.5
415	Oilpalm_Independent_smallholder	43	4	2	2	12	5	0	7	20970	6469	57.5
416	Oilpalm_Independent_smallholder	50	6	4	2	50.5	40	0	10.5	28700	8223.5	60.5
417	Oilpalm_Independent_smallholder	65	3	2	1	50	40	0	10	24400	6318	79.5
418	Oilpalm_Independent_smallholder	64	3	2	1	28	18	0	10	21875	6726	79
419	Oilpalm_Independent_smallholder	47	6	4	2	11	5	3	3	6200	5561	60
420	Oilpalm_Independent_smallholder	65	4	3	1	34	24	0	10	20620	7094	65.5
421	Oilpalm_Independent_smallholder	32	4	3	1	20	10	0	10	18830	6494	38
422	Oilpalm_Independent_smallholder	28	4	3	1	8	4	0	4	11000	4364	35.5
423	Oilpalm_Independent_smallholder	32	3	2	1	10	5	0	5	11400	4843	78
424	Oilpalm_Independent_smallholder	72	3	2	1	16	2	12	2	3600	2998	28.5
425	Oilpalm_Independent_smallholder	43	5	3	2	8	4	0	4	8400	5260	58.5
426	Oilpalm_Independent_smallholder	54	4	3	1	8	4	0	4	7200	4364	62
427	Oilpalm_Independent_smallholder	40	5	3	2	30	11	9	10	18150	7390	42
428	Oilpalm_Independent_smallholder	65	2	1	1	14	6	2	6	11760	3762	65
429	Oilpalm_Independent_smallholder	30	2	1	1	14	2	10	2	3600	2342	26.5
430	Oilpalm_Independent_smallholder	52	3	2	1	15	9	4	2	7366.5	2998	49.5
431	Oilpalm_Independent_smallholder	60	4	3	1	16	8	5	3	6300	4009	65
432	Oilpalm_Independent_smallholder	58	6	3	3	26	9	8	9	16200	7931	29
433	Oilpalm_Independent_smallholder	61	4	3	1	16	8	0	4	7200	5564	59.5
434	Oilpalm_Independent_smallholder	47	3	2	1	15	5	0	5	9200	4663	51
435	Oilpalm_Independent_smallholder	40	3	1	2	11	6	0	5	9000	4903	73
436	Oilpalm_Independent_smallholder	65	1	1	0	5	3.5	0	1.5	3320	2468.5	69
437	Oilpalm_Independent_smallholder	65	1	1	0	7	5.5	0	1.5	2940	2468.5	89
438	Oilpalm_Independent_smallholder	47	4	3	1	30	10	10	10	18000	6494	53
439	Oilpalm_Independent_smallholder	65	3	3	0	43	6	30	7	24700	5133	97
440	Oilpalm_Independent_smallholder	47	5	3	2	2	1	0	1	3900	3790	52.5
441	Oilpalm_Independent_smallholder	28	2	1	1	14	7	0	7	12600	4117	86
442	Oilpalm_Independent_smallholder	44	5	2	3	5.5	0	0	5.5	9900	6032.5	69.5
443	Oilpalm_Independent_smallholder	20	5	5	0	12	5	3	4	7200	4780	81.5
444	Oilpalm_Independent_smallholder	38	1	1	0	4	2	0	2	3600	1446	75.5
445	Oilpalm_Independent_smallholder	42	7	4	3	10	4	0	6	12000	8722	52.5
446	Oilpalm_Independent_smallholder	50	2	2	0	16	12	0	4	12000	5412	75.5
447	Oilpalm_Independent_smallholder	42	5	4	1	23	16	0	7	17600	7045	78
448	Oilpalm_Independent_smallholder	58	5	4	1	22	12	0	10	19230	8830	60.5
449	Oilpalm_Independent_smallholder	32	6	3	3	18	11	4	3	12300	8081	76.5
450	Oilpalm_Independent_smallholder	48	9	4	5	14	6	4	4	13220	10524	70
451	Oilpalm_Independent_smallholder	38	7	3	4	14	10	0	4	13450	8972	85.5
452	Oilpalm_Independent_smallholder	44	6	3	3	13	8	2	3	12500	6761	78
453	Oilpalm_Independent_smallholder	60	7	4	3	19	9	0	10	21530	8942	92
454	Oilpalm_Independent_smallholder	52	4	2	2	15	5	0	5	12250	5559	19
455	Oilpalm_Independent_smallholder	55	3	1	2	25	15	0	5	25240	4903	43
456	Oilpalm_Independent_smallholder	38	2	1	1	20	10	0	6	19360	4362	56.5
457	Oilpalm_Independent_smallholder	47	3	2	1	22	7	0	6	15800	5018	14
458	Oilpalm_Independent_smallholder	72	4	2	2	21	4	5	7	13422	5669	55.5
459	Oilpalm_Independent_smallholder	36	3	2	1	14	3	0	8	15422	5128	67.5
460	Oilpalm_Independent_smallholder	30	3	2	1	30	20	0	9	24800	6323	66.5
461	Oilpalm_Independent_smallholder	32	4	3	1	12	8	0	4	7300	4364	50.5
462	Oilpalm_Independent_smallholder	62	2	2	0	30	20	0	6	12600	4922	70
463	Oilpalm_Independent_smallholder	60	2	2	0	8	4	0	4	7200	4012	45
464	Oilpalm_Independent_smallholder	46	7	5	2	13	8	0	5	9000	7527	55
465	Oilpalm_Independent_smallholder	66	3	3	0	12	6	0	6	10800	5378	52.5
466	Oilpalm_Independent_smallholder	57	4	3	1	15	10	0	5	11400	4719	62
467	Oilpalm_Independent_smallholder	45	3	2	1	8	4	0	4	7400	3708	63.5
468	Oilpalm_Independent_smallholder	27	3	2	1	26	16	0	10	19700	5838	63.5
469	Oilpalm_Independent_smallholder	59	4	3	1	23	13	0	10	31350	6494	70.5
470	Oilpalm_Independent_smallholder	44	4	3	1	10	5	0	5	9451	4719	58.5
471	Oilpalm_Independent_smallholder	44	8	4	4	11	7	0	4	11600	8908	62
472	Oilpalm_Independent_smallholder	39	6	3	3	7	4	0	3	10100	7001	59
473	Oilpalm_Independent_smallholder	52	6	6	0	30	15	0	15	32320	9965	59
474	Oilpalm_Independent_smallholder	38	5	3	2	16	10	0	6	19970	6570	70
475	Oilpalm_Independent_smallholder	42	6	4	2	8	4	0	4	7200	6516	65
476	Oilpalm_Independent_smallholder	41	6	3	3	22	12	0	10	21270	8886	52
477	Oilpalm_Independent_smallholder	36	6	4	2	34	19	4	11	24860	9601	61.5
478	Oilpalm_Independent_smallholder	46	7	4	3	8	7	0	1	5800	5747	57
479	Oilpalm_Independent_smallholder	38	5	5	0	11	5	3	3	15440	6225	61
480	Oilpalm_Independent_smallholder	52	6	5	1	28	18	0	10	28560	9006	52
481	Oilpalm_Independent_smallholder	57	5	3	2	21	7	10	4	7200	6460	47
482	Oilpalm_Independent_smallholder	48	4	4	0	7	4	0	3	9585	4969	63.5
483	Oilpalm_Independent_smallholder	67	4	4	0	12	6	0	6	17730	5434	56.5
484	Oilpalm_Independent_smallholder	52	6	3	3	22	18	0	4	13010	6756	67
485	Oilpalm_Independent_smallholder	51	3	2	1	17	5	3	6	16200	5618	62
486	Oilpalm_Independent_smallholder	70	3	2	1	26	11	11	4	10760	3708	48
487	Oilpalm_Independent_smallholder	68	4	2	2	6	3	0	3	6000	4249	67.5
488	Oilpalm_Independent_smallholder	47	4	3	1	18	9	6	3	6800	4009	43.5
489	Oilpalm_Independent_smallholder	50	4	3	1	24	13	7	4	8100	4364	26
490	Oilpalm_Independent_smallholder	40	3	2	1	10	7	0	5	9360	4063	26
491	Oilpalm_Independent_smallholder	55	3	2	1	23	11	6	5	10250	4063	81
492	Oilpalm_Independent_smallholder	48	4	4	0	18	12	0	5	13400	5679	57
493	Oilpalm_Independent_smallholder	58	4	4	0	12	8	0	4	8510	4124	34
494	Oilpalm_Independent_smallholder	42	5	3	2	7	5	0	2	6300	4550	34
495	Oilpalm_Independent_smallholder	50	5	4	1	11	6	2	3	9570	5565	35
496	Oilpalm_Independent_smallholder	75	5	4	1	13	10	0	3	5850	5215	53
497	Oilpalm_Independent_smallholder	71	4	4	0	15	9	2	4	10800	4815	26
498	Oilpalm_Independent_smallholder	58	4	3	1	9	6	0	3	6200	4809	45
499	Oilpalm_Independent_smallholder	48	4	2	2	9		0	3	5400	4949	24.5
500	Oilpalm_Independent_smallholder	58	6	2	4	8		0	4	7200	6396	73
501	Oilpalm_Control	61	8	6	2	3	3	0		8400	6378	52.5
502	Oilpalm_Control	52	3	1	2	3	3	0		3430	3098	14
503	Oilpalm_Control	42	4	1	3	7	3	4		3540	3469	45
504	Oilpalm_Control	32	3	1	2	3	3	0		5001	3098	52.5
505	Oilpalm_Control	38	8	6	2	26	5	3		11820	8778	71
506	Oilpalm_Control	56	7	6	1	12	3	0		8094	8007	40
507	Oilpalm_Control	38	4	3	1	7	7	0		9190	4639	43
508	Oilpalm_Control	44	5	4	1	5	5	0		12920	5545	34
509	Oilpalm_Control	46	5	4	1	25	6	0		11644	8045	43
510	Oilpalm_Control	37	4	3	1	12	10	2		11820	8989	44.5
511	Oilpalm_Control	42	3	3	0	9	9	0		22100	6658	33.5
512	Oilpalm_Control	50	4	4	0	8	8	0		13130	5974	26.5
513	Oilpalm_Control	48	6	4	2	19	8	0		20212	8606	38.5
514	Oilpalm_Control	38	4	4	0	3	3	0		4600	3524	43.5
515	Oilpalm_Control	40	5	3	2	13	4	0		17400	6090	45
516	Oilpalm_Control	48	4	4	0	3	3	0		4940	3524	36
517	Oilpalm_Control	60	5	5	0	3	3	0		9909	4520	43
518	Oilpalm_Control	61	4	3	1	23	3	20		5699	4389	47
519	Oilpalm_Control	46	5	4	1	8	8	0		11400	6975	55.5
520	Oilpalm_Control	48	6	4	2	19	5	3		12084	6996	68
521	Oilpalm_Control	55	7	4	3	35	6	0		13780	6587	41.5
522	Oilpalm_Control	40	8	4	4	18	7	4		9344	8358	61.5
523	Oilpalm_Control	64	4	4	0	2	2	0		6010	3954	10
524	Oilpalm_Control	40	4	3	1	4	4	0		17980	4229	79
525	Oilpalm_Control	45	3	2	1	5	5	0		11360	3823	32.5
526	Oilpalm_Control	40	9	4	5	14	3	3		9840	7719	49
527	Oilpalm_Control	59	5	5	0	2	2	0		8610	5360	58
528	Oilpalm_Control	57	2	1	1	9	7	2		17000	4417	55.5
529	Oilpalm_Control	38	9	4	5	12	2	2		14880	8559	58.5
530	Oilpalm_Control	33	3	3	0	9	9	0		18740	5458	41.5
531	Oilpalm_Control	41	3	2	1	3	3	0		15760	4413	60.5
532	Oilpalm_Control	43	1	1	0	10	2	0		5002	1646	56
533	Oilpalm_Control	52	1	1	0	2	2	0		2000	1646	55
534	Oilpalm_Control	37	2	1	1	4	4	0		4000	2577	46
535	Oilpalm_Control	53	3	1	2	3	3	0		3320	2858	51.5
536	Oilpalm_Control	68	1	1	0	2	2	0		2060	1306	56
537	Oilpalm_Control	55	2	1	1	8	8	0		11650	4777	69
538	Oilpalm_Control	48	5	1	4	3	3	0		4410	4100	45
539	Oilpalm_Control	69	5	5	0	2	2	0		3200	2700	60
540	Oilpalm_Control	44	3	2	1	2	2	0		4400	2733	58
541	Oilpalm_Control	53	3	3	0	1	1	0		3900	2368	48
542	Oilpalm_Control	37	3	2	1	44	4	0		11265	4433	59
543	Oilpalm_Control	45	3	2	1	7	7	0		10660	5183	56
544	Oilpalm_Control	47	3	2	1	6	6	0		9612	4933	60
545	Oilpalm_Control	41	3	2	1	6	6	0		9612	4933	78
546	Oilpalm_Control	64	3	3	0	35	4	15		11205	3118	62.5
547	Oilpalm_Control	38	3	2	1	24	4	0		9525	3233	57
548	Oilpalm_Control	57	4	3	1	32	3	0		8005	3639	65
549	Oilpalm_Control	40	2	2	0	63	4	15		15206	2462	45
550	Oilpalm_Control	58	3	3	0	32	4	0		9805	3118	62
551	Oilpalm_Control	61	9	5	4	19	2	17		9820	7664	62.5
552	Oilpalm_Control	40	5	3	2	52	2	50		5560	4810	57.5
553	Oilpalm_Control	48	6	5	1	18	5	0		11510	9051	77.5
554	Oilpalm_Control	52	5	5	0	5	5	0		10600	6180	66.5
555	Oilpalm_Control	41	8	4	4	22	2	20		7336	7108	53.5
556	Oilpalm_Control	32	6	3	3	10	7	3		15844	6931	76
557	Oilpalm_Control	46	4	2	2	8	4	4		4000	3524	67.5
558	Oilpalm_Control	60	3	2	1	3	3	0		3120	2983	81
559	Oilpalm_Control	60	2	2	0	22	5	12		5240	3462	14
560	Oilpalm_Control	48	3	2	1	6	6	0		6000	4483	68
561	Oilpalm_Control	36	3	2	1	15	8	7		20687	5733	59.5
562	Oilpalm_Control	42	4	4	0	14	7	0		12682	6024	33.5
563	Oilpalm_Control	42	4	3	1	3	3	0		17480	5139	55
564	Oilpalm_Control	47	3	2	1	1.5	1.5	0		3310	2608	72.5
565	Oilpalm_Control	31	7	2	5	2	2	0		5800	5557	64.5
566	Oilpalm_Control	50	2	2	0	24	4	0		8660	3342	70
567	Oilpalm_Control	50	3	2	1	20	3	0		6520	3823	73
568	Oilpalm_Control	56	6	4	2	14	6	0		8236	6566	76
569	Oilpalm_Control	40	7	2	5	4	2	2		4036	3565	73
570	Oilpalm_Control	50	3	2	1	7	4	3		10000	3983	63
571	Oilpalm_Control	50	5	3	2	4	4	0		7555	5410	71.5
572	Oilpalm_Control	51	5	4	1	2	2	0		4900	4045	48
573	Oilpalm_Control	44	6	4	2	1	1	0		4600	3870	30
574	Oilpalm_Control	60	7	4	3	6	6	0		6400	5557	31
575	Oilpalm_Control	52	8	4	4	7	7	0		11200	7608	53
576	Oilpalm_Control	54	4	4	0	6	6	0		6000	4274	50.5
577	Oilpalm_Control	59	4	3	1	6	6	0		8400	4389	29
578	Oilpalm_Control	70	3	2	1	12	7	0		8600	3983	29.5
579	Oilpalm_Control	48	9	4	5	24	8	0		12800	8629	14.5
580	Oilpalm_Control	57	5	5	0	32	6	0		15000	4930	18
581	Oilpalm_Control	50	2	1	1	16	9	0		12100	3827	14.5
582	Oilpalm_Control	51	9	4	5	32	5	0		12600	7879	16.5
583	Oilpalm_Control	36	3	3	0	7	7	0		7000	3868	15.5
584	Oilpalm_Control	46	3	2	1	7	7	0		8800	3983	18.5
585	Oilpalm_Control	55	1	1	0	18	5	0		11600	2056	18.5
586	Oilpalm_Control	57	1	1	0	10	6	0		9000	2306	15
587	Oilpalm_Control	73	2	1	1	7	7	0		7000	3327	14.5
588	Oilpalm_Control	42	3	1	2	12	4	0		7800	3348	15
589	Oilpalm_Control	40	1	1	0	9	7	0		9000	2556	22
590	Oilpalm_Control	53	2	1	1	18	6	0		8000	3077	14.5
591	Oilpalm_Control	39	5	1	4	24	8	0		9000	5890	17.5
592	Oilpalm_Control	49	5	5	0	13	5.5	0		6000	4805	18.5
593	Oilpalm_Control	53	3	2	1	12	7	0		5500	3983	14
594	Oilpalm_Control	24	3	3	0	16	6	0		6000	3618	22.5
595	Oilpalm_Control	35	3	2	1	7	7	0		7000	3983	15
596	Oilpalm_Control	40	3	2	1	6	6	0		6000	3733	14
597	Oilpalm_Control	34	3	2	1	7	7	0		7000	3983	21.5
598	Oilpalm_Control	61	3	2	1	2	2	0		3480	2733	19.5
599	Oilpalm_Control	26	3	3	0	7	7	0		7000	3868	22
600	Oilpalm_Control	58	3	2	1	13	6	0		8000	3733	36
601	Jatropha_PermanentWorker	56	10	3	7	20	10	10		4550	4202	53.5
602	Jatropha_PermanentWorker	35	3	2	1	17	8	9		7010	662	45
603	Jatropha_PermanentWorker	45	5	3	2	13	5	8		7840	2137	83
604	Jatropha_PermanentWorker	21	2	2	0	12	3	9		4400	1507	66
605	Jatropha_PermanentWorker	37	6	2	4	9	2	7		8540	3987	72
606	Jatropha_PermanentWorker	38	2	2	0	8	2	6		5160	1457	66
607	Jatropha_PermanentWorker	32	5	3	2	10	2	8		4760	2737	62
608	Jatropha_PermanentWorker	60	8	4	4	11	2	9		4300	3325	69.5
609	Jatropha_PermanentWorker	27	9	5	4	9	4	5		7540	5277	67
610	Jatropha_PermanentWorker	28	8	4	4	11	3	8		6296	2895	60.5
611	Jatropha_PermanentWorker	30	1	1	0	13	3	10		5740	998	66.5
612	Jatropha_PermanentWorker	24	4	3	1	17	4	13		4490	3284	70.5
613	Jatropha_PermanentWorker	25	12	6	6	26	4	22		3288	2637	43
614	Jatropha_PermanentWorker	32	7	5	2	19	16	3		8260	2161	64.5
615	Jatropha_PermanentWorker	52	7	4	3	16	4	12		4860	2562	50.5
616	Jatropha_PermanentWorker	35	8	2	6	10	6	4		5840	2743	47.5
617	Jatropha_PermanentWorker	45	8	4	4	6	4	2		8965	2795	46.5
618	Jatropha_PermanentWorker	35	5	2	3	5	1	4		7340	3494	77.5
619	Jatropha_PermanentWorker	40	4	2	2	10	5	5		7020	3101	72.5
620	Jatropha_PermanentWorker	28	3	2	1	16	10	6		3700	1126	57
621	Jatropha_PermanentWorker	30	4	2	2	11	4	7		4200	3101	54.5
622	Jatropha_PermanentWorker	26	4	2	2	8	3	5		2992	1901	54
623	Jatropha_PermanentWorker	35	4	2	2	11	2	9		6290	3145	58
624	Jatropha_PermanentWorker	58	5	2	3	12	4	8		6110	2134	55
625	Jatropha_PermanentWorker	25	4	3	1	10	5	5		6150	2604	75.5
626	Jatropha_PermanentWorker	35	6	4	2	10	3	7		2150	1729	53.5
627	Jatropha_PermanentWorker	45	5	2	3	9	4	5		3635	1731	53
628	Jatropha_PermanentWorker	50	4	2	2	12	5	7		3210	1391	52.5
629	Jatropha_PermanentWorker	30	5	2	3	9	4	5		4700	3378	64.5
630	Jatropha_PermanentWorker	41	7	2	5	3	3			4550	2800	79.5
631	Jatropha_PermanentWorker	20	2	1	1	8	3	5		3710	2720	73.5
632	Jatropha_PermanentWorker	40	4	2	2	7	3	4		7960	3701	71
633	Jatropha_PermanentWorker	27	4	2	2	11	3	8		3765	1641	70
634	Jatropha_PermanentWorker	30	5	2	3	9	3	6		3950	3378	64.5
635	Jatropha_PermanentWorker	42	4	3	1	10	2	8		5320	2438	40.5
636	Jatropha_PermanentWorker	27	2	2	0	13	5	8		14280	5601	83
637	Jatropha_PermanentWorker	31	6	3	3	10	3	7		4840	4170	56.5
638	Jatropha_PermanentWorker	45	2	1	1	10	2	8		4030	522	54
639	Jatropha_PermanentWorker	35	6	2	4	13	5	8		4100	1971	45.5
640	Jatropha_PermanentWorker	24	3	2	1	11	3	8		4370	2388	62
641	Jatropha_PermanentWorker	52	6	2	4	7	1	6		4580	4411	60
642	Jatropha_PermanentWorker	25	2	1	1	7	1	6		3990	1577	60
643	Jatropha_PermanentWorker	33	4	2	2	7	2	5		4430	3745	55.5
644	Jatropha_PermanentWorker	27	2	1	1	10	3	7		5700	1542	73.5
645	Jatropha_PermanentWorker	30	5	2	3	11	3	8		4720	3978	74
646	Jatropha_PermanentWorker	32	5	2	3	13	4	9		6660	3678	55
647	Jatropha_PermanentWorker	55	7	3	4	14	5	9		6300	3793	64
648	Jatropha_PermanentWorker	56	12	3	9	9	5	4		5250	4752	61
649	Jatropha_PermanentWorker	56	4	2	2	15	4	11		2070	1545	50
650	Jatropha_PermanentWorker	29	6	2	4	1	0	1		3550	3331	80.5
651	Jatropha_PermanentWorker	40	3	1	2	2	0	2		7500	1753	90.5
652	Jatropha_PermanentWorker	40	10	4	6	3	0	3		4500	3616	60.5
653	Jatropha_PermanentWorker	43	8	3	5	4	0	4		5300	3974	60
654	Jatropha_PermanentWorker	37	5	2	3	8	3	5		4360	2678	72
655	Jatropha_PermanentWorker	55	3	1	2	6	0	6		3520	2353	63
656	Jatropha_PermanentWorker	48	8	2	6	10	3	7		6720	3717	60.5
657	Jatropha_PermanentWorker	36	6	3	3	12	4	8		7390	5990	48
658	Jatropha_PermanentWorker	23	3	2	1	7	3	4		3862	1712	57.5
659	Jatropha_PermanentWorker	29	3	2	1	6	3	3		3660	2208	49.5
660	Jatropha_PermanentWorker	30	5	2	3	12	1	11		3220	1534	51.5
661	Jatropha_PermanentWorker	35	3	2	1	10		10		3720	3554	54.5
662	Jatropha_PermanentWorker	29	5	2	3	4	2	2		5100	2134	51
663	Jatropha_PermanentWorker	31	5	2	3	7	5	2		3840	2268	51.5
664	Jatropha_PermanentWorker	47	3	2	1	4	1	3		4300	1668	47
665	Jatropha_PermanentWorker	29	5	2	3	7	3	4		5700	2134	49.5
666	Jatropha_PermanentWorker	39	5	2	3	6	3	3		3220	1369	36.5
667	Jatropha_PermanentWorker	40	7	2	5	7	3	4		4410	3900	49
668	Jatropha_PermanentWorker	28	4	3	1	9	4	5		3590	944	38
669	Jatropha_PermanentWorker	32	9	3	6	7	4	3		6180	2229	38.5
670	Jatropha_PermanentWorker	19	8	2	6	10	4	6		4880	2205	65.5
671	Jatropha_PermanentWorker	34	7	2	5	8	4	4		3420	2044	65.5
672	Jatropha_PermanentWorker	36	7	2	5	7	4	3		6790	4204	71
673	Jatropha_PermanentWorker	19	3	2	1	8	4	4		3500	1146	35
674	Jatropha_PermanentWorker	66	3	3	0	10	5	5		5520	4421	71
675	Jatropha_PermanentWorker	21	10	4	6	6	3	3		4360	3711	61
676	Jatropha_PermanentWorker	19	10	5	5	2		2		3693	2800	67.5
677	Jatropha_PermanentWorker	20	15	4	11	9	4	5		7540	6126	68.5
678	Jatropha_PermanentWorker	17	7	3	4	15	9	6		6228	4103	68
679	Jatropha_PermanentWorker	35	9	2	7	7	3	4		6900	2150	51
680	Jatropha_PermanentWorker	36	7	2	5	6	3	3		2640	1640	53.5
681	Jatropha_PermanentWorker	25	6	3	3	6	1	5		3100	1276	50.5
682	Jatropha_PermanentWorker	50	10	2	8	9	3	6		4100	2409	53
683	Jatropha_PermanentWorker	60	7	3	4	9	2	7		4300	3284	83
684	Jatropha_PermanentWorker	34	6	2	4	9	1	8		3240	3011	63.5
685	Jatropha_PermanentWorker	38	5	3	2	10	1	9		7360	1897	67
686	Jatropha_PermanentWorker	42	3	2	1	9	1	8		3510	3166	57.5
687	Jatropha_PermanentWorker	24	6	2	4	1	1	0		5010	4811	64.5
688	Jatropha_PermanentWorker	32	9	2	7	4	4	0		4500	2480	37.5
689	Jatropha_PermanentWorker	28	2	2	0	1	1	0		3600	1561	50.5
690	Jatropha_PermanentWorker	52	6	2	4	9	3	6		4650	3647	38
691	Jatropha_PermanentWorker	20	22	10	12	11	2	9		5160	4693	39
692	Jatropha_PermanentWorker	25	5	2	3	6	2	4		4260	2538	47.5
693	Jatropha_PermanentWorker	52	8	3	5	10	7	3		7040	2494	49.5
694	Jatropha_PermanentWorker	31	9	4	5	9	9	0		6900	3672	42.5
695	Jatropha_PermanentWorker	47	5	2	3	3	2	1		5600	2443	15
696	Jatropha_PermanentWorker	45	4	2	2	9	3	6		4900	2205	14
697	Jatropha_PermanentWorker	37	5	2	3	6	3	3		4700	2399	21.5
698	Jatropha_PermanentWorker	31	5	2	3	6	3	3		4500	2464	19.5
699	Jatropha_PermanentWorker	30	5	2	3	8	3	5		4190	2399	22
700	Jatropha_PermanentWorker	31	5	2	3	6	2	4		5040	2494	36
701	Jatropha_SeasonalWorker	20	1	1	0	26	20	6		7010	2826	58
702	Jatropha_SeasonalWorker	26	12	4	8	15	10	5		9890	8316	54
703	Jatropha_SeasonalWorker	31	5	3	2	9	5	4		4200	2361	56.5
704	Jatropha_SeasonalWorker	75	15	8	7	13	10	3		7080	5926	51
705	Jatropha_SeasonalWorker	20	8	2	6	8	5	3		6290	2168	61
706	Jatropha_SeasonalWorker	35	6	2	4	5	4	1		5340	4302	67.5
707	Jatropha_SeasonalWorker	25	6	2	4	7	5	2		2748	2258	29
708	Jatropha_SeasonalWorker	41	8	2	6	16	15	1		9540	5724	60.5
709	Jatropha_SeasonalWorker	32	2	2	0	7	6	1		6783	3848	64
710	Jatropha_SeasonalWorker	25	6	2	4	2	1	1		4926	3838	26
711	Jatropha_SeasonalWorker	24	4	2	2	7	7			7538	3792	84.5
712	Jatropha_SeasonalWorker	45	2	1	1	11	8	3		4240	1546	50.5
713	Jatropha_SeasonalWorker	50	4	2	2	4	3	1		2990	1901	56
714	Jatropha_SeasonalWorker	42	5	2	3	5	5			4090	1534	61.5
715	Jatropha_SeasonalWorker	45	4	2	2	8	5	3		5660	1901	52
716	Jatropha_SeasonalWorker	51	2	1	1	8	6	2		6140	3720	61.5
717	Jatropha_SeasonalWorker	35	3	1	2	8	7	1		3460	1153	52.5
718	Jatropha_SeasonalWorker	29	7	2	5	3	3			3130	2044	48
719	Jatropha_SeasonalWorker	45	10	4	6	5	2	3		2754	2621	19.5
720	Jatropha_SeasonalWorker	22	1	1	0	5	4	1		3810	2148	59
721	Jatropha_SeasonalWorker	21	4	1	3	3	3			5850	2586	61.5
722	Jatropha_SeasonalWorker	24	3	1	2	4	3	1		1900	793	83
723	Jatropha_SeasonalWorker	21	8	5	3	6	3	3		4350	2802	58.5
724	Jatropha_SeasonalWorker	25	13	4	9	8	8			6100	4060	44.5
725	Jatropha_SeasonalWorker	21	8	3	5	3	3			2840	2333	40.5
726	Jatropha_SeasonalWorker	20	6	3	3	4	2	2		3640	2370	36
727	Jatropha_SeasonalWorker	42	7	3	4	3	3			2403	1548	30.5
728	Jatropha_SeasonalWorker	24	5	2	3	3	2	1		3540	3378	53.5
729	Jatropha_SeasonalWorker	25	3	2	1	6	2	4		3500	1112	54.5
730	Jatropha_SeasonalWorker	30	6	2	4	1	1			2900	1811	61
731	Jatropha_SeasonalWorker	26	3	2	1	3		3		2940	1712	49.5
732	Jatropha_SeasonalWorker	46	4	3	1	3	2	1		2940	1838	56
733	Jatropha_SeasonalWorker	34	5	3	2	3	3			3540	1905	15.5
734	Jatropha_SeasonalWorker	52	3	3	0	2	2			3540	1482	18.5
735	Jatropha_SeasonalWorker	29	6	2	4	4	3	1		3240	2258	18.5
736	Jatropha_SeasonalWorker	31	4	2	2	8	4	4		1940	1792	15
737	Jatropha_SeasonalWorker	35	5	2	3	7	5	2		3340	2025	14.5
738	Jatropha_SeasonalWorker	41	4	2	2	3	3			3200	1792	15
739	Jatropha_SeasonalWorker	39	7	2	5	6	5	1		3110	2491	22
740	Jatropha_SeasonalWorker	32	8	2	6	6	6			2740	2724	14.5
741	Jatropha_SeasonalWorker	41	6	2	4	4	4			5740	2258	17.5
742	Jatropha_SeasonalWorker	39	7	2	5	8	7	1		3540	2491	18.5
743	Jatropha_SeasonalWorker	29	5	2	3	3	3			3540	2025	14
744	Jatropha_SeasonalWorker	31	6	2	4	5	5			3640	2258	22.5
745	Jatropha_SeasonalWorker	32	4	2	2	6	6			3440	1792	15
746	Jatropha_SeasonalWorker	38	6	2	4	10	7	3		4640	2258	14
747	Jatropha_SeasonalWorker	32	7	2	5	7	5	2		2940	2600	21.5
748	Jatropha_SeasonalWorker	34	8	2	6	4	4			3040	2833	19.5
749	Jatropha_SeasonalWorker	45	9	2	7	3	3			3440	3110	22
750	Jatropha_SeasonalWorker	33	9	2	7	8	6	2		4640	3110	36
751	Jatropha_Control	28	7	2	5	5	5			3901	3144	49
752	Jatropha_Control	55	7	2	5	7	6	1		3100	2694	58
753	Jatropha_Control	65	8	1	7	5	4	1		4520	3618	59
754	Jatropha_Control	60	1	1	0	42	40	2		7281	1902	57.5
755	Jatropha_Control	57	12	4	8	12	9	3		9000	3627	59
756	Jatropha_Control	50	8	2	6	13	12	1		5050	3877	76.5
757	Jatropha_Control	40	15	3	12	10	8	2		5320	5032	63
758	Jatropha_Control	75	7	1	6	9	6	3		10450	4905	48
759	Jatropha_Control	30	2	2	0	4	2	2		3720	2201	27.5
760	Jatropha_Control	34	10	2	8	6	5	1		6910	5153	107
761	Jatropha_Control	32	8	1	7	7	5	2		5780	4118	69.5
762	Jatropha_Control	65	6	2	4	7	4	3		4550	3661	69
763	Jatropha_Control	36	10	3	7	5	3	2		4640	4302	66
764	Jatropha_Control	70	6	1	5	7	4	3		4340	3732	62
765	Jatropha_Control	40	2	1	1	4	3	1		7900	4142	82
766	Jatropha_Control	34	6	3	3	8	8	0		5100	3236	49.5
767	Jatropha_Control	36	7	2	5	4	4	0		2960	2501	44.5
768	Jatropha_Control	25	4	2	2	16	16	0		13060	1799	46.5
769	Jatropha_Control	50	6	2	4	7	4	3		4150	1407	51
770	Jatropha_Control	25	5	2	3	3	1	2		3530	2763	63.5
771	Jatropha_Control	28	4	2	2	15	15			3200	2195	51.5
772	Jatropha_Control	30	2	1	1	9	9			4300	942	50.5
773	Jatropha_Control	48	14	3	11	9	9			9100	4584	69
774	Jatropha_Control	42	5	2	3	9	9			4790	4458	67
775	Jatropha_Control	22	5	2	3	6	6			3640	2778	62
776	Jatropha_Control	33	5	2	3	5	5			4150	3338	58
777	Jatropha_Control	42	5	2	3	9	9			6751	4183	56.5
778	Jatropha_Control	35	9	2	7	4	4			3110	2569	54
779	Jatropha_Control	65	6	2	4	4	3	1		3100	3077	65.5
780	Jatropha_Control	45	7	3	4	2	2			4500	3830	69
781	Jatropha_Control	51	6	2	4	6	6			4300	3047	69
782	Jatropha_Control	43	2	1	1	6	6			6001	3982	65
783	Jatropha_Control	35	6	2	4	5	5			3700	1811	28
784	Jatropha_Control	35	10	3	7	2	2			3160	2612	63
785	Jatropha_Control	37	11	5	6	1	1			4300	3824	58
786	Jatropha_Control	60	8	3	5	2	2			4800	4564	79.5
787	Jatropha_Control	36	7	3	4	3	3			4450	4303	84.5
788	Jatropha_Control	45	10	4	6	4	4			4450	4251	72
789	Jatropha_Control	40	6	3	3	4	3	1		4247	3370	84
790	Jatropha_Control	57	7	2	5	2	2	0		3550	3444	50
791	Jatropha_Control	51	3	2	1	14	9	5		10000	7112	49.5
792	Jatropha_Control	25	10	3	7	11	11			5000	3862	76.5
793	Jatropha_Control	21	10	4	6	6	2	4		4650	4191	55.5
794	Jatropha_Control	64	5	3	2	16	13	3		11820	10477	72
795	Jatropha_Control	28	8	3	5	7	6	1		9700	9204	66
796	Jatropha_Control	40	8	2	6	9	8	1		9900	9237	55.5
797	Jatropha_Control	45	7	2	5	9	7	2		8640	7900	55.5
798	Jatropha_Control	60	2	2	0	9	6	3		9720	9057	66
799	Jatropha_Control	38	3	2	1	3	2	1		3600	3128	55
800	Jatropha_Control	24	7	2	5	4	2	2		4000	3900	74
801	Jatropha_Control	32	4	2	2	9	6	3		8600	7701	55.5
802	Jatropha_Control	30	7	2	5	12	10	2		7400	5000	60.5
803	Jatropha_Control	59	5	3	2	3	2	1		4440	3771	57
804	Jatropha_Control	70	9	2	7	6	4	2		4300	3966	67
805	Jatropha_Control	45	5	3	2	11	10	1		15240	13171	52.5
806	Jatropha_Control	30	4	2	2	9	8	1		4350	4011	60
807	Jatropha_Control	31	5	2	3	10	8	2		6500	5144	64
808	Jatropha_Control	29	4	2	2	13	10	3		4400	3101	71.5
809	Jatropha_Control	30	5	3	2	4	2	2		2300	1591	60.5
810	Jatropha_Control	32	4	2	2	3	2	1		2200	1401	54
811	Jatropha_Control	35	5	2	3	5	2	3		6050	1784	47.5
812	Jatropha_Control	48	5	2	3	6	4	2		3850	2888	66
813	Jatropha_Control	30	4	2	2	8	7	1		3410	1275	57
814	Jatropha_Control	32	6	2	4	3	3			3200	2231	48
815	Jatropha_Control	28	8	3	5	16	16			3250	3006	52
816	Jatropha_Control	40	9	3	6	7	7			6020	4569	48.5
817	Jatropha_Control	53	10	4	6	4	4			3250	2931	48.5
818	Jatropha_Control	67	5	2	3	6	6			3250	2878	47
819	Jatropha_Control	27	7	2	5	2	2			3250	1834	54.5
820	Jatropha_Control	43	4	2	2	5	5			4250	1333	44
821	Jatropha_Control	30	7	2	5	3	3			4450	4044	57
822	Jatropha_Control	51	4	2	2	8	6	2		4350	2605	35.5
823	Jatropha_Control	32	6	2	4	10	10			6550	4411	59.5
824	Jatropha_Control	32	4	2	2	3	3			3450	1305	50
825	Jatropha_Control	58	9	5	4	4	4			5500	4636	62.5
826	Jatropha_Control	27	7	4	3	18	15	3		8250	2092	55
827	Jatropha_Control	39	7	3	4	8	8			8350	1453	46.5
828	Jatropha_Control	42	4	2	2	58	58			8250	3445	55.5
829	Jatropha_Control	28	5	2	3	11	11			8250	3878	61
830	Jatropha_Control	54	10	4	6	4	4			8250	5571	52
831	Jatropha_Control	70	7	4	3	6	6			8610	3962	56.5
832	Jatropha_Control	22	5	2	3	12	12			6005	3138	56.5
833	Jatropha_Control	40	6	2	4	8	5	3		5750	2881	74.5
834	Jatropha_Control	49	4	3	1	20	20			5500	4804	66
835	Jatropha_Control	56	2	2	0	12	12			4450	2701	54
836	Jatropha_Control	55	6	2	4	4	4			7500	3971	61
837	Jatropha_Control	42	3	3	0	5	5			4500	2571	61
838	Jatropha_Control	34	3	3	0	7	5	2		4100	3431	72.5
839	Jatropha_Control	25	2	2	0	5	5			3180	2101	70
840	Jatropha_Control	59	5	0	5	8	8			6600	3665	71
841	Jatropha_Control	30	9	2	7	7	5	2		4600	4499	72.5
842	Jatropha_Control	60	2	2	0	18	18			20100	1101	61
843	Jatropha_Control	31	9	5	4	5	5			4580	3466	70.5
844	Jatropha_Control	36	7	3	4	8	8			10200	5830	69
845	Jatropha_Control	90	7	3	4	15	12	3		3600	2680	47
846	Jatropha_Control	30	9	3	6	14	12	2		4500	2199	47.5
847	Jatropha_Control	31	15	7	8	19	18	1		10800	7918	85.5
848	Jatropha_Control	42	5	2	3	36	36			14100	1978	50.5
849	Jatropha_Control	40	4	2	2	14	14			8600	2045	46.5
850	Jatropha_Control	28	7	3	4	6	6			6400	4803	45.5
										8404.52

## Sheet: Food Consumption Score
ID	Observation	Meals	G1	G2	G3	G4	G5	G6	G7	G8	G9	G10	G11	G12	G13	G14		Staple	Pulses	Vegetable	Fruit	Meat and Fish	Milk	Oil	Sugar	Total
1	Sugarcane_grower	2	7	7	5	7	0	7	5	6	7	2	0	0	0	0		7	0	0	0	7	0	7	0	45.5
2	Sugarcane_grower	3	7	7	1	1	1	7	1	7	2	0	0	2	3	0		7	1	2	3	7	0	2	0	51
3	Sugarcane_grower	3	7	7	5	7	6	7	0	5	7	4	4	5	6	5		7	6	5	6	7	4	7	5	93
4	Sugarcane_grower	3	7	3	7	7	0	7	0	0	0	0	0	7	0	0		7	0	7	0	7	0	0	0	49
5	Sugarcane_grower	3	7	5	0	7	0	7	0	5	0	0	0	7	0	5		7	0	7	0	7	0	0	5	51.5
6	Sugarcane_grower	3	7	5	7	7	4	7	3	3	7	3	4	3	2	7		7	4	3	2	7	4	7	7	82
7	Sugarcane_grower	3	7	5	4	7	5	7	1	3	7	3	3	7	2	6		7	5	7	2	7	3	7	6	84.5
8	Sugarcane_grower	3	6	5	2	5	2	6	1	1	3	1	0	5	3	5		7	2	5	3	7	0	3	5	60
9	Sugarcane_grower	3	5	4	3	2	1	7	3	2	5	2	3	5	2	3		7	1	5	2	7	3	5	3	68
10	Sugarcane_grower	3	7	7	0	7	0	7	0	3	7	0	0	7	0	0		7	0	7	0	7	0	7	0	52.5
11	Sugarcane_grower	3	7	3	1	7	1	7	0	0	4	0	3	5	4	7		7	1	5	4	7	3	4	7	71.5
12	Sugarcane_grower	3	7		6	7	5	7	0	0	0	1	0	0	1	0		7	5	0	1	7	0	0	0	58
13	Sugarcane_grower	3	7	7	5	7	5	0	0	0	2	2	2	0	0	0		7	5	0	0	2	2	2	0	46
14	Sugarcane_grower	3	7	6	5	7	3	7	0	0	0	0	0	0	0	0		7	3	0	0	7	0	0	0	51
15	Sugarcane_grower	2	6	5	4	0	2	0	1	0	0	0	0	0	0	0		7	2	0	0	1	0	0	0	24
16	Sugarcane_grower	3	7	6	3	4	1	6	1	1	5	3	2	0	0	0		7	1	0	0	7	2	5	0	55.5
17	Sugarcane_grower	3	7	7	4	7	5	7	4	4	7	0	2	2	2	0		7	5	2	2	7	2	7	0	72.5
18	Sugarcane_grower	3	7	4	5	7	0	0	0	2	2	2	0	0	2	2		7	0	0	2	4	0	2	2	34
19	Sugarcane_grower	3	7	3	7	0	7	0	6	5	4	0	0	0	0	0		7	7	0	0	7	0	4	0	65
20	Sugarcane_grower	7	2	2	2	2	2	2	2	0	2	0	0	2	0	2		7	2	2	0	4	0	2	2	40
21	Sugarcane_grower	3	7	4	2	0	7	3	0	1	0	7	1	0	0	0		7	7	0	0	7	1	0	0	67
22	Sugarcane_grower	1	4	0	3	1	0	0	0	0	0	0	0	0	1	1		7	0	0	1	0	0	0	1	15.5
23	Sugarcane_grower	2	7	4	0	7	0	2	0	2	6	0	4	0	0	0		7	0	0	0	4	4	6	0	49
24	Sugarcane_grower	3	7	2	0	0	0	7	0	0	0	1	0	0	0	3		7	0	0	0	7	0	0	3	43.5
25	Sugarcane_grower	2		0	0	0	0	1	0	0	0	0	0	0	0	0		0	0	0	0	1	0	0	0	4
26	Sugarcane_grower	3	7	5	5	7	5	7	3	3	5	2	3	4	4	7		7	5	4	4	7	3	5	7	83
27	Sugarcane_grower	3	7	5	3	7	5	7	4	7	0	0	0	0	0	0		7	5	0	0	7	0	0	0	57
28	Sugarcane_grower	3	7	5	3	3	2	6	1		1	2	2	0	0	0		7	2	0	0	7	2	1	0	56.5
29	Sugarcane_grower	3	6	7	3	5	1	6	1	1	5	1	1	3	5	0		7	1	3	5	7	1	5	0	59.5
30	Sugarcane_grower	3	5	5	0	5	1	6	0	1	2	2	1	4	1	3		7	1	4	1	7	1	2	3	56.5
31	Sugarcane_grower	3	7	7	5	0	5	7	0	5	0	4	0	7	7	0		7	5	7	7	7	0	0	0	71
32	Sugarcane_grower	3	7	7	5	7	0	5	5	0	7	3	0	7	7	0		7	0	7	7	7	0	7	0	59.5
33	Sugarcane_grower	3	7	2	2	7	0	1	1	7	0	0	0	0	0	0		7	0	0	0	7	0	0	0	42
34	Sugarcane_grower	3	7	5	4	3	2	7	2	2	0	0	0	0	0	0		7	2	0	0	7	0	0	0	48
35	Sugarcane_grower	3	7	5	4	3	2	7	2	0	4	0	0	0	0	0		7	2	0	0	7	0	4	0	50
36	Sugarcane_grower	3	2	0	5	0	1	0	3	1	0	0	0	0	0	0		7	1	0	0	4	0	0	0	33
37	Sugarcane_grower	3	7	2	1	2	1	7	0	0	7	0	0	0	1	2		7	1	0	1	7	0	7	2	50.5
38	Sugarcane_grower	3	7	2	2	1	2	1	2	1	2	0	0	7	1	7		7	2	7	1	4	0	2	7	48.5
39	Sugarcane_grower	3	7	6	5	5	2	6	1	4	4	3	2	5	5	5		7	2	5	5	7	2	4	5	70.5
40	Sugarcane_grower	3	7	5	6	7	3	7	5	5	7	1	4	5	2	7		7	3	5	2	7	4	7	7	81
41	Sugarcane_grower	3	7	2		4	0	0	0	0	0	0	0	0	3	2		7	0	0	3	0	0	0	2	18
42	Sugarcane_grower	3	7	5	4	3	1	7	2	2	3	4	4	3	0	0		7	1	3	0	7	4	3	0	65.5
43	Sugarcane_grower	3	5	6	3	3	1	6	1	1	3	3	1	6	4	5		7	1	6	4	7	1	3	5	63
44	Sugarcane_grower	3	7	4	3	4	2	6	1	0	3	2	2	5	2	2		7	2	5	2	7	2	3	2	65.5
45	Sugarcane_grower	3	7	7	7	7	6	7	5	4	7	2	3	7	4	5		7	6	7	4	7	3	7	5	89
46	Sugarcane_grower	3	7	4	3	7	3	7	5	5	6	4	3	7	2	6		7	3	7	2	7	3	6	6	78
47	Sugarcane_grower	3	7		3	7	4	7	3	4	3	2	3	7	4	3		7	4	7	4	7	3	3	3	80
48	Sugarcane_grower	3	7	7	6	7	7	7		6	1	1	0	4	7	7		7	7	4	7	7	0	1	7	78
49	Sugarcane_grower	3	7	5	5	7	6	7	4	4	7	3	4	7	6	4		7	6	7	6	7	4	7	4	94.5
50	Sugarcane_grower	3	7	4	2	7	4	7	3	3	7	2	3	4	3	7		7	4	4	3	7	3	7	7	80
51	Sugarcane_grower	3	7	6	6	7	6	4	3	7	2	6	3	4	7	0		7	6	4	7	7	3	2	0	84
52	Sugarcane_grower	3	7	2	3	7	3	7	2	3	7	2	3	7	6	6		7	3	7	6	7	3	7	6	82.5
53	Sugarcane_grower	3	6	3	1	3	1	4	2	2	4	1	2	5	2	5		7	1	5	2	7	2	4	5	64.5
54	Sugarcane_grower	3	7	3	1	2	0	7	0	0	0	0	0	0	0	7		7	0	0	0	7	0	0	7	45.5
55	Sugarcane_grower	3	7	0	0	0	0	7	0	0	0	0	0	0	0	0		7	0	0	0	7	0	0	0	42
56	Sugarcane_grower	3	1	2	0	3	1	7	4	2	7	1	0	1	1	2		6	1	1	1	7	0	7	2	49.5
57	Sugarcane_grower	3	1	2	0	0	0	7	1	0	0	1	0	0	0	3		3	0	0	0	7	0	0	3	35.5
58	Sugarcane_grower	3	1	2	2	1	2	1	1	3	2	1	2	3	2	4		6	2	3	2	6	2	2	4	58
59	Sugarcane_grower	3	2	2	2	2	2	2	2	2	2	2	2	2	2	2		7	2	2	2	7	2	2	2	62
60	Sugarcane_grower	3	7	4	4	7	4	7	3	3	7	2	2	3	2	7		7	4	3	2	7	2	7	7	74
61	Sugarcane_grower	3	7	3	4	7	5	7	1	3	7	5	2	7	5	2		7	5	7	5	7	2	7	2	81.5
62	Sugarcane_grower	3	7	5	6	7	5	7	2	5	7	3	4	7	7	7		7	5	7	7	7	4	7	7	94
63	Sugarcane_grower	3	7	0	0	7	0	7	0	0	3	0	0	7	0	0		7	0	7	0	7	0	3	0	50.5
64	Sugarcane_grower	3	7	0	0	7	0	7	0	0	0	0	0	7	0	0		7	0	7	0	7	0	0	0	49
65	Sugarcane_grower	2	6	4	2	5	1	7	1	3	3	2	1	4	4	3		7	1	4	4	7	1	3	3	60
66	Sugarcane_grower	3	7	6	4	3	1	7	2	0	3	1	1	5	2	4		7	1	5	2	7	1	3	4	59.5
67	Sugarcane_grower	3	7	6	5	4	2	7	3	1	4	3	1	4	3	5		7	2	4	3	7	1	4	5	63.5
68	Sugarcane_grower	3	7	7	0	0	7	0	0	7	3	0	4	0	4	7		7	7	0	4	7	4	3	7	88
69	Sugarcane_grower	3	7	3	0	5	0	7	0	0	0	0	0	0	2	4		7	0	0	2	7	0	0	4	46
70	Sugarcane_grower	3	7	0	0	2	0	3	0	0	7	0	0	1	1	2		7	0	1	1	3	0	7	2	32.5
71	Sugarcane_grower	3	1	2	2	7	2	7	2	2	4	4	3	7	4	7		7	2	7	4	7	3	4	7	76.5
72	Sugarcane_grower	3	7	3	0	2	2	7	0	3	7	0	0	0	1	3		7	2	0	1	7	0	7	3	54
73	Sugarcane_grower	3	7	2	0	3	1	3	0	0	0	0	0	0	1	2		7	1	0	1	3	0	0	2	31
74	Sugarcane_grower	3	7	5	7	7	6	7	5	6	7	5	4	7	4	7		7	6	7	4	7	4	7	7	94
75	Sugarcane_grower	3	7	6	4	5	3	7	0	0	3	0	0	5	3	4		7	3	5	3	7	0	3	4	62.5
76	Sugarcane_grower	3	7	4	0	3	2	3	0	0	3	0	0	2	1	3		7	2	2	1	3	0	3	3	38
77	Sugarcane_grower	3	7	4	5	7	5	7	3	3	7	2	5	3	2	7		7	5	3	2	7	5	7	7	89
78	Sugarcane_grower	3	7	0	0	2	0	3	0	0	7	0	0	0	2	4		7	0	0	2	3	0	7	4	33.5
79	Sugarcane_grower	3	7	5	3	2	7	1	2	4	2	1	6	3	5	2		7	7	3	5	7	6	2	2	97
80	Sugarcane_grower	7	1	2	2	2	2	2	2	1	2	2	2	1	2	2		7	2	1	2	7	2	2	2	61
81	Sugarcane_grower	2	7	7	6	7	6	7	5	7	5	5	7	7	5	0		7	6	7	5	7	7	5	0	102.5
82	Sugarcane_grower	3	7	6	6	4	2	7	3	1	4	3	4	6	4	4		7	2	6	4	7	4	4	4	78
83	Sugarcane_grower	3	7	6	5	7	5	7	3	2	7	1	2	2	2	2		7	5	2	2	7	2	7	2	73.5
84	Sugarcane_grower	3	7	1	2	7	3	7	2	2	3	2	1	4	7	5		7	3	4	7	7	1	3	5	70
85	Sugarcane_grower	2	7	0	1	7	0	7	0	0	7	0	1	0	0	0		7	0	0	0	7	1	7	0	49.5
86	Sugarcane_grower	3	7	3	2	7	0	7	0	2	6	0	1	5	1	0		7	0	5	1	7	1	6	0	55
87	Sugarcane_grower	3	7	0	1	7	0	7	0	1	2	0	0	7	2	7		7	0	7	2	7	0	2	7	55.5
88	Sugarcane_grower	2	7	2	0	7	0	7	0	1	7	0	0	7	1	0		7	0	7	1	7	0	7	0	53.5
89	Sugarcane_grower	3	7	7	7	5	5	7	5	5	7	4	4	7	7	5		7	5	7	7	7	4	7	5	93
90	Sugarcane_grower	3	7	3	4	7	2	7	3	2	7	3	4	7	7	7		7	2	7	7	7	4	7	7	85
91	Sugarcane_grower	3	7	7	5	2	2	1	1	2	1	2	2	2	3	3		7	2	2	3	6	2	1	3	59
92	Sugarcane_grower	3	7	5	5	7	4	7	5	5	7	4	4	7	7	5		7	4	7	7	7	4	7	5	90
93	Sugarcane_grower	2	7	0	1	7	0	7	0	1	3	0	0	7	0	0		7	0	7	0	7	0	3	0	50.5
94	Sugarcane_grower	3	7	7	5	5	4	7	4	5	7	4	6	7	6	5		7	4	7	6	7	6	7	5	97
95	Sugarcane_grower	3	6	3	3	5	2	7	3	3	6	3	3	6	3	2		7	2	6	3	7	3	6	2	73
96	Sugarcane_grower	3	7	4	4	7	4	7	4	4	7	2	2	2	2	2		7	4	2	2	7	2	7	2	70.5
97	Sugarcane_grower	3	7	5	3	7	5	7	4	4	5	2	4	5	3	7		7	5	5	3	7	4	5	7	87
98	Sugarcane_grower	2	7	0	1	7	0	7	0	1	3	0	0	7	0	0		7	0	7	0	7	0	3	0	50.5
99	Sugarcane_grower	3	7	7	5	5	4	7	4	5	7	4	6	7	6	5		7	4	7	6	7	6	7	5	97
100	Sugarcane_grower	3	6	3	3	5	2	7	3	3	6	3	3	6	3	2		7	2	6	3	7	3	6	2	73
101	Sugarcane_control	3	6	2	7	6	2	1	0	2	2	0	0	0	1	0		7	2	0	1	3	0	2	0	34
102	Sugarcane_control	3	7	0	7	7	3	1	0	2	3	0	0	0	0	6		7	3	0	0	3	0	3	6	39.5
103	Sugarcane_control	3	7	0	3	7	0	1	0	2	3	0	0	7	0	1		7	0	7	0	3	0	3	1	35
104	Sugarcane_control	3	7	7	7	7	0	1	0	2	7	2	0	0	0	1		7	0	0	0	5	0	7	1	38
105	Sugarcane_control	3	7	0	7	7	1	1	0	2	3	0	0	0	0	1		7	1	0	0	3	0	3	1	31
106	Sugarcane_control	3	7	2	7	7	1	1	0	2	1	0	0	0	0	1		7	1	0	0	3	0	1	1	30
107	Sugarcane_control	3	7	0	3	7	0	1	0	2	0	0	0	0	0	1		7	0	0	0	3	0	0	1	26.5
108	Sugarcane_control	3	7	2	1	7	2	1	0	1	3	0	0	0	0	7		7	2	0	0	2	0	3	7	33
109	Sugarcane_control	3	7	0	1	7	0	1	0	2	1	0	0	0	0	1		7	0	0	0	3	0	1	1	27
110	Sugarcane_control	3	7	3	4	7	2	2	2	2	1	0	0	0	0	1		7	2	0	0	6	0	1	1	45
111	Sugarcane_control	3	7	0	2	7	1	2	0	2	1	2	0	7	0	1		7	1	7	0	6	0	1	1	49
112	Sugarcane_control	3	7	0	1	7	0	2	0	0	1	0	0	0	0	1		7	0	0	0	2	0	1	1	23
113	Sugarcane_control	3	6	1	2	5	3	0	0	1	2	3	0	0	4	1		7	3	0	4	4	0	2	1	44.5
114	Sugarcane_control	3	3	3	4	4	3	1	1	1	1	1	0	0	1	1		7	3	0	1	4	0	1	1	41
115	Sugarcane_control	2	2	2	2	2	3	2	2	1	1	2	0	0	2	1		7	3	0	2	7	0	1	1	54
116	Sugarcane_control	3	7	3	1	7	3	2	0	2	3	1	0	0	4	1		7	3	0	4	5	0	3	1	49
117	Sugarcane_control	3	7	0	0	7	0	0	0	2	7	0	0	0	1	1		7	0	0	1	2	0	7	1	27
118	Sugarcane_control	3	3	2	2	3	2	0	0	0	3	2	0	2	2	2		7	2	2	2	2	0	3	2	34.5
119	Sugarcane_control	3	4	1	0	3	1	1	1	2	1	3	0	0	2	1		7	1	0	2	7	0	1	1	48
120	Sugarcane_control	3	4	4	2	2	3	0	0	0	3	2	0	0	2	3		7	3	0	2	2	0	3	3	36
121	Sugarcane_control	3	7	6	5	7	3	2	1	1	4	1	0	3	2	5		7	3	3	2	5	0	4	5	52.5
122	Sugarcane_control	3	7	7	5	7	3	0	0	0	7	2	0	3	2	7		7	3	3	2	2	0	7	7	43
123	Sugarcane_control	3	3	3	2	2	2	0	0	0	2	7	0	2	2	2		7	2	2	2	7	0	2	2	54
124	Sugarcane_control	3	7	6	3	4	2	1	0	0	4	3	0	6	3	0		7	2	6	3	4	0	4	0	47
125	Sugarcane_control	3	7	6	3	5	2	1	0	0	5	3	0	4	5	0		7	2	4	5	4	0	5	0	47.5
126	Sugarcane_control	2	7	3	0	4	0	1	0	0	5	0	0	0	2	0		7	0	0	2	1	0	5	0	22.5
127	Sugarcane_control	3	7	7	5	7	3	1	1	1	7	3	0	0	0	0		7	3	0	0	6	0	7	0	50.5
128	Sugarcane_control	3	7	7	6	7	3	2	0	2	7	0	0	0	0	1		7	3	0	0	4	0	7	1	43
129	Sugarcane_control	3	6	3	1	4	1	2	1	1	4	1	0	5	5	0		7	1	5	5	5	0	4	0	49
130	Sugarcane_control	3	2	3	3	3	3	2	0	2	4	2	1	3	3	0		7	3	3	3	6	1	4	0	59
131	Sugarcane_control	3	3	3	2	0	3	2	0	0	0	2	1	1	1	0		7	3	1	1	4	1	0	0	45
132	Sugarcane_control	3	6	6	5	5	3	2	1	2	4	1	1	2	1	0		7	3	2	1	6	1	4	0	56
133	Sugarcane_control	3	7	7	7	7	3	1	1	1	3	1	1	7	1	0		7	3	7	1	4	1	3	0	52.5
134	Sugarcane_control	3	7	7	3	7	3	1	1	1	3	4	1	7	5	1		7	3	7	5	7	1	3	1	69
135	Sugarcane_control	3	7	6	6	7	3	2	2	2	3	1	1	0	1	1		7	3	0	1	7	1	3	1	58
136	Sugarcane_control	3	7	7	4	7	5	0	0	0	3	1	1	7	1	5		7	5	7	1	1	1	3	5	49
137	Sugarcane_control	3	7	7	6	7	5	2	2	1	3	1	1	7	1	1		7	5	7	1	6	1	3	1	67
138	Sugarcane_control	3	7	7	5	7	4	1	2	1	3	1	1	7	1	1		7	4	7	1	5	1	3	1	60
139	Sugarcane_control	3	7	7	7	7	6	1	2	1	3	1	2	5	5	1		7	6	5	5	5	2	3	1	72
140	Sugarcane_control	3	7	7	7	7	5	1	2	1	3	1	2	7	1	1		7	5	7	1	5	2	3	1	67
141	Sugarcane_control	3	7	5	7	7	5	1	2	1	3	1	2	7	1	2		7	5	7	1	5	2	3	2	67.5
142	Sugarcane_control	3	7	7	5	7	6	1	0	1	3	1	3	7	1	7		7	6	7	1	3	3	3	7	69
143	Sugarcane_control	3	7	6	4	7	4	1	0	1	3	1	2	5	1	2		7	4	5	1	3	2	3	2	54.5
144	Sugarcane_control	3	7	7	5	7	4	1	0	1	7	2	2	4	1	2		7	4	4	1	4	2	7	2	59.5
145	Sugarcane_control	3	0	4	0	0	0	1	3	1	5	0	0	0	0	2		4	0	0	0	5	0	5	2	31.5
146	Sugarcane_control	3	7	2	0	2	0	1	2	2	1	0	1	1	1	2		7	0	1	1	5	1	1	2	41.5
147	Sugarcane_control	3	2	2	2	7	3	1	2	5	5	0	3	1	1	2		7	3	1	1	7	3	5	2	68.5
148	Sugarcane_control	3	7	2	0	7	0	1	2	0	2	0	0	7	1	2		7	0	7	1	3	0	2	2	36
149	Sugarcane_control	3	5	1	2	1	1	1	2	2	3	2	1	3	1	2		7	1	3	1	7	1	3	2	55.5
150	Sugarcane_control	3	7	5	0	7	0	7	2	0	5	0	0	7	1	0		7	0	7	1	7	0	5	0	52.5
151	Sugarcane_control	3	7	4	4	4	1	0	2	0	3	1	0	0	7	0		7	1	0	7	3	0	3	0	37.5
152	Sugarcane_control	3	7	0	0	0	2	2	4	0	1	0	0	0	1	0		7	2	0	1	6	0	1	0	45.5
153	Sugarcane_control	4	2	3	2	2	2	7	4	2	0	3	0	0	0	4		7	2	0	0	7	0	0	4	50
154	Sugarcane_control	3	7	0	2	7	2	2	0	0	2	0	0	7	0	0		7	2	7	0	2	0	2	0	36
155	Sugarcane_control	3	7	0	0	7	2	2	0	4	4	1	0	7	0	0		7	2	7	0	7	0	4	0	57
156	Sugarcane_control	2	4	5	7	4	3	2	0	3	3	0	1	7	1	0		7	3	7	1	5	1	3	0	56.5
157	Sugarcane_control	3	7	4	0	0	0	2	0	1	1	2	1	1	1	1		7	0	1	1	5	1	1	1	41
158	Sugarcane_control	3	7	0	0	2	0	2	1	2	7	0	3	0	1	2		7	0	0	1	5	3	7	2	51.5
159	Sugarcane_control	3	7	2	0	2	1	2		2	7	0	0	1	1	2		7	1	1	1	4	0	7	2	39.5
160	Sugarcane_control	3	7	0	3	0	0	2	0	0	0	3	0	0	2	1		7	0	0	2	5	0	0	1	36.5
161	Sugarcane_control	3	7	0	2	7	1	2	1	1	6	2	0	7	0	1		7	1	7	0	6	0	6	1	51.5
162	Sugarcane_control	3	7	7	7	7	5	1	3	1	1	1	5	1	1	1		7	5	1	1	6	5	1	1	76
163	Sugarcane_control	3	7	7	3	7	7	3	3	7	7	2	1	7	3	1		7	7	7	3	7	1	7	1	81
164	Sugarcane_control	3	7	0	0	3	1	3	3	2	7	1	1	7	1	1		7	1	7	1	7	1	7	1	61
165	Sugarcane_control	3	7	4	3	0	0	3	2	2	0	2	0	2	2	1		7	0	2	2	7	0	0	1	46.5
166	Sugarcane_control	2	3	3	4	3	1	7	2	3	5	2	3	3	4	3		7	1	3	4	7	3	5	3	68
167	Sugarcane_control	2	6	1	0	3	2	3	2	3	2	2	3	2	1	1		7	2	2	1	7	3	2	1	64.5
168	Sugarcane_control	2	5	0	0	4	0	3	2	0	1	2	0	2	1	0		7	0	2	1	7	0	1	0	45.5
169	Sugarcane_control	3	7	2	1	7	3	3	2	1	3	2	1	3	0	0		7	3	3	0	7	1	3	0	59.5
170	Sugarcane_control	3	7	4	2	3	1	3	2	2	1	2	0	0	0	0		7	1	0	0	7	0	1	0	45.5
171	Sugarcane_control	3	7	1	0	7	1	3	2	2	1	2	3	2	0	0		7	1	2	0	7	3	1	0	59.5
172	Sugarcane_control	3	7	0	0	7	2	3	2	1	1	1	1	0	0	0		7	2	0	0	7	1	1	0	52.5
173	Sugarcane_control	3	7	3	0	7	3	1	2	2	3	2	3	1	2	3		7	3	1	2	7	3	3	3	69
174	Sugarcane_control	3	7	2	3	7	0	2	2	2	3	1	1	3	3	3		7	0	3	3	7	1	3	3	55
175	Sugarcane_control	3	7	0	0	7	3	1	1	1	2	2	3	5	4	1		7	3	5	4	5	3	2	1	65.5
176	Sugarcane_control	3	7	0	1	7	3	2	1	3	2	3	2	4	5	6		7	3	4	5	7	2	2	6	72
177	Sugarcane_control	3	1	0	0	7	4	1	1	2	2	2	4	0	1	3		7	4	0	1	6	4	2	3	69.5
178	Sugarcane_control	3	7	6	5	5	4	2	1	4	5	2	3	4	2	4		7	4	4	2	7	3	5	4	76.5
179	Sugarcane_control	3	7	7	7	7	5	1	1	4	7	1	4	7	7	6		7	5	7	7	7	4	7	6	93.5
180	Sugarcane_control	3	7	6	5	7	6	2	1	5	7	2	5	7	7	5		7	6	7	7	7	5	7	5	100
181	Sugarcane_control	3	7	7	6	7	7	1	1	5	0	0	0	7	0	0		7	7	7	0	7	0	0	0	70
182	Sugarcane_control	3	7	3	7	7	7	2	1	1	0	7	1	7	7	7		7	7	7	7	7	1	0	7	84.5
183	Sugarcane_control	3	7	7	4	1	1	1	1	0	0	2	0	1	2	0		7	1	1	2	4	0	0	0	36
184	Sugarcane_control	3	7	6	3	7	6	2	1	3	1	1	3	3	2	0		7	6	3	2	7	3	1	0	77.5
185	Sugarcane_control	3	7	0	1	7	1	1	1	0	1	0	0	7	0	0		7	1	7	0	2	0	1	0	32.5
186	Sugarcane_control	3	7	3	2	7		1	1	1	1	0	2	7	0	0		7	0	7	0	3	2	1	0	41.5
187	Sugarcane_control	3	7	3	7	7	7	1	1	1	1	1	1	1	1	1		7	7	1	1	4	1	1	1	58
188	Sugarcane_control	3	7	7	3	7	4	1	1	1	1	1	1	1	1	1		7	4	1	1	4	1	1	1	49
189	Sugarcane_control	3	7	0	0	7	2	1	1	0	0	0	0	7	0	5		7	2	7	0	2	0	0	5	37.5
190	Sugarcane_control	3	7	7	7	7	5	1	1	4	1	4	4	7	7	0		7	5	7	7	7	4	1	0	87.5
191	Sugarcane_control	3	1	2	0	2	1	1	1	2	1	0	0	0	1	2		5	1	0	1	4	0	1	2	31.5
192	Sugarcane_control	3	2	0	3	0	0	1	1	0	1	2	0	5	0	0		5	0	5	0	4	0	1	0	31.5
193	Sugarcane_control	3	1	2	0	7	0	1	1	0	1	0	0	7	0	3		7	0	7	0	2	0	1	3	31
194	Sugarcane_control	3	6	0	0	3	2	1	2	2	0	1	1	1	1	0		7	2	1	1	6	1	0	0	50
195	Sugarcane_control	3	7	7	3	7	0	2	2	2	3	1	1	1	2	0		7	0	1	2	7	1	3	0	50.5
196	Sugarcane_control	3	6	2	0	6	2	2	2	2	2	1	1	7	1	0		7	2	7	1	7	1	2	0	61
197	Sugarcane_control	3	7	0	0	7	7	7	2	0	3	0	0	7	0	0		7	7	7	0	7	0	3	0	71.5
198	Sugarcane_control	3	7	0	3	7	0	7	2	3	3	0	0	7	0	0		7	0	7	0	7	0	3	0	50.5
199	Sugarcane_control	3	7	0	0	7	7	3	2	0	3	0	0	7	0	0		7	7	7	0	5	0	3	0	63.5
200	Sugarcane_control	3	7	0	3	7	0	3	2	3	3	0	0	7	0	0		7	0	7	0	7	0	3	0	50.5
201	Oilpalm_Worker	3	6	7	0	1	0	4	4	5	0	2	0	2	0	1		7	0	2	0	7	0	0	1	44.5
202	Oilpalm_Worker	2	6	7	1	1	1	6	4	4	0	1	1	1	1	0		7	1	1	1	7	1	0	0	51
203	Oilpalm_Worker	2	7	6	2	4	3	4	0	2	4	3	0	6	5	0		7	3	6	5	7	0	4	0	64
204	Oilpalm_Worker	2	7	6	0	0	0	0	0	0	0		0	0	0	0		7	0	0	0	0	0	0	0	14
205	Oilpalm_Worker	2	2	3	1	1	1	7	1	0	1	2	1	1	2	1		7	1	1	2	7	1	1	1	53
206	Oilpalm_Worker	3	3	2	1	2	0	7	0	0	1	2	2	0	0	1		7	0	0	0	7	2	1	1	51
207	Oilpalm_Worker	2	1	2	1	2	0	5	0	0	1	1	2	1	1	2		6	0	1	1	6	2	1	2	47.5
208	Oilpalm_Worker	2	2	2	0	1	1	3	0	0	0	2	2	1	2	2		5	1	1	2	5	2	0	2	45
209	Oilpalm_Worker	2	1	3	0	2	1		0	0	0	2	2	2	2	2		6	1	2	2	2	2	0	2	36
210	Oilpalm_Worker	2	2	3	0	0	0	0	0	1	1	1	1	1	1	1		5	0	1	1	2	1	1	1	25
211	Oilpalm_Worker	3	3	1	1	4	1	6	1	1	2	2	1	7	3	1		7	1	7	3	7	1	2	1	60.5
212	Oilpalm_Worker	3	2	4	1	1	6	1	1	1	3	1	7	1	1	1		7	6	1	1	4	7	3	1	80
213	Oilpalm_Worker	3	3	4	1		1	6	1	1	4	4	2	7	3	1		7	1	7	3	7	2	4	1	65.5
214	Oilpalm_Worker	3	1	6	1	1	1	5	1	1	1	2	1	7	1	1		7	1	7	1	7	1	1	1	58
215	Oilpalm_Worker	2	3	2	1	2	1	6	1	1	2	2	1	7	2	1		7	1	7	2	7	1	2	1	59.5
216	Oilpalm_Worker	3	3	7		3	1	4	2	2	4	1	2	4	6	6		7	1	4	6	7	2	4	6	68
217	Oilpalm_Worker	2	3	6	2	3	2	4	1		6	2	2	5	5	3		7	2	5	5	7	2	6	3	70.5
218	Oilpalm_Worker	2	3	4	1	7	3	5	1	1	4	2	1	4	4	2		7	3	4	4	7	1	4	2	66
219	Oilpalm_Worker	3	6	6	3	4	2	5	2	1	3	2	2	2	2	3		7	2	2	2	7	2	3	3	63
220	Oilpalm_Worker	2	3	6	1	0	1	4		3	3	3	3	3	2	2		7	1	3	2	7	3	3	2	64.5
221	Oilpalm_Worker	2	4	7	3	1	1	5	1		4	1	2	4	4	5		7	1	4	4	7	2	4	5	65.5
222	Oilpalm_Worker	3	2	4	4	1	4	2	4	2	2	2	2	2	2	2		7	4	2	2	7	2	2	2	68
223	Oilpalm_Worker	3	5	7	3	3	3	2	2	2	0	2	0	2	2	0		7	3	2	2	7	0	0	0	55
224	Oilpalm_Worker	3	3	2	3	2	2	2	2	2	2	2	2	2	2	2		7	2	2	2	7	2	2	2	62
225	Oilpalm_Worker	3	5	2	2	4	2	4	1	2	3	4	2	2	2	2		7	2	2	2	7	2	3	2	62.5
226	Oilpalm_Worker	3	4	3	1	4	1	5	1	1	3	2	1	1	3	2		7	1	1	3	7	1	3	2	55.5
227	Oilpalm_Worker	3	3	3	3	4	2	2	1	2	3	4	1	2	3	2		7	2	2	3	7	1	3	2	59.5
228	Oilpalm_Worker	3	3	3	3	3	3	2	1	2	3	4	2	2	1	2		7	3	2	1	7	2	3	2	64.5
229	Oilpalm_Worker	3	3	0	0	0	0	2	1	1	0	4	1	2	3	2		3	0	2	3	7	1	0	2	44
230	Oilpalm_Worker	3	4	2	0	0	0	0	1	1	3	4	1	1	2	2		6	0	1	2	6	1	3	2	45.5
231	Oilpalm_Worker	3	4	2	7	7	0	2	1	2	3	2	2	2	2	2		7	0	2	2	7	2	3	2	56.5
232	Oilpalm_Worker	3	4	7	7	7	0	2	1	2	2	2	2	2	3	2		7	0	2	3	7	2	2	2	57
233	Oilpalm_Worker	3	5	3	7	7	0	5	1	1		2	1	2	3	2		7	0	2	3	7	1	0	2	52
234	Oilpalm_Worker	3	5	7	7	7	0	5	1	1	3	4	1	2	3	2		7	0	2	3	7	1	3	2	53.5
235	Oilpalm_Worker	3	3	2	7	7	0	2	1	2	3	4	1	2	3	2		7	0	2	3	7	1	3	2	53.5
236	Oilpalm_Worker	3	3	7	7	7	0	5	1	2	3	2	2	2	2	2		7	0	2	2	7	2	3	2	56.5
237	Oilpalm_Worker	3	3	2	2	2	0	5	1	2	2	4		2	2	2		7	0	2	2	7	0	2	2	48
238	Oilpalm_Worker	3	4	3	3	3	0	2	1	2	3	2	1	2	3	2		7	0	2	3	7	1	3	2	53.5
239	Oilpalm_Worker	3	4	3	3	3	0	2	1		2	4	1	2	2	2		7	0	2	2	7	1	2	2	52
240	Oilpalm_Worker	3	4	4	4	5	0	5	1	1	3	4	1	2	3	2		7	0	2	3	7	1	3	2	53.5
241	Oilpalm_Worker	3	5	3	2	5	3	4	2	2	3	1	2	3	3	3		7	3	3	3	7	2	3	3	68
242	Oilpalm_Worker	3	4	4	3	3	3	3	2	1	4	4	3	2	2	3		7	3	2	2	7	3	4	3	70.5
243	Oilpalm_Worker	3	2	2	1	4	4	3	4	2	3	3	4	4	3	3		7	4	4	3	7	4	3	3	80
244	Oilpalm_Worker	2	5	2	2	2	2	2	2	2	2	2	1	1	0	0		7	2	1	0	7	1	2	0	54
245	Oilpalm_Worker	3	3	3	4	4	3	3	3	0	5	4	3	3	4	4		7	3	3	4	7	3	5	4	74.5
246	Oilpalm_Worker	3	2	4	3	3	4	2	2	2	3	4	3	4	3	4		7	4	4	3	7	3	3	4	76.5
247	Oilpalm_Worker	3	2	2	3	4	4	2	2	2	2	2	2	3	2	2		7	4	3	2	7	2	2	2	69
248	Oilpalm_Worker	3	2	2	3	4	4	1	2	2	3	3	3		3	4		7	4	0	3	7	3	3	4	72.5
249	Oilpalm_Worker	3	2	2	3	4	4	4	3	3	2	4	4	2	3	3		7	4	2	3	7	4	2	3	77.5
250	Oilpalm_Worker	2	2	2	3	3	4	3	4	4	1	2	3	4	3	2		7	4	4	3	7	3	1	2	74.5
251	Oilpalm_Worker	3	2	3	4	2	3	3	2	3	4	2	2	3	3	2		7	3	3	3	7	2	4	2	68
252	Oilpalm_Worker	3	2	4	4	3	3	2	3	3	1	2	2	3	4	4		7	3	3	4	7	2	1	4	68.5
253	Oilpalm_Worker	2	2	2	4	2	2	3	3	4	4	2	2	4	3	2		7	2	4	3	7	2	4	2	66
254	Oilpalm_Worker	3	2	2	4	3	3	2	1	2	2	4	4	3	4	4		7	3	3	4	7	4	2	4	77
255	Oilpalm_Worker	3	2	4	3	3	4	4	4	4	4	4	3	2	2	4		7	4	2	2	7	3	4	4	74
256	Oilpalm_Worker	3	2	4	2	3	3	4	4	4	2	4	3	4	4	4		7	3	4	4	7	3	2	4	74
257	Oilpalm_Worker	3	3	2	2	4	3	3	2	2	1	2	2	1	1	3		7	3	1	1	7	2	1	3	63
258	Oilpalm_Worker	3	3	3	5	5	4	2	2	4	4	4	6	2	2	3		7	4	2	2	7	6	4	3	85.5
259	Oilpalm_Worker	3	2	1	2	4	4	3	3	2	2	1	4	2	3	2		7	4	2	3	7	4	2	2	77
260	Oilpalm_Worker	3	2	2	2	4	2	4	3	2	2	4	3	3	4	4		7	2	3	4	7	3	2	4	70
261	Oilpalm_Worker	3	2	3	3	2	1	3	3	3	3	4	2	3	3	4		7	1	3	3	7	2	3	4	62.5
262	Oilpalm_Worker	3	4	2	2	2	3	2		2	2	2	2	2	2	2		7	3	2	2	6	2	2	2	61
263	Oilpalm_Worker	3	4	4	4	4	4	4	0	0	0	0	0	0	0	0		7	4	0	0	4	0	0	0	42
264	Oilpalm_Worker	3	4	4	4	5	5	5	0	0	0	0	0	0	0	0		7	5	0	0	5	0	0	0	49
265	Oilpalm_Worker	3	4	4	4	4	4	4	0	0		0	0	0	1	0		7	4	0	1	4	0	0	0	43
266	Oilpalm_Worker	3	4	3	4	4	4	3	4	3	2	2	3	4	4	3		7	4	4	4	7	3	2	3	76.5
267	Oilpalm_Worker	3	4	2	2	4	1	2	4	3	2	4	3	3	4	4		7	1	3	4	7	3	2	4	67
268	Oilpalm_Worker	3	4	4	4	4	4	4	4	3	4	2	1	3	3	2		7	4	3	3	7	1	4	2	67
269	Oilpalm_Worker	3	4	4	4	3	3	1	1	3	4	4	0	2	2	2		7	3	2	2	7	0	4	2	58
270	Oilpalm_Worker	3	4	3	3	4	3	4	4	4	4	2	2	3	3	4		7	3	3	3	7	2	4	4	69
271	Oilpalm_Worker	3	3	3	2	6	2	2	0	0	1	0	0	1	0	1		7	2	1	0	2	0	1	1	30
272	Oilpalm_Worker	3	7	7	7	0	0	0	0	0	0	0	0	0	0	0		7	0	0	0	0	0	0	0	14
273	Oilpalm_Worker	3	3	2	1	2	1	2	4	2		2	3	4	0	3		7	1	4	0	7	3	0	3	62.5
274	Oilpalm_Worker	3	4	2	3	2	3	4	4	3	2	2	6	6	3	2		7	3	6	3	7	6	2	2	86
275	Oilpalm_Worker	3	5	4	6	3	7	0	0	0	0	0	0	0		0		7	7	0	0	0	0	0	0	35
276	Oilpalm_Worker	3	7	6	4	3	7	0	0	0	0	0	0	0	0	0		7	7	0	0	0	0	0	0	35
277	Oilpalm_Worker	3	3	2	0	0	0	2	0	0	3	2	0	0	0	0		5	0	0	0	4	0	3	0	27.5
278	Oilpalm_Worker	3	4	4	3	4	2	2	0	1	2	2	0	0	0	0		7	2	0	0	5	0	2	0	41
279	Oilpalm_Worker	3	7	7	3	7	5	0	0	0	0	2	7	0	0	0		7	5	0	0	2	7	0	0	65
280	Oilpalm_Worker	3	2	2	4		2	2	2		2		2	0	2	2		7	2	0	2	4	2	2	2	48
281	Oilpalm_Worker	3	6	6	1	3	2	6	6	0	0	0	0	0	0	0		7	2	0	0	7	0	0	0	48
282	Oilpalm_Worker	3	4	3	2	2	3	0	0	0	0	0	0	0	0	0		7	3	0	0	0	0	0	0	23
283	Oilpalm_Worker	3	2	2	2	2	2	2	1	2	2	1	1	3	3	0		7	2	3	3	6	1	2	0	55
284	Oilpalm_Worker	3	2	2	2	2	2	2	2	2	2	2	2	2	2	0		7	2	2	2	7	2	2	0	61
285	Oilpalm_Worker	3	6	7	6	4	7	0	0	0	0	0	0	0	0	0		7	7	0	0	0	0	0	0	35
286	Oilpalm_Worker	2	2	2	0	2	3	0	1	2	4	1	2	2	2	1		6	3	2	2	4	2	4	1	51.5
287	Oilpalm_Worker	3	2	7	2	3	1	1	4		2	1	3	1	1	2		7	1	1	1	6	3	2	2	57
288	Oilpalm_Worker	3	7	7	7	7	3	3	3	3	3	3	3	3	3	1		7	3	3	3	7	3	3	1	71
289	Oilpalm_Worker	3	2	2	3	3	2	2	2	5	1	2	2	1	2	2		7	2	1	2	7	2	1	2	60.5
290	Oilpalm_Worker	3	2	2		2	4	2	1		2	1	5	2	2	2		6	4	2	2	4	5	2	2	66
291	Oilpalm_Worker	2	2	5	2	1	1	7	1	1	2	1	1	2	2	2		7	1	2	2	7	1	2	2	55
292	Oilpalm_Worker	3	3	3	3	1	1	3	2	2	2	2	2		2	2		7	1	0	2	7	2	2	2	57
293	Oilpalm_Worker	2	4	7	7	4	2	0	0	0	0	0	0	0	0	0		7	2	0	0	0	0	0	0	20
294	Oilpalm_Worker	3	2	5	0	4		7	2	2	0	3	0	0	0	0		7	0	0	0	7	0	0	0	42
295	Oilpalm_Worker	3	1	1	1	1	1	1	1	1	1	1	1	1	1	1		4	1	1	1	4	1	1	1	34
296	Oilpalm_Worker	3	2	2	2	2	2	2	2	1	1	1	1	3	3	3		7	2	3	3	6	1	1	3	56
297	Oilpalm_Worker	3	4		2	2	6	3	3	3	3	1	0	2	2			7	6	2	2	7	0	3	0	65.5
298	Oilpalm_Worker	1	1	1	1	1	1	1	1	2	2	4	0	2	2	2		4	1	2	2	7	0	2	2	45
299	Oilpalm_Worker	3	7	7	7	7	4	3	5	7	2	7	1	1	1	5		7	4	1	1	7	1	2	5	63.5
300	Oilpalm_Worker	3	7	7	7	7	2	5	3	4	5	6	2	3	4	5		7	2	3	4	7	2	5	5	68
301	Oilpalm_Outgrower	3	2	1	1	4	1	5	3	2	1	2	3	4	1	4		7	1	4	1	7	3	1	4	64.5
302	Oilpalm_Outgrower	3	5	3	4	4	3	3	2	2	2	3	1	5	3	3		7	3	5	3	7	1	2	3	65.5
303	Oilpalm_Outgrower	3	6	2	0	3	4	7	7	7	4	0	7	7	3	4		7	4	7	3	7	7	4	4	96
304	Oilpalm_Outgrower	3	7	2	0	3	7	7	3	2	2	3	2	7	2	3		7	7	7	2	7	2	2	3	82.5
305	Oilpalm_Outgrower	3	7	3	0	7	4	7	3	2	3	1	0	5	4	0		7	4	5	4	7	0	3	0	64.5
306	Oilpalm_Outgrower	3	7	3	2	3	3	4	2	1	7	2	0	7	3	0		7	3	7	3	7	0	7	0	64.5
307	Oilpalm_Outgrower	2	2	1	0	3	1	1	0	1	1	0	0	0	0	0		6	1	0	0	2	0	1	0	23.5
308	Oilpalm_Outgrower	3	2	1	0	3	1	1	0	1	1	0	0	0	0	0		6	1	0	0	2	0	1	0	23.5
309	Oilpalm_Outgrower	3	4	5	3	4	3	7	6	4	5	4	3	4	5	2		7	3	4	5	7	3	5	2	75.5
310	Oilpalm_Outgrower	3	4	5	3	4	3	7	6	4	5	4	3	4	5	2		7	3	4	5	7	3	5	2	75.5
311	Oilpalm_Outgrower	3	4	5	3	4	3	7	6	4	5	4	3	4	5	2		7	3	4	5	7	3	5	2	75.5
312	Oilpalm_Outgrower	3	7	3	4	2	3	4	5	2	3	4	3	5	6	7		7	3	5	6	7	3	3	7	79
313	Oilpalm_Outgrower	3	5	4	3	4	2	2	2	2	2	3	1	4	3	4		7	2	4	3	7	1	2	4	62
314	Oilpalm_Outgrower	3	1	2		2	4	3	4	0	0	4	3	0	2	4		5	4	0	2	7	3	0	4	66
315	Oilpalm_Outgrower	3	2	3	1	3	2	7	1	1	2	1	2	1	2	3		7	2	1	2	7	2	2	3	61.5
316	Oilpalm_Outgrower	3	3	3	2	3	1	7	1	2	2	1	1	2	1	2		7	1	2	1	7	1	2	2	54
317	Oilpalm_Outgrower	3	3	2	1	3	1	7	1	1	2	2	2	1	2	2		7	1	1	2	7	2	2	2	58
318	Oilpalm_Outgrower	3	3	4	2	3	1	5	2	1	2	1	2	2	2	3		7	1	2	2	7	2	2	3	59.5
319	Oilpalm_Outgrower	3	7	6	0	6	3	6	6	6	6	0	0	0	0	0		7	3	0	0	7	0	6	0	54
320	Oilpalm_Outgrower	3	7	6	0	6	0	6	5	6		0	0	6	0	0		7	0	6	0	7	0	0	0	48
321	Oilpalm_Outgrower	3	4	3	0	7	0	7	7	7	7	0	0	7	0	0		7	0	7	0	7	0	7	0	52.5
322	Oilpalm_Outgrower	3	3	4	1	4		6			3	2	1	3	4	2		7	0	3	4	7	1	3	2	55.5
323	Oilpalm_Outgrower	3	3	1	1	3	1	7	1	1	1	1		7	6			7	1	7	6	7	0	1	0	58.5
324	Oilpalm_Outgrower	3		3	0	7	3	7			3	4		3	2	2		7	3	3	2	7	0	3	2	58.5
325	Oilpalm_Outgrower	3	7	6	0	0	0	6	3	3		2	0	0	0	0		7	0	0	0	7	0	0	0	42
326	Oilpalm_Outgrower	3	3	5	0	4	2	7	3	2	3	0	0	1	2	3		7	2	1	2	7	0	3	3	54
327	Oilpalm_Outgrower	4	4	3	0	4	1	7	2	4	0	0	2	0	0	0		7	1	0	0	7	2	0	0	53
328	Oilpalm_Outgrower	3	1	3	0	2	0	7		1	0	0	0	0	0	0		6	0	0	0	7	0	0	0	40
329	Oilpalm_Outgrower	2	4	1	2	2	1	1	1	1	0	0	0	0	0	0		7	1	0	0	3	0	0	0	29
330	Oilpalm_Outgrower	3	5	2	1	2	0	1	0	0	0	2	2	0	0	0		7	0	0	0	3	2	0	0	34
331	Oilpalm_Outgrower	3	2	1	1	5	1	6	1	1	1	2	1	7	1	1		7	1	7	1	7	1	1	1	58
332	Oilpalm_Outgrower	3	2	1	1	5	1	6	1	1	2	2	2	6	2	1		7	1	6	2	7	2	2	1	62.5
333	Oilpalm_Outgrower	3	1	1	1	6	1	6	1	1	2	2	2	6	2	1		7	1	6	2	7	2	2	1	62.5
334	Oilpalm_Outgrower	3	2	5	1	1	1	5	2	2	2	3	4	7	3	4		7	1	7	3	7	4	2	4	74
335	Oilpalm_Outgrower	3	6	4	2	5	3	4	5	4	6	4	2	5	6	1		7	3	5	6	7	2	6	1	73.5
336	Oilpalm_Outgrower	3	6	4	5	6	3	4	5	4	5	5	3	7	7	2		7	3	7	7	7	3	5	2	80.5
337	Oilpalm_Outgrower	3	5	6	3	4	5	6	4	5	4	4	2	6	7	3		7	5	6	7	7	2	4	3	81.5
338	Oilpalm_Outgrower	3	4	6	3	5	2	7	4	5	5	4	2	5	6	4		7	2	5	6	7	2	5	4	71.5
339	Oilpalm_Outgrower	3	4	4	2	2	3	4	2	3	2	2	1	2	3	2		7	3	2	3	7	1	2	2	62
340	Oilpalm_Outgrower	3	5	3	2	6	3	3	3	2	3	2	3	2	3	2		7	3	2	3	7	3	3	2	70.5
341	Oilpalm_Outgrower	3	6	3	2	5	3	5	3	2	3	3	2	3	4	2		7	3	3	4	7	2	3	2	68.5
342	Oilpalm_Outgrower	3	5	3	3	6	2	4	2	3	3	1	3	4	3	3		7	2	4	3	7	3	3	3	70
343	Oilpalm_Outgrower	3	4	5	2	6	2	7	4	3	2			2	3	1		7	2	2	3	7	0	2	1	54.5
344	Oilpalm_Outgrower	3	3	7	2	3	2	7	3	3	5	3	1	7	7	2		7	2	7	7	7	1	5	2	69.5
345	Oilpalm_Outgrower	3	6	5	1	6	4	5	6	5	4	3	2	5	6	1		7	4	5	6	7	2	4	1	75.5
346	Oilpalm_Outgrower	3	6	5	4	6	4	3	4	5	6	3	2	6	6	1		7	4	6	6	7	2	6	1	77.5
347	Oilpalm_Outgrower	3	6	4	2	5	2	6	5	4	3	4	1	6	6	1		7	2	6	6	7	1	3	1	66
348	Oilpalm_Outgrower	3	6	4	5	7	2	6	5	6	4	4	2	6	6	1		7	2	6	6	7	2	4	1	70.5
349	Oilpalm_Outgrower	3	4	2	3	2	2	7	1	1	2	2	2	4	5	4		7	2	4	5	7	2	2	4	68
350	Oilpalm_Outgrower	3	4	3	2	3	3	2	4	2	3	2	1	3	2	2		7	3	3	2	7	1	3	2	62.5
351	Oilpalm_Outgrower	3	3	7	2	7	3	7	3	2	3	2	1	7	7			7	3	7	7	7	1	3	0	70.5
352	Oilpalm_Outgrower	3	3	7		3	4	7	2	1	2			7	4			7	4	7	4	7	0	2	0	66
353	Oilpalm_Outgrower	3	7	3	2	7	3	7	3	1	3	2	1	7	2	3		7	3	7	2	7	1	3	3	67
354	Oilpalm_Outgrower	3	4	5	3	4	3	7	6	4	5	4	3	4	5	2		7	3	4	5	7	3	5	2	75.5
355	Oilpalm_Outgrower	3	4	5	4	6	6	7	5	3	4	3	4	6	7	3		7	6	6	7	7	4	4	3	92.5
356	Oilpalm_Outgrower	3	4	5	3	4	3	7	6	4	5	4	3	4	6	2		7	3	4	6	7	3	5	2	76.5
357	Oilpalm_Outgrower	3	4	5	4	6	6	7	5	3	4	3	4	6	7	3		7	6	6	7	7	4	4	3	92.5
358	Oilpalm_Outgrower	3	4	1	1	2	1	1	1	1	1	1	1	1	1			7	1	1	1	4	1	1	0	39.5
359	Oilpalm_Outgrower	3	5	4	3	4	3	7	3	3	3	3	2	4	5	3		7	3	4	5	7	2	3	3	71
360	Oilpalm_Outgrower	3	5	4	3	4	3	7	3	3	3	3	2	4	5	3		7	3	4	5	7	2	3	3	71
361	Oilpalm_Outgrower	3	4	3		7		7	7	7	7	7		7				7	0	7	0	7	0	7	0	52.5
362	Oilpalm_Outgrower	2	5	3	3	3	1	5	2		2			3		3		7	1	3	0	7	0	2	3	50.5
363	Oilpalm_Outgrower	3	5	4	3	4	2	7	4	5	5	2	2	4	5	3		7	2	4	5	7	2	5	3	69
364	Oilpalm_Outgrower	3	5	4	3	4	2	7	4	5	5	2	2	4	5	3		7	2	4	5	7	2	5	3	69
365	Oilpalm_Outgrower	3	5	4	3	4	2	7	4	5	5	2	2	4	5	3		7	2	4	5	7	2	5	3	69
366	Oilpalm_Outgrower	3	5	4	3	4	2	7	4	5	5	2	2	4	5	3		7	2	4	5	7	2	5	3	69
367	Oilpalm_Outgrower	3	7	6		6		7	6	6		2		6				7	0	6	0	7	0	0	0	48
368	Oilpalm_Outgrower	3	5	3	2	4	3	3	2	2	3	1	1	5	4	3		7	3	5	4	7	1	3	3	67
369	Oilpalm_Outgrower	3	5	3	3	5	2	3	2	2	2	3	1	5	2	3		7	2	5	2	7	1	2	3	61.5
370	Oilpalm_Outgrower	3	5	4	4	3	2	3	2	2	2	2	1	4	4	3		7	2	4	4	7	1	2	3	62.5
371	Oilpalm_Outgrower	3	5					3	2		1	1	2			1		5	0	0	0	6	2	1	1	43
372	Oilpalm_Outgrower	3	4	3	3	4	4	2	1	1	2	3	1	4	2	3		7	4	4	2	7	1	2	3	66.5
373	Oilpalm_Outgrower	2	2	5	2	5	1	3	3	2	3	2	1	4	1	4		7	1	4	1	7	1	3	4	57.5
374	Oilpalm_Outgrower	2	3	2	2	4	2	4	2	2	1	3	2	1	1	4		7	2	1	1	7	2	1	4	60.5
375	Oilpalm_Outgrower	2	4	3		5		3				2	3			4		7	0	0	0	5	3	0	4	48
376	Oilpalm_Outgrower	3	4	1	1	2	1	1	1	1	1	1	1	1	1	1		7	1	1	1	4	1	1	1	40
377	Oilpalm_Outgrower	3	4	2	1	2	1	1	1	1	1	1	1	1	1			7	1	1	1	4	1	1	0	39.5
378	Oilpalm_Outgrower	3	4	2	1	3	1	1	1	1	1	1						7	1	0	0	4	0	1	0	33.5
379	Oilpalm_Outgrower	3	4	5		4	3	7	3	2	3	2	2	4	5	3		7	3	4	5	7	2	3	3	71
380	Oilpalm_Outgrower	3	4	5	3	4	4	7	7	3	4	2	2	4	5	3		7	4	4	5	7	2	4	3	74.5
381	Oilpalm_Outgrower	3	7	5		7		7	4	3				7				7	0	7	0	7	0	0	0	49
382	Oilpalm_Outgrower	4	7	6		6		7	6	6				6				7	0	6	0	7	0	0	0	48
383	Oilpalm_Outgrower	3	5	4	3	4	2	2	2	2	3	1	1	4	3	4		7	2	4	3	7	1	3	4	62.5
384	Oilpalm_Outgrower	3	7	5		6		7	5	2				2				7	0	2	0	7	0	0	0	44
385	Oilpalm_Outgrower	3	7			7		7	2	5								7	0	0	0	7	0	0	0	42
386	Oilpalm_Outgrower	3	5	3	3	4	3	2	1	2	2	2	4	3	4	4		7	3	3	4	7	4	2	4	77
387	Oilpalm_Outgrower	3	5	3	3	4	2	3	2	1	3	3	2	4	2	3		7	2	4	2	7	2	3	3	65
388	Oilpalm_Outgrower	3	4	2	1	2	2	3	2	1	1	3	2	1	1	4		7	2	1	1	7	2	1	4	60.5
389	Oilpalm_Outgrower	5	1	2	2	1	3	2	2	3	2	1	2	2	2	2		6	3	2	2	7	2	2	2	63
390	Oilpalm_Outgrower	2	5	4	1	4	3	4	1	2	3	2	4	1	1	2		7	3	1	1	7	4	3	2	71.5
391	Oilpalm_Outgrower	3	7	3	4	2	4	4	2	3	4	2	3	5	6	7		7	4	5	6	7	3	4	7	82.5
392	Oilpalm_Outgrower	3	5	3	2	4	3	4	5	4	1	2	2	2	2			7	3	2	2	7	2	1	0	63.5
393	Oilpalm_Outgrower	3	6	4	3	5	4	6	4	3	5	3	3	5	3	3		7	4	5	3	7	3	5	3	78
394	Oilpalm_Outgrower	3	3	4	3	5	2	4	4	1	2	3	2	3	2	3		7	2	3	2	7	2	2	3	63.5
395	Oilpalm_Outgrower	3	6	4	2	6	3	5	3	3	2	2	3	1	3	2		7	3	1	3	7	3	2	2	69
396	Oilpalm_Outgrower	3	3	3		5		7			4	2	1	2	2	3		7	0	2	2	7	1	4	3	53.5
397	Oilpalm_Outgrower	3	1	6	3	3	3			3	4	2	1	3	3	3		7	3	3	3	5	1	4	3	56.5
398	Oilpalm_Outgrower	2	0	7	1	0	2	1	4	3	2	4	7	0	3	1		7	2	0	3	7	7	2	1	80.5
399	Oilpalm_Outgrower	3	4	3		2		7	4	4	2	4	4	7	7			7	0	7	7	7	4	2	0	73
400	Oilpalm_Outgrower	3	1	6	3	3	2	2	0	3	2	2	0	4	4	2		7	2	4	4	7	0	2	2	58
401	Oilpalm_Independent_smallholder	2	4	0	2	3	0	7	3	2	7	1	0	7	3	0		7	0	7	3	7	0	7	0	55.5
402	Oilpalm_Independent_smallholder	3	0	0	0	7	3	7	7	4	7	0	0	7	0	3		7	3	7	0	7	0	7	3	63
403	Oilpalm_Independent_smallholder	3	3	2		7		7	1	1	7	2	1	7	1	0		7	0	7	1	7	1	7	0	57.5
404	Oilpalm_Independent_smallholder	3	7	3		6		7	3	2	7	0	0	0	1	1		7	0	0	1	7	0	7	1	47
405	Oilpalm_Independent_smallholder	3	1	1	1	5	1	5	1	1	2	2	1	4	6	1		7	1	4	6	7	1	2	1	60.5
406	Oilpalm_Independent_smallholder	3	3	3	1	1	1	3	1	4	3	3	3	7	2	1		7	1	7	2	7	3	3	1	68
407	Oilpalm_Independent_smallholder	3	6	5	2	5	4	3	4	5	6	2	3	4	5	2		7	4	4	5	7	3	6	2	79
408	Oilpalm_Independent_smallholder	3	6	3	2	5	4	5	3	4	6	4	2	5	6	1		7	4	5	6	7	2	6	1	76.5
409	Oilpalm_Independent_smallholder	3	3	4	2	2	1	7		2	5	3	0	0	3	5		7	1	0	3	7	0	5	5	53
410	Oilpalm_Independent_smallholder	3	4	5	3	6	5	6	4	5	4	3	2	3	7	4		7	5	3	7	7	2	4	4	79
411	Oilpalm_Independent_smallholder	3	5	6	4	4	4	7	1	1	5	4	2	4	6	3		7	4	4	6	7	2	5	3	76
412	Oilpalm_Independent_smallholder	3	5	6	4	5	4	7	1	1	5	3	2	4	6	3		7	4	4	6	7	2	5	3	76
413	Oilpalm_Independent_smallholder	3	2	1	1	5	1	7	1	1	1	1	1	1	1	1		7	1	1	1	7	1	1	1	52
414	Oilpalm_Independent_smallholder	3	5	4	3	6	4	7	4	5	6	5	4	6	7	1		7	4	6	7	7	4	6	1	86.5
415	Oilpalm_Independent_smallholder	3	3	4	2	2	1	7	2	1	3	2	1	3	3	2		7	1	3	3	7	1	3	2	57.5
416	Oilpalm_Independent_smallholder	3	3	4	2	3	2	7	2	3	4	3		3	5	5		7	2	3	5	7	0	4	5	60.5
417	Oilpalm_Independent_smallholder	3	5	4	3	4	3	7	2	2	2	1	4	5	5	3		7	3	5	5	7	4	2	3	79.5
418	Oilpalm_Independent_smallholder	3	4	5	3	6	5	5	4	5	4	3	2	3	7	4		7	5	3	7	7	2	4	4	79
419	Oilpalm_Independent_smallholder	3	2	2	1	5	1	6	1	4	1	1	1	7	3	1		7	1	7	3	7	1	1	1	60
420	Oilpalm_Independent_smallholder	3	5	3	3	4	2	7	2	2	2	2	1	4	6	5		7	2	4	6	7	1	2	5	65.5
421	Oilpalm_Independent_smallholder	2	2	4	1	1	1	1		2	3	1		3		1		7	1	3	0	4	0	3	1	38
422	Oilpalm_Independent_smallholder	2	4	3		3		3	2		3	0	0	0	0	0		7	0	0	0	5	0	3	0	35.5
423	Oilpalm_Independent_smallholder	3	4	5	3	6	4	7	5	4	4	3	3	4	4	4		7	4	4	4	7	3	4	4	78
424	Oilpalm_Independent_smallholder	3	5	3	4	5	0	0	0	0	0	2		5		3		7	0	5	0	2	0	0	3	28.5
425	Oilpalm_Independent_smallholder	3	2	2	1	2		5	0	1	1	1	2	4	3	2		7	0	4	3	7	2	1	2	58.5
426	Oilpalm_Independent_smallholder	3	1	4	4	3	3	4	0	4	3	3	1	2	1	5		7	3	2	1	7	1	3	5	62
427	Oilpalm_Independent_smallholder	3	4	1	4	3	0	0	0	0	0	2	4	3		2		7	0	3	0	2	4	0	2	42
428	Oilpalm_Independent_smallholder	3	4	3	3	2	4	5		2	4	3	1	2	2	2		7	4	2	2	7	1	4	2	65
429	Oilpalm_Independent_smallholder	3	4	3	4	5						2		3		3		7	0	3	0	2	0	0	3	26.5
430	Oilpalm_Independent_smallholder	3	5	4	2	3	2	2	1	1	2	1	1	1	2	3		7	2	1	2	5	1	2	3	49.5
431	Oilpalm_Independent_smallholder		5	2	4	5	4	4	1	1		1		5	4	4		7	4	5	4	7	0	0	4	65
432	Oilpalm_Independent_smallholder		4		4						2	3				4		7	0	0	0	3	0	2	4	29
433	Oilpalm_Independent_smallholder		7	5		6		7	7	4	7	2	2	6				7	0	6	0	7	2	7	0	59.5
434	Oilpalm_Independent_smallholder		7	6				7	4	3	4	2		7				7	0	7	0	7	0	4	0	51
435	Oilpalm_Independent_smallholder	3	7	6	4	5	6	7	4	2	6	1		6	4			7	6	6	4	7	0	6	0	73
436	Oilpalm_Independent_smallholder		7	3		3	6	6	6	6	6	2		6				7	6	6	0	7	0	6	0	69
437	Oilpalm_Independent_smallholder	3	7	3		3	6	7	7	7	7	3	2	7	7	7		7	6	7	7	7	2	7	7	89
438	Oilpalm_Independent_smallholder	3	5		4	4		3		3	3	2	2			3		7	0	0	0	7	2	3	3	53
439	Oilpalm_Independent_smallholder	3	7	6	6	4	6	7	7	7	7	2	4	7	7	7		7	6	7	7	7	4	7	7	97
440	Oilpalm_Independent_smallholder	3	7	6		7		7	7	7	7	4		7				7	0	7	0	7	0	7	0	52.5
441	Oilpalm_Independent_smallholder	3	5	6		2	7	7	2	3	4	2	3	5	3	2		7	7	5	3	7	3	4	2	86
442	Oilpalm_Independent_smallholder	2	2	3	4	3	4	5	3		4	5	3		1	1		7	4	0	1	7	3	4	1	69.5
443	Oilpalm_Independent_smallholder	3	2	3	4	4	3	2	4	3	5	3	6	2	1	2		7	3	2	1	7	6	5	2	81.5
444	Oilpalm_Independent_smallholder	3	5	6	2	1	3	2	4	4	2	4	5	1	1	3		7	3	1	1	7	5	2	3	75.5
445	Oilpalm_Independent_smallholder	3	5	1	1	7	1	6	1	2	2	1	1	1	1	1		7	1	1	1	7	1	2	1	52.5
446	Oilpalm_Independent_smallholder	3	4	5	3	4	3	7	6	4	5	4	3	4	5	2		7	3	4	5	7	3	5	2	75.5
447	Oilpalm_Independent_smallholder	3	6	4	3	5	4	6	4	3	5	3	3	5	3	3		7	4	5	3	7	3	5	3	78
448	Oilpalm_Independent_smallholder		2	3	1	2	1	7	2	1	3	1	2	2	3	2		7	1	2	3	7	2	3	2	60.5
449	Oilpalm_Independent_smallholder	3	6	7	6	7	5	7	4		6	7		7	7	5		7	5	7	7	7	0	6	5	76.5
450	Oilpalm_Independent_smallholder		6	7	6	7		5	2	3	5	6	4	2	7	1		7	0	2	7	7	4	5	1	70
451	Oilpalm_Independent_smallholder		6	7	3	6	5	7	5	4	2	4	4	7	4	1		7	5	7	4	7	4	2	1	85.5
452	Oilpalm_Independent_smallholder		5	6	6	7	3	7	3	2	5	7	2	7	7	5		7	3	7	7	7	2	5	5	78
453	Oilpalm_Independent_smallholder		3	4	5	2	2	2	2	2	2	2	7	7	7	2		7	2	7	7	7	7	2	2	92
454	Oilpalm_Independent_smallholder	3	3	4	2						2	1						7	0	0	0	1	0	2	0	19
455	Oilpalm_Independent_smallholder		4	3		2				2		2	2	4		2		7	0	4	0	4	2	0	2	43
456	Oilpalm_Independent_smallholder		5	2	3	2	2	2	2	2	2	1	1	1	1	3		7	2	1	1	7	1	2	3	56.5
457	Oilpalm_Independent_smallholder	3	3	5		2												7	0	0	0	0	0	0	0	14
458	Oilpalm_Independent_smallholder		3	7		7		7	4	4	3			7	5			7	0	7	5	7	0	3	0	55.5
459	Oilpalm_Independent_smallholder	3	7	3	2	4	3	7	3	1	3		2	3	4			7	3	3	4	7	2	3	0	67.5
460	Oilpalm_Independent_smallholder	3	5	4	3	4	3	7	2	2	2	2	1	4	5	3		7	3	4	5	7	1	2	3	66.5
461	Oilpalm_Independent_smallholder	3	4	3		2		5			2	1	1	5	1	3		7	0	5	1	6	1	2	3	50.5
462	Oilpalm_Independent_smallholder		1	4		7	7	7	7	7		4		7				7	7	7	0	7	0	0	0	70
463	Oilpalm_Independent_smallholder	3	7	6		6		6	6	6	6							7	0	0	0	7	0	6	0	45
464	Oilpalm_Independent_smallholder		7	5	3	7	3	7	7	7		1		4				7	3	4	0	7	0	0	0	55
465	Oilpalm_Independent_smallholder	3	7	6		5		7	7	7	7	2		7				7	0	7	0	7	0	7	0	52.5
466	Oilpalm_Independent_smallholder	3	4	2	2	5	2	3	2	2	2	2	1	5	3	2		7	2	5	3	7	1	2	2	62
467	Oilpalm_Independent_smallholder	3	5	3	4	4	2	2	1	2	3	2	1	5	4	2		7	2	5	4	7	1	3	2	63.5
468	Oilpalm_Independent_smallholder	3	5	3	4	4	2	2	1	2	3	2	1	5	4	2		7	2	5	4	7	1	3	2	63.5
469	Oilpalm_Independent_smallholder	3	5	2	3	5	2	3	1	1	2	4	2	5	7	3		7	2	5	7	7	2	2	3	70.5
470	Oilpalm_Independent_smallholder	3	6	4	2	5		5	2	1	1	3	3	1	1	4		7	0	1	1	7	3	1	4	58.5
471	Oilpalm_Independent_smallholder	3	3	1	1	4	1	6	1	2	1	2	2	7	1	1		7	1	7	1	7	2	1	1	62
472	Oilpalm_Independent_smallholder	3	1	1	1	5	1	6	1	1	1	2	1	7	2	1		7	1	7	2	7	1	1	1	59
473	Oilpalm_Independent_smallholder	3	4	4	2	3	1	4		3	6	3	1	3	2	4		7	1	3	2	7	1	6	4	59
474	Oilpalm_Independent_smallholder		3	4		3	3		2		2	3	4	5	3	4		7	3	5	3	5	4	2	4	70
475	Oilpalm_Independent_smallholder	2	4	5	2	7	3	3	3		5	2	1	3	3	3		7	3	3	3	7	1	5	3	65
476	Oilpalm_Independent_smallholder	3	2	1	1	5	1	5	1	2	1	1	1	1	1	1		7	1	1	1	7	1	1	1	52
477	Oilpalm_Independent_smallholder			5	3	6		5		3	5	3	2	3	4	4		7	0	3	4	7	2	5	4	61.5
478	Oilpalm_Independent_smallholder	3	3	2	1	2	1	6	1	1	1	2	2	2	1	1		7	1	2	1	7	2	1	1	57
479	Oilpalm_Independent_smallholder	3	2	1	1	6	1	6	1	1	7	1	1	7	1	1		7	1	7	1	7	1	7	1	61
480	Oilpalm_Independent_smallholder	3	2	1	1	6	1	6	1	1	1	1	1	1	1	1		7	1	1	1	7	1	1	1	52
481	Oilpalm_Independent_smallholder	3	7	7		6		7			4				3			7	0	0	3	7	0	4	0	47
482	Oilpalm_Independent_smallholder	3	2	1	1	5	1	6	1	2	2	2	2	7	2	1		7	1	7	2	7	2	2	1	63.5
483	Oilpalm_Independent_smallholder	3	1	1		6	1	7	5		7	5		6	2			7	1	6	2	7	0	7	0	56.5
484	Oilpalm_Independent_smallholder	3	2	3	1	2	2	7	1	1	2	2	3	3	2	2		7	2	3	2	7	3	2	2	67
485	Oilpalm_Independent_smallholder		3	2	3	2	1	7	2	2	3	2	2	4	2	3		7	1	4	2	7	2	3	3	62
486	Oilpalm_Independent_smallholder	3	5	2	3	3	3		1	1	2	1	1	4	3	2		7	3	4	3	3	1	2	2	48
487	Oilpalm_Independent_smallholder	3	1	5	5	3	4	3		3	4	3	1	3	2	5		7	4	3	2	7	1	4	5	67.5
488	Oilpalm_Independent_smallholder	3	5		4	5	0	0	2	2	1		1	5	4			7	0	5	4	4	1	1	0	43.5
489	Oilpalm_Independent_smallholder	2	2	3	0	1	2	1	0	0	0	0	1	0	0	0		6	2	0	0	1	1	0	0	26
490	Oilpalm_Independent_smallholder	3	2	3	0	1	2	1	0	0	0	0	1	0	0	0		6	2	0	0	1	1	0	0	26
491	Oilpalm_Independent_smallholder	3	5	3	4	4	5	4	2	2	2	2	3	5	4	4		7	5	5	4	7	3	2	4	81
492	Oilpalm_Independent_smallholder	2	5	5	2	3	2	3	0	0	3	1	3	3	3	3		7	2	3	3	4	3	3	3	57
493	Oilpalm_Independent_smallholder	3	5	1	0	2	1	0	0	2	0	2	0	1	0	0		7	1	1	0	4	0	0	0	34
494	Oilpalm_Independent_smallholder	3	2	3		3	0	0	0	4	0	0	0	4	0	0		7	0	4	0	4	0	0	0	34
495	Oilpalm_Independent_smallholder	2	4	1	0	1	2	0	0	2	0	0	2	0	1	0		6	2	0	1	2	2	0	0	35
496	Oilpalm_Independent_smallholder	2	3	5	0	6	0	6	2	0	0	3	2	1	0	4		7	0	1	0	7	2	0	4	53
497	Oilpalm_Independent_smallholder	2	4	1	0	2	0	0	2	0	0	1	0	0	0	0		7	0	0	0	3	0	0	0	26
498	Oilpalm_Independent_smallholder		4	3	0	4	0	2	0	0	0	2	2	4	2	2		7	0	4	2	4	2	0	2	45
499	Oilpalm_Independent_smallholder	3	2	2	2	2	0	0	0	0	0	1	1	1	1	1		7	0	1	1	1	1	0	1	24.5
500	Oilpalm_Independent_smallholder	3	6	3	3	5	2	7	3	3	6	3	3	6	3	2		7	2	6	3	7	3	6	2	73
501	Oilpalm_Control		3	7	3	4	0	7	3	2	7	0	0	7	0	0		7	0	7	0	7	0	7	0	52.5
502	Oilpalm_Control	3	1	1	0	1	0	1	0	1	0	0	0	0	0	0		3	0	0	0	2	0	0	0	14
503	Oilpalm_Control	3	3	4	0	3	0	7	0	2	0	2	0	0	3	0		7	0	0	3	7	0	0	0	45
504	Oilpalm_Control	4	5	3	1	4	2	6	0	1	0	0	0	1	2	3		7	2	1	2	7	0	0	3	52.5
505	Oilpalm_Control	3	6	3	3	4	3	4	3	4	2	3	3	2	4	2		7	3	2	4	7	3	2	2	71
506	Oilpalm_Control	3	4	2	0	0	0	4	4	3	0	0	0	0	0	0		6	0	0	0	7	0	0	0	40
507	Oilpalm_Control	3	6	2	0	5	0	5	3	2	0	4	0	0	0	2		7	0	0	0	7	0	0	2	43
508	Oilpalm_Control	3	6	2		2	1	1	1	1	1	1	0	0	0	1		7	1	0	0	4	0	1	1	34
509	Oilpalm_Control	3	7	3	2	4	0	5	6	4	0	2	0	0	1	0		7	0	0	1	7	0	0	0	43
510	Oilpalm_Control	3	6	4	0	5	0	2	3	4	0	0	0	0	0	5		7	0	0	0	7	0	0	5	44.5
511	Oilpalm_Control	3	7	5	0	3	0	0	3	0	3	0	0	3	3	0		7	0	3	3	3	0	3	0	33.5
512	Oilpalm_Control	3	5	2	2	2	2	0	0	0	5	0	0	4	0	0		7	2	4	0	0	0	5	0	26.5
513	Oilpalm_Control	3	5	5	2	0	3	0	2	0	3	0	0	3	3	0		7	3	3	3	2	0	3	0	38.5
514	Oilpalm_Control		6	6	3	3	2	0	0	1	3	2	1	3	3	0		7	2	3	3	3	1	3	0	43.5
515	Oilpalm_Control	3	0	7	0	5	2	0	0	0	3	3	1	3	3	3		7	2	3	3	3	1	3	3	45
516	Oilpalm_Control	2	3	3	3	0	1	0	0	0	2	0	3	3	3	0		7	1	3	3	0	3	2	0	36
517	Oilpalm_Control	3	5	3	0	4	0	3	3	3	2	0	0	0	0	0		7	0	0	0	7	0	2	0	43
518	Oilpalm_Control	3	6	1	3	7	7	0	0	0	0	3	0	0	0	0		7	7	0	0	3	0	0	0	47
519	Oilpalm_Control	3	6	3	2	5	4	0	2	2	3	1	1	3	1	0		7	4	3	1	5	1	3	0	55.5
520	Oilpalm_Control	3	7	3	2	5	3	0	4	2	3	2	2	4	2	3		7	3	4	2	7	2	3	3	68
521	Oilpalm_Control	3	5	4	0	7		0	4		5	0	0	5	4	0		7	0	5	4	4	0	5	0	41.5
522	Oilpalm_Control	3	7	5	4	6	3	0	2	3	3	2	0	4	5	0		7	3	4	5	7	0	3	0	61.5
523	Oilpalm_Control	3	0	0	0	5		0	0	0	0	0	0	0	0	0		5	0	0	0	0	0	0	0	10
524	Oilpalm_Control		6	5	4	6	4	3	4	5	4	2	3	6	5	0		7	4	6	5	7	3	4	0	79
525	Oilpalm_Control	3	1	1	0	4	0	0	0	2	1	3	0	0	0	0		6	0	0	0	5	0	1	0	32.5
526	Oilpalm_Control	2	1	5	0	0	0	3	2	0	0	2	2	1	0	0		6	0	1	0	7	2	0	0	49
527	Oilpalm_Control	3	3	1	1	6	1	6	1	1	1	1	1	7	1	1		7	1	7	1	7	1	1	1	58
528	Oilpalm_Control		2	3	1	3	1	7	1	2	1	2	2	1	1	0		7	1	1	1	7	2	1	0	55.5
529	Oilpalm_Control	3	2	1	1	5	1	6	1	2	1	2	1	7	2	0		7	1	7	2	7	1	1	0	58.5
530	Oilpalm_Control	3	5	2	1	4	0	4	0	1	3	0	0	3	3	0		7	0	3	3	5	0	3	0	41.5
531	Oilpalm_Control		3	1	1	5	1	5	1	2	2	2	1	7	3	1		7	1	7	3	7	1	2	1	60.5
532	Oilpalm_Control	3	4	3	0	3	1	7	0	2	3	1	0	4	3	5		7	1	4	3	7	0	3	5	56
533	Oilpalm_Control	3	3	4	2	4	2	6	2	1	2	0	0	3	1	4		7	2	3	1	7	0	2	4	55
534	Oilpalm_Control	3	3	2	0	2	0	5	1	1	2	0	0	1	1	2		7	0	1	1	7	0	2	2	46
535	Oilpalm_Control	3	3	4	0	2	2	7	3	2	4	0	0	0	0	3		7	2	0	0	7	0	4	3	51.5
536	Oilpalm_Control	3	4	2	2	1	2	6	2	3	1	2		4	2	3		7	2	4	2	7	0	1	3	56
537	Oilpalm_Control	3	4	4	3	4	3	7	2	6	2	3	1	5	6	4		7	3	5	6	7	1	2	4	69
538	Oilpalm_Control	3	7	2		7	1	2	7	6	0	0	0	0	0	0		7	1	0	0	7	0	0	0	45
539	Oilpalm_Control	4	4	5	2	6	3	7	0	0	2	0	0	4	3	2		7	3	4	3	7	0	2	2	60
540	Oilpalm_Control	3	3	4	3	1	3	3	5	3	4	5	0	1	2	4		7	3	1	2	7	0	4	4	58
541	Oilpalm_Control	3	4	1	0	5	1	2	3	2	4	0	0	1	0	0		7	1	1	0	7	0	4	0	48
542	Oilpalm_Control	5	1	2	2	1	2	2	2	2	2	2	2	2	2	0		6	2	2	2	7	2	2	0	59
543	Oilpalm_Control	3	4	4	3	4	3	2	3	2	2	3	1	0	0	0		7	3	0	0	7	1	2	0	56
544	Oilpalm_Control	3	4	4	2	3	4	2	5	4	4	3	0	4	0	0		7	4	4	0	7	0	4	0	60
545	Oilpalm_Control	3	4	4	2	3	4	2	5	4	4	3	4	6	0	0		7	4	6	0	7	4	4	0	78
546	Oilpalm_Control	3	5	4	3	4	3	2	2	2	3	2	2	2	0	0		7	3	2	0	7	2	3	0	62.5
547	Oilpalm_Control	3	5	3	3	4	2	2	2	2	2	2	1	4	0	0		7	2	4	0	7	1	2	0	57
548	Oilpalm_Control	3	5	4	2	3	4	2	2	2	2	1	1	6	0	0		7	4	6	0	7	1	2	0	65
549	Oilpalm_Control	3	5	4	3	4	2	2	2	2	2	0	0	0	0	0		7	2	0	0	6	0	2	0	45
550	Oilpalm_Control		6	3	4	2	2	2	2	2	2	2	2	1	4	0		7	2	1	4	7	2	2	0	62
551	Oilpalm_Control			4	2	7	3	2	1	4	7	2		7	1	0		7	3	7	1	7	0	7	0	62.5
552	Oilpalm_Control	3	3	2		7	3	2		2	7	2		7		0		7	3	7	0	6	0	7	0	57.5
553	Oilpalm_Control	3	5	3	3	5	6	2	4	4	3	1	3	1	3	0		7	6	1	3	7	3	3	0	77.5
554	Oilpalm_Control	3	2	5	1	7	3	7			5	2	1	2	7	0		7	3	2	7	7	1	5	0	66.5
555	Oilpalm_Control		4	3		3		7	2	1	7	2		7	1			7	0	7	1	7	0	7	0	53.5
556	Oilpalm_Control		6	3	4	6	3	4	2	3	4	2	3	4	6	2		7	3	4	6	7	3	4	2	76
557	Oilpalm_Control	3	4	2	2	2	2	2	6	3	2	4	3	2	3	3		7	2	2	3	7	3	2	3	67.5
558	Oilpalm_Control	3	6	2	1	4	6	4	4	3	2	1	4	3	1	0		7	6	3	1	7	4	2	0	81
559	Oilpalm_Control	3	4	7	7	7	0	0	0	0	0	0	0	0	0	0		7	0	0	0	0	0	0	0	14
560	Oilpalm_Control	3	1	2	2	6	3	2	3	4	3	2	3	1	1	3		7	3	1	1	7	3	3	3	68
561	Oilpalm_Control	3	4	5		5	1	7	1		7	2		4	4	6		7	1	4	4	7	0	7	6	59.5
562	Oilpalm_Control	3	5	2		6			2	2					2	3		7	0	0	2	4	0	0	3	33.5
563	Oilpalm_Control	3	6	4	2	5	1	4	1	1	2	1	1	2	2	2		7	1	2	2	7	1	2	2	55
564	Oilpalm_Control	3	3	4	2	7	3	7	2	2	7	2	2	7	2	2		7	3	7	2	7	2	7	2	72.5
565	Oilpalm_Control		7	5	3	7	4	7	3	3	7	2		7				7	4	7	0	7	0	7	0	64.5
566	Oilpalm_Control		4	4	3	4	2	7	2	2	3	4	3	5	2	3		7	2	5	2	7	3	3	3	70
567	Oilpalm_Control	3	5	4	2	3	4	7	2	2	2	1	1	6	5	6		7	4	6	5	7	1	2	6	73
568	Oilpalm_Control	3	1	2	2	6	2	2	6	3	2	4	5	3	3	2		7	2	3	3	7	5	2	2	76
569	Oilpalm_Control	3	6	1	3	4	5	6	4	6	4	2	1	4	3	6		7	5	4	3	7	1	4	6	73
570	Oilpalm_Control	3	4	2	2	3	2	3	2	3	2	2	2	3	2	2		7	2	3	2	7	2	2	2	63
571	Oilpalm_Control	3	1	2	2	1	3	4	2	3	4	2	4	1	2	3		6	3	1	2	7	4	4	3	71.5
572	Oilpalm_Control	2	7	6	7	5	2	3	2	2	0	0	0	0	0	0		7	2	0	0	7	0	0	0	48
573	Oilpalm_Control	2	7	6	7	5	1	1	1	1	0	0	0	1	0	0		7	1	1	0	3	0	0	0	30
574	Oilpalm_Control	2	6	6	7	6	1	1	1	1	0	0	0	2	0	0		7	1	2	0	3	0	0	0	31
575	Oilpalm_Control	3	7	6	7	6	1	2	3	4	0	0	2	0	0	0		7	1	0	0	7	2	0	0	53
576	Oilpalm_Control	3	6	6	7	6	4	3	2	1	0	0	0	0	0	1		7	4	0	0	6	0	0	1	50.5
577	Oilpalm_Control	3	6	4	7	6	1	1	1	1	0	0	0	0	0	0		7	1	0	0	3	0	0	0	29
578	Oilpalm_Control	3	6	4	7	6	1	1	1	1	1	0	0	0	0	0		7	1	0	0	3	0	1	0	29.5
579	Oilpalm_Control	3	6	4	7	6	0	0	0	0	0	0	0	0	0	1		7	0	0	0	0	0	0	1	14.5
580	Oilpalm_Control	3	6	4	7	6	0	0	0	0	0	1	0	0	0	0		7	0	0	0	1	0	0	0	18
581	Oilpalm_Control	3	6	3	7	6	0	0	0	0	1	0	0	0	0	0		7	0	0	0	0	0	1	0	14.5
582	Oilpalm_Control	3	6	4	7	6	0	0	0	0	1	0	0	1	1	0		7	0	1	1	0	0	1	0	16.5
583	Oilpalm_Control	3	6	5	7	6	0	0	0	0	0	0	0	1	0	1		7	0	1	0	0	0	0	1	15.5
584	Oilpalm_Control	3	6	6	7	7	0	0	1	0	1	0	0	0	0	0		7	0	0	0	1	0	1	0	18.5
585	Oilpalm_Control	2	6	2	7	7	0	0	1	0	0	0	0	0	0	1		7	0	0	0	1	0	0	1	18.5
586	Oilpalm_Control	2	6	3	7	7	0	0	0	0	1	0	0	0	0	1		7	0	0	0	0	0	1	1	15
587	Oilpalm_Control	2	7	6	7	7	0	0	0	0	1	0	0	0	0	0		7	0	0	0	0	0	1	0	14.5
588	Oilpalm_Control	2	6	6	7	2	0	0	0	0	1	0	0	0	0	1		7	0	0	0	0	0	1	1	15
589	Oilpalm_Control	2	5	6	7	3	0	0	1	0	0	0	1	0	0	0		7	0	0	0	1	1	0	0	22
590	Oilpalm_Control	2	5	6	7	3	0	0	0	0	0	0	0	0	0	1		7	0	0	0	0	0	0	1	14.5
591	Oilpalm_Control	2	5	6	7	3	0	0	0	0	2	0	0	0	2	1		7	0	0	2	0	0	2	1	17.5
592	Oilpalm_Control	2	5	7	7	4	0	0	1	0	0	0	0	0	0	1		7	0	0	0	1	0	0	1	18.5
593	Oilpalm_Control	2	7	7	7	4	0	0	0	0	0	0	0	0	0	0		7	0	0	0	0	0	0	0	14
594	Oilpalm_Control	2	7	7	7	4	1	1	0	0	3	0	0	0	0	0		7	1	0	0	1	0	3	0	22.5
595	Oilpalm_Control	3	7	7	7	4	0	0	0	0	0	0	0	1	0	0		7	0	1	0	0	0	0	0	15
596	Oilpalm_Control	3	7	7	7	2	0	0	0	0	0	0	0	0	0	0		7	0	0	0	0	0	0	0	14
597	Oilpalm_Control	3	7	6	7	2	1	1	0	0	0	0	0	0	0	1		7	1	0	0	1	0	0	1	21.5
598	Oilpalm_Control	3	7	6	7	2	0	1	0	0	3	0	0	0	0	0		7	0	0	0	1	0	3	0	19.5
599	Oilpalm_Control	3	7	6	7	2	0	1	1	0	0	0	0	0	0	0		7	0	0	0	2	0	0	0	22
600	Oilpalm_Control	3	7	6	7	2	1	1	1	0	1	1	1	1	1	1		7	1	1	1	3	1	1	1	36
601	Jatropha_PermanentWorker	2	2	3	2	0	0	0	7	2	5	0	0	4	2	6		7	0	4	2	7	0	5	6	53.5
602	Jatropha_PermanentWorker	3	1	2	0	1	0	7	0	0	5	0	0	4	0	5		4	0	4	0	7	0	5	5	45
603	Jatropha_PermanentWorker	3	6	7	7	7	7	7	7	7	5	3	2	4	2	7		7	7	4	2	7	2	5	7	83
604	Jatropha_PermanentWorker	2	7	4	5	7	4	7	0	4	5	2	0	5	1	7		7	4	5	1	7	0	5	7	66
605	Jatropha_PermanentWorker	3	7	2	7	7	4	7	3	4	7	2	1	3	4	7		7	4	3	4	7	1	7	7	72
606	Jatropha_PermanentWorker	3	3	1	7	3	3	5	2	1	3	2	2	2	0	7		7	3	2	0	7	2	3	7	66
607	Jatropha_PermanentWorker	3	7	7	7	7	2	7	0	0	5	0	0	5	3	7		7	2	5	3	7	0	5	7	62
608	Jatropha_PermanentWorker	3	5	3	4	3	5	7	0	0	4	0	0	7	0	7		7	5	7	0	7	0	4	7	69.5
609	Jatropha_PermanentWorker	3	7	3	3	7	1	7	5	0	7	1	2	6	1	7		7	1	6	1	7	2	7	7	67
610	Jatropha_PermanentWorker	2	7	3	3	7	2	7	0	0	7	3	0	3	5	2		7	2	3	5	7	0	7	2	60.5
611	Jatropha_PermanentWorker	2	3	1	2	1	2	2	1	3	1	2	3	2	3	2		7	2	2	3	7	3	1	2	66.5
612	Jatropha_PermanentWorker	3	3	2	3	5	1	7	2	4	4	4	3	4	4	7		7	1	4	4	7	3	4	7	70.5
613	Jatropha_PermanentWorker	2	6	2	1	3	0	7	0	0	0	0	0	0	0	2		7	0	0	0	7	0	0	2	43
614	Jatropha_PermanentWorker	3	2	5	6	3	2	7	2	1	2	3	2	2	3	5		7	2	2	3	7	2	2	5	64.5
615	Jatropha_PermanentWorker	2	5	2	0	1	1	6	1	1	0	1	1	0	1	1		7	1	0	1	7	1	0	1	50.5
616	Jatropha_PermanentWorker	3	2	2	0	2	1	5	1	2	0	1	1	0	0	1		6	1	0	0	7	1	0	1	47.5
617	Jatropha_PermanentWorker	3	5	2	1	2	1	4	1	1	0	1	0	0	1	1		7	1	0	1	7	0	0	1	46.5
618	Jatropha_PermanentWorker	3	7	3	2	3	3	7	3	0	7	2	3	7	3	2		7	3	7	3	7	3	7	2	77.5
619	Jatropha_PermanentWorker	3	2	3	3	4	5	7	3	1	4	2	1	5	3	3		7	5	5	3	7	1	4	3	72.5
620	Jatropha_PermanentWorker	3	6	5	2	6	2	7	0	0	0	0	0	3	3	6		7	2	3	3	7	0	0	6	57
621	Jatropha_PermanentWorker	3	6	3	5	6	1	7	1	3	3	0	0	6	1	2		7	1	6	1	7	0	3	2	54.5
622	Jatropha_PermanentWorker	3	7	3	3	3	2	7	0	0	3	0	0	0	2	5		7	2	0	2	7	0	3	5	54
623	Jatropha_PermanentWorker	3	7	3	0	1	3	7	0	1	3	0	0	1	1	7		7	3	1	1	7	0	3	7	58
624	Jatropha_PermanentWorker	3	7	1	0	3	2	7	0	3	3	0	0	3	0	5		7	2	3	0	7	0	3	5	55
625	Jatropha_PermanentWorker	2	7	7	0	3	3	7	0	2	2	5	2	7	5	7		7	3	7	5	7	2	2	7	75.5
626	Jatropha_PermanentWorker	2	3	7	0	3	0	7	2	5	2	0	0	7	0	7		7	0	7	0	7	0	2	7	53.5
627	Jatropha_PermanentWorker	2	7	0	0	2	1	7	0	4	3	0	0	3	0	7		7	1	3	0	7	0	3	7	53
628	Jatropha_PermanentWorker	2	0	5	0	7	0	7	0	5	2	0	0	6	0	7		7	0	6	0	7	0	2	7	52.5
629	Jatropha_PermanentWorker	3	7	5	4	7	3	7	2	5	2	7	0	7	2	7		7	3	7	2	7	0	2	7	64.5
630	Jatropha_PermanentWorker	3	7	3	4	5	4	7	4	4	4	7	3	4	4	7		7	4	4	4	7	3	4	7	79.5
631	Jatropha_PermanentWorker	3	7	4	4	3	4	7	4	3	5	3	2	4	2	6		7	4	4	2	7	2	5	6	73.5
632	Jatropha_PermanentWorker	3	7	4	3	4	3	7	4	4	5	2	2	4	2	7		7	3	4	2	7	2	5	7	71
633	Jatropha_PermanentWorker	3	7	4	2	4	2	7	4	4	3	2	2	4	5	7		7	2	4	5	7	2	3	7	70
634	Jatropha_PermanentWorker	3	7	5	4	7	3	7	2	5	2	7	0	7	2	7		7	3	7	2	7	0	2	7	64.5
635	Jatropha_PermanentWorker	1	5	0	0	0	0	7	1	0	5	2	0	0	0	0		5	0	0	0	7	0	5	0	40.5
636	Jatropha_PermanentWorker	3	5	3	7	7	2	7	1	1	3	1	7	1	4	1		7	2	1	4	7	7	3	1	83
637	Jatropha_PermanentWorker	3	7	5	1	7	1	7	5	1	1	1	1	1	3	6		7	1	1	3	7	1	1	6	56.5
638	Jatropha_PermanentWorker	3	1	5	2	5	2	2	5	1	4	0	0	0	4	0		7	2	0	4	7	0	4	0	54
639	Jatropha_PermanentWorker	3	3	3	1	3	1	5	0	0	0	1	1	0	0	1		7	1	0	0	6	1	0	1	45.5
640	Jatropha_PermanentWorker	3	6	5	3	5	5	7	0	3	3	1	0	1	0	5		7	5	1	0	7	0	3	5	62
641	Jatropha_PermanentWorker	3	3	3	2	2	3	7	2	0	3	2	0	6	0	3		7	3	6	0	7	0	3	3	60
642	Jatropha_PermanentWorker	3	4	3	2	3	3	7	0	3	3	0	0	5	0	5		7	3	5	0	7	0	3	5	60
643	Jatropha_PermanentWorker	3	1	3	2	7	0	7	3	3	3	1	0	6	3	6		7	0	6	3	7	0	3	6	55.5
644	Jatropha_PermanentWorker	2	7	5	4	7	6	7	1	1	0	1	1	0	7	5		7	6	0	7	7	1	0	5	73.5
645	Jatropha_PermanentWorker	2	7	6	5	2	7	7	4	1	1	1	0	1	7	5		7	7	1	7	7	0	1	5	74
646	Jatropha_PermanentWorker	3	7	3	2	3	2	7	3	2	1	2	0	3	0	7		7	2	3	0	7	0	1	7	55
647	Jatropha_PermanentWorker	2	7	3	0	2	5	7	2	2	1	0	0	3	0	7		7	5	3	0	7	0	1	7	64
648	Jatropha_PermanentWorker	2	7	3	2	4	3	7	3	2	1	2	0	3	3	7		7	3	3	3	7	0	1	7	61
649	Jatropha_PermanentWorker	2	5	0	0	3	0	7	0	3	1	0	0	2	2	7		7	0	2	2	7	0	1	7	50
650	Jatropha_PermanentWorker	2	7	7	4	7	3	7	3	7	4	4	4	4	4	7		7	3	4	4	7	4	4	7	80.5
651	Jatropha_PermanentWorker	2	7	4	4	5	4	7	3	6	6	3	5	5	5	7		7	4	5	5	7	5	6	7	90.5
652	Jatropha_PermanentWorker	2	7	4	5	7	4	7	4	4	3	1	0	4	0	2		7	4	4	0	7	0	3	2	60.5
653	Jatropha_PermanentWorker	3	7	5	4	7	4	7	4	5	5	0	0	0	0	7		7	4	0	0	7	0	5	7	60
654	Jatropha_PermanentWorker	3	7	4	4	4	5	7	3	4	5	1	2	2	2	1		7	5	2	2	7	2	5	1	72
655	Jatropha_PermanentWorker	3	3	2	1	2	3	7	0	2	7	0	0	6	1	3		7	3	6	1	7	0	7	3	63
656	Jatropha_PermanentWorker	3	7	4	6	7	4	7	1	0	0	2	0	0	3	7		7	4	0	3	7	0	0	7	60.5
657	Jatropha_PermanentWorker	3	5	3	5	3	0	7	2	0	1	0	0	2	0	7		7	0	2	0	7	0	1	7	48
658	Jatropha_PermanentWorker	3	5	3	2	3	1	7	0	2	2	0	0	6	3	5		7	1	6	3	7	0	2	5	57.5
659	Jatropha_PermanentWorker	3	5	3	7	2	0	7	3	2	0	0	0	3	1	7		7	0	3	1	7	0	0	7	49.5
660	Jatropha_PermanentWorker	3	3	2	1	3	1	7	0	2	2	0	0	3	1	3		7	1	3	1	7	0	2	3	51.5
661	Jatropha_PermanentWorker	3	5	3	7	4	1	7	1	2	2	0	0	3	2	7		7	1	3	2	7	0	2	7	54.5
662	Jatropha_PermanentWorker	3	5	1	3	3	1	7	0	2	3	0	0	2	1	3		7	1	2	1	7	0	3	3	51
663	Jatropha_PermanentWorker	3	5	3	3	4	0	7	3	2	2	0	0	5	0	7		7	0	5	0	7	0	2	7	51.5
664	Jatropha_PermanentWorker	3	3	2	1	2	0	7	0	1	2	0	0	3	0	2		7	0	3	0	7	0	2	2	47
665	Jatropha_PermanentWorker	3	7	2	1	0	0	7	0	3	3	0	0	5	1	0		7	0	5	1	7	0	3	0	49.5
666	Jatropha_PermanentWorker	3	2	2	1	1	0	3	1	1	0	1	0	0	0	1		6	0	0	0	6	0	0	1	36.5
667	Jatropha_PermanentWorker	3	3	2	1	1	0	5	1	1	1	1	1	1	1	1		7	0	1	1	7	1	1	1	49
668	Jatropha_PermanentWorker	3	2	2	1	1	0	4	0	1	1	1	0	0	1	1		6	0	0	1	6	0	1	1	38
669	Jatropha_PermanentWorker	3	2	1	0	2	1	3	1	1	0	1	0	1	0	1		5	1	1	0	6	0	0	1	38.5
670	Jatropha_PermanentWorker	2	7	4	4	5	2	4	1	4	3	3	2	4	2	4		7	2	4	2	7	2	3	4	65.5
671	Jatropha_PermanentWorker	3	7	5	5	4	2	7	3	3	2	2	2	3	2	7		7	2	3	2	7	2	2	7	65.5
672	Jatropha_PermanentWorker	3	7	5	4	5	4	7	4	5	5	2	1	4	4	5		7	4	4	4	7	1	5	5	71
673	Jatropha_PermanentWorker	3	6	3	2	3	1	1	0	1	3	0	0	6	1	3		7	1	6	1	2	0	3	3	35
674	Jatropha_PermanentWorker	2	7	2	1	7	6	7	2	4	1	3	1	4	1	3		7	6	4	1	7	1	1	3	71
675	Jatropha_PermanentWorker	3	7	4	2	6	2	7	3	4	3	2	1	2	4	3		7	2	2	4	7	1	3	3	61
676	Jatropha_PermanentWorker	3	7	3	2	6	4	7	4	3	4	2	1	4	2	3		7	4	4	2	7	1	4	3	67.5
677	Jatropha_PermanentWorker	3	7	4	2	7	4	7	2	1	3	2	1	4	3	4		7	4	4	3	7	1	3	4	68.5
678	Jatropha_PermanentWorker	3	7	4	6	4	5	7	2	3	2	3	1	2	2	4		7	5	2	2	7	1	2	4	68
679	Jatropha_PermanentWorker	3	5	3	2	6	1	7	0	1	2	0	0	2	0	6		7	1	2	0	7	0	2	6	51
680	Jatropha_PermanentWorker	3	3	2	1	7	2	7	0	1	2	0	0	3	0	3		7	2	3	0	7	0	2	3	53.5
681	Jatropha_PermanentWorker	3	6	2	1	6	1	7	0	1	3	0	0	3	0	2		7	1	3	0	7	0	3	2	50.5
682	Jatropha_PermanentWorker	3	3	7	2	1	1	7	0	0	3	0	0	5	0	3		7	1	5	0	7	0	3	3	53
683	Jatropha_PermanentWorker	3	7	3	2	7	7	7	1	1	1	5	3	2	2	7		7	7	2	2	7	3	1	7	83
684	Jatropha_PermanentWorker	3	7	5	5	6	5	5	1	1	2	0	0	0	2	7		7	5	0	2	7	0	2	7	63.5
685	Jatropha_PermanentWorker	2	7	5	1	7	7	7	0	0	0	0	0	0	4	0		7	7	0	4	7	0	0	0	67
686	Jatropha_PermanentWorker	2	7	5	4	2	4	7	1	1	1	0	0	1	2	0		7	4	1	2	7	0	1	0	57.5
687	Jatropha_PermanentWorker	3	7	5	2	7	6	7	1	1	1	3	0	0	2	4		7	6	0	2	7	0	1	4	64.5
688	Jatropha_PermanentWorker	3	5	2	1	3	2	2	0	1	0	1	0	0	1	1		7	2	0	1	4	0	0	1	37.5
689	Jatropha_PermanentWorker	3	2	4	3	4	0	6	0	2	0	0	0	5	0	7		7	0	5	0	7	0	0	7	50.5
690	Jatropha_PermanentWorker	2	5	0	0	3	2	2	0	0	1	0	0	7	0	5		7	2	7	0	2	0	1	5	38
691	Jatropha_PermanentWorker	3	2	0	0	4	2	3	0	0	1	0	0	6	0	5		6	2	6	0	3	0	1	5	39
692	Jatropha_PermanentWorker	3	3	0	0	3	2	5	0	0	2	0	0	6	0	5		6	2	6	0	5	0	2	5	47.5
693	Jatropha_PermanentWorker	3	2	0	0	5	2	5	0	0	2	0	0	6	0	5		7	2	6	0	5	0	2	5	49.5
694	Jatropha_PermanentWorker	2	3	0	0	4	3	3	0	0	2	0	0	5	0	3		7	3	5	0	3	0	2	3	42.5
695	Jatropha_PermanentWorker	3	7	7	7	4	0	0	0	0	0	0	0	1	0	0		7	0	1	0	0	0	0	0	15
696	Jatropha_PermanentWorker	3	7	7	7	2	0	0	0	0	0	0	0	0	0	0		7	0	0	0	0	0	0	0	14
697	Jatropha_PermanentWorker	3	7	6	7	2	1	1	0	0	0	0	0	0	0	1		7	1	0	0	1	0	0	1	21.5
698	Jatropha_PermanentWorker	3	7	6	7	2	0	1	0	0	3	0	0	0	0	0		7	0	0	0	1	0	3	0	19.5
699	Jatropha_PermanentWorker	3	7	6	7	2	0	1	1	0	0	0	0	0	0	0		7	0	0	0	2	0	0	0	22
700	Jatropha_PermanentWorker	3	7	6	7	2	1	1	1	0	1	1	1	1	1	1		7	1	1	1	3	1	1	1	36
701	Jatropha_SeasonalWorker	3	5	2	7	0	1	7	2	1	7	1	0	0	6	7		7	1	0	6	7	0	7	7	58
702	Jatropha_SeasonalWorker	3	5	4	7	4	0	6	4	2	5	3	0	4	2	7		7	0	4	2	7	0	5	7	54
703	Jatropha_SeasonalWorker	2	3	2	0	3	2	7	0	0	6	2	0	2	0	7		7	2	2	0	7	0	6	7	56.5
704	Jatropha_SeasonalWorker	3	3	2	3	4	0	7	2	0	5	0	0	3	0	7		7	0	3	0	7	0	5	7	51
705	Jatropha_SeasonalWorker	2	7	2	1	3	3	7	2	1	2	2	1	1	1	6		7	3	1	1	7	1	2	6	61
706	Jatropha_SeasonalWorker	3	4	3	2	4	3	7	5	4	6	3	1	6	2	3		7	3	6	2	7	1	6	3	67.5
707	Jatropha_SeasonalWorker	2	7	3	2	3	0	2	0	0	3	0	0	3	0	5		7	0	3	0	2	0	3	5	29
708	Jatropha_SeasonalWorker	3	3	1	1	3	1	7	1	3	2	0	2	3	0	7		7	1	3	0	7	2	2	7	60.5
709	Jatropha_SeasonalWorker	2	7	1	3	2	7	5	0	0	1	0	0	5	0	7		7	7	5	0	5	0	1	7	64
710	Jatropha_SeasonalWorker	3	1	2	0	1	1	1	1	1	1	0	0	1	1	1		4	1	1	1	3	0	1	1	26
711	Jatropha_SeasonalWorker	3	7	3	4	5	4	7	0	0	5	7	5	0	7	2		7	4	0	7	7	5	5	2	84.5
712	Jatropha_SeasonalWorker	3	7	5	1	7	1	7	1	0	1	0	0	0	5	0		7	1	0	5	7	0	1	0	50.5
713	Jatropha_SeasonalWorker	3	7	6	5	7	2	7	0	0	1	0	0	2	3	5		7	2	2	3	7	0	1	5	56
714	Jatropha_SeasonalWorker	2	7	6	2	5	4	7	0	0	1	0	0	0	5	4		7	4	0	5	7	0	1	4	61.5
715	Jatropha_SeasonalWorker	3	7	5	3	6	2	7	2	1	1	1	0	1	2	1		7	2	1	2	7	0	1	1	52
716	Jatropha_SeasonalWorker	2	5	2	3	7	4	7	1	0	1	0	0	0	7	0		7	4	0	7	7	0	1	0	61.5
717	Jatropha_SeasonalWorker	3	3	1	1	7	1	7	2	1	2	1	1	1	1	1		7	1	1	1	7	1	2	1	52.5
718	Jatropha_SeasonalWorker	3	6	3	1	1	1	4	0	1	1	1	1	1	1	1		7	1	1	1	6	1	1	1	48
719	Jatropha_SeasonalWorker	3	3	0	1	0	1	1	0	1	0	0	0	0	0	1		4	1	0	0	2	0	0	1	19.5
720	Jatropha_SeasonalWorker	3	7	3	2	5	2	7	3	2	3	0	0	6	2	3		7	2	6	2	7	0	3	3	59
721	Jatropha_SeasonalWorker	2	7	6	4	2	4	7	2	0	0	4	0	0	5	5		7	4	0	5	7	0	0	5	61.5
722	Jatropha_SeasonalWorker	3	7	5	3	7	4	7	1	1	1	7	5	0	5	7		7	4	0	5	7	5	1	7	83
723	Jatropha_SeasonalWorker	3	7	5	0	2	3	7	2	0	2	1	0	2	1	7		7	3	2	1	7	0	2	7	58.5
724	Jatropha_SeasonalWorker	3	5	3	1	3	1	4	0	1	1	0	1	1	1	2		7	1	1	1	5	1	1	2	44.5
725	Jatropha_SeasonalWorker	3	2	3	1	1	2	4	1	0	0	0	0	0	0	1		7	2	0	0	5	0	0	1	40.5
726	Jatropha_SeasonalWorker	3	3	2	1	2	1	2	1	0	1	1	0	1	1	1		7	1	1	1	4	0	1	1	36
727	Jatropha_SeasonalWorker	3	3	2	0	2	0	3	0	1	0	0	0	0	0	1		7	0	0	0	4	0	0	1	30.5
728	Jatropha_SeasonalWorker	3	4	1	2	2	1	7	0	0	5	1	0	3	0	6		7	1	3	0	7	0	5	6	53.5
729	Jatropha_SeasonalWorker	3	5	3	2	2	2	7	0	3	1	0	0	3	0	6		7	2	3	0	7	0	1	6	54.5
730	Jatropha_SeasonalWorker	3	3	2	2	1	2	7	0	7	3	0	0	6	2	7		7	2	6	2	7	0	3	7	61
731	Jatropha_SeasonalWorker	3	4	3	2	6	0	7	0	4	0	0	0	3	3	3		7	0	3	3	7	0	0	3	49.5
732	Jatropha_SeasonalWorker	3	4	3	0	3	1	7	0	2	3	1	0	4	3	5		7	1	4	3	7	0	3	5	56
733	Jatropha_SeasonalWorker	3	6	5	7	6	0	0	0	0	0	0	0	1	0	1		7	0	1	0	0	0	0	1	15.5
734	Jatropha_SeasonalWorker	3	6	6	7	7	0	0	1	0	1	0	0	0	0	0		7	0	0	0	1	0	1	0	18.5
735	Jatropha_SeasonalWorker	2	6	2	7	7	0	0	1	0	0	0	0	0	0	1		7	0	0	0	1	0	0	1	18.5
736	Jatropha_SeasonalWorker	2	6	3	7	7	0	0	0	0	1	0	0	0	0	1		7	0	0	0	0	0	1	1	15
737	Jatropha_SeasonalWorker	2	7	6	7	7	0	0	0	0	1	0	0	0	0	0		7	0	0	0	0	0	1	0	14.5
738	Jatropha_SeasonalWorker	2	6	6	7	2	0	0	0	0	1	0	0	0	0	1		7	0	0	0	0	0	1	1	15
739	Jatropha_SeasonalWorker	2	5	6	7	3	0	0	1	0	0	0	1	0	0	0		7	0	0	0	1	1	0	0	22
740	Jatropha_SeasonalWorker	2	5	6	7	3	0	0	0	0	0	0	0	0	0	1		7	0	0	0	0	0	0	1	14.5
741	Jatropha_SeasonalWorker	2	5	6	7	3	0	0	0	0	2	0	0	0	2	1		7	0	0	2	0	0	2	1	17.5
742	Jatropha_SeasonalWorker	2	5	7	7	4	0	0	1	0	0	0	0	0	0	1		7	0	0	0	1	0	0	1	18.5
743	Jatropha_SeasonalWorker	2	7	7	7	4	0	0	0	0	0	0	0	0	0	0		7	0	0	0	0	0	0	0	14
744	Jatropha_SeasonalWorker	2	7	7	7	4	1	1	0	0	3	0	0	0	0	0		7	1	0	0	1	0	3	0	22.5
745	Jatropha_SeasonalWorker	3	7	7	7	4	0	0	0	0	0	0	0	1	0	0		7	0	1	0	0	0	0	0	15
746	Jatropha_SeasonalWorker	3	7	7	7	2	0	0	0	0	0	0	0	0	0	0		7	0	0	0	0	0	0	0	14
747	Jatropha_SeasonalWorker	3	7	6	7	2	1	1	0	0	0	0	0	0	0	1		7	1	0	0	1	0	0	1	21.5
748	Jatropha_SeasonalWorker	3	7	6	7	2	0	1	0	0	3	0	0	0	0	0		7	0	0	0	1	0	3	0	19.5
749	Jatropha_SeasonalWorker	3	7	6	7	2	0	1	1	0	0	0	0	0	0	0		7	0	0	0	2	0	0	0	22
750	Jatropha_SeasonalWorker	3	7	6	7	2	1	1	1	0	1	1	1	1	1	1		7	1	1	1	3	1	1	1	36
751	Jatropha_Control	2	1	2	3	3	1	6	4	0	3	1	0	0	1	3		7	1	0	1	7	0	3	3	49
752	Jatropha_Control	3	6	1	0	2	1	3	6	0	7	0	0	6	0	7		7	1	6	0	7	0	7	7	58
753	Jatropha_Control	3	7	1	0	7	1	0	0	7	7	0	0	7	0	7		7	1	7	0	7	0	7	7	59
754	Jatropha_Control	3	3	0	1	7	3	4	2	2	4	0	0	2	2	1		7	3	2	2	7	0	4	1	57.5
755	Jatropha_Control	3	4	2	7	7	3	7	0	0	3	2	0	2	3	3		7	3	2	3	7	0	3	3	59
756	Jatropha_Control	3	7	7	7	7	7	7	3	3	6	2	0	7	0	7		7	7	7	0	7	0	6	7	76.5
757	Jatropha_Control	3	7	4	4	6	4	7	4	5	7	0	0	4	0	3		7	4	4	0	7	0	7	3	63
758	Jatropha_Control	3	3	0	0	6	0	6	0	0	7	0	0	4	0	5		7	0	4	0	6	0	7	5	48
759	Jatropha_Control	3	7	2	0	0	0	2	0	0	7	0	0	0	0	4		7	0	0	0	2	0	7	4	27.5
760	Jatropha_Control	2	7	7	7	7	7	7	5	4	5	6	7	6	4	7		7	7	6	4	7	7	5	7	107
761	Jatropha_Control	2	7	2	2	7	3	7	5	4	7	3	2	2	2	6		7	3	2	2	7	2	7	6	69.5
762	Jatropha_Control	2	7	4	3	3	3	7	5	4	7	0	0	7	4	7		7	3	7	4	7	0	7	7	69
763	Jatropha_Control	3	3	1	2	1	2	7	4	4	7	0	1	7	0	7		7	2	7	0	7	1	7	7	66
764	Jatropha_Control	2	7	1	2	7	4	7	3	3	4	1	0	4	0	4		7	4	4	0	7	0	4	4	62
765	Jatropha_Control	2	7	2	3	2	4	7	4	4	7	3	3	7	2	7		7	4	7	2	7	3	7	7	82
766	Jatropha_Control	3	5	2	3	2	1	7	0	0	0	1	0	0	1	7		7	1	0	1	7	0	0	7	49.5
767	Jatropha_Control	3	7	1	0	0	0	7	0	0	0	0	0	0	0	5		7	0	0	0	7	0	0	5	44.5
768	Jatropha_Control	3	3	1	0	4	1	7	0	1	0	1	0	0	0	3		7	1	0	0	7	0	0	3	46.5
769	Jatropha_Control	3	3	1	0	1	1	5	1	1	4	1	0	5	2	2		5	1	5	2	7	0	4	2	51
770	Jatropha_Control	3	6	1	1	1	5	6	2	1	2	1	0	1	1	7		7	5	1	1	7	0	2	7	63.5
771	Jatropha_Control	3	5	2	1	6	1	4	2	1	0	0	1	1	1	1		7	1	1	1	7	1	0	1	51.5
772	Jatropha_Control	3	3	2	0	4	2	7	2	1	1	1	0	0	1	2		7	2	0	1	7	0	1	2	50.5
773	Jatropha_Control	3	4	3	2	5	3	7	3	3	7	2	1	5	2	7		7	3	5	2	7	1	7	7	69
774	Jatropha_Control	3	3	2	2	4	3	7	2	1	6	2	1	6	2	2		7	3	6	2	7	1	6	2	67
775	Jatropha_Control	3	6	3	2	3	3	7	3	2	5	2	1	3	1	1		7	3	3	1	7	1	5	1	62
776	Jatropha_Control	3	6	2	3	1	2	7	2	0	6	0	0	5	0	4		7	2	5	0	7	0	6	4	58
777	Jatropha_Control	3	6	3	2	0	2	7	0	2	5	0	0	4	0	4		7	2	4	0	7	0	5	4	56.5
778	Jatropha_Control	3	7	2	3	3	2	7	0	1	4	0	0	2	0	4		7	2	2	0	7	0	4	4	54
779	Jatropha_Control	3	7	3	2	1	4	7	0	2	3	0	0	5	3	4		7	4	5	3	7	0	3	4	65.5
780	Jatropha_Control	3	7	3	7	4	4	7	0	0	7	0	0	5	3	7		7	4	5	3	7	0	7	7	69
781	Jatropha_Control	3	7	3	7	4	2	7	3	2	7	2	1	7	3	7		7	2	7	3	7	1	7	7	69
782	Jatropha_Control	3	4	6	7	3	0	7	0	1	7	0	3	4	0	7		7	0	4	0	7	3	7	7	65
783	Jatropha_Control	3	7	0	2	2	0	2	0	0	1	0	0	3	0	5		7	0	3	0	2	0	1	5	28
784	Jatropha_Control	3	7	5	4	7	3	7	5	4	4	0	0	4	4	4		7	3	4	4	7	0	4	4	63
785	Jatropha_Control	3	7	4	3	4	2	7	4	4	2	2	1	2	0	6		7	2	2	0	7	1	2	6	58
786	Jatropha_Control	3	7	2	3	4	3	7	4	3	4	2	3	5	6	7		7	3	5	6	7	3	4	7	79.5
787	Jatropha_Control	3	7	5	4	6	4	7	4	4	4	3	4	4	5	7		7	4	4	5	7	4	4	7	84.5
788	Jatropha_Control	3	7	3	4	4	4	7	3	3	4	2	2	2	4	4		7	4	2	4	7	2	4	4	72
789	Jatropha_Control	3	7	4	3	5	4	7	4	5	4	2	5	4	2	4		7	4	4	2	7	5	4	4	84
790	Jatropha_Control	2	3	2	0	2	0	7	0	0	3	0	0	3	0	7		7	0	3	0	7	0	3	7	50
791	Jatropha_Control	3	7	0	5	3	0	7	1	3	2	0	0	3	0	7		7	0	3	0	7	0	2	7	49.5
792	Jatropha_Control	2	7	4	5	3	7	7	3	7	2	4	0	7	2	7		7	7	7	2	7	0	2	7	76.5
793	Jatropha_Control	3	3	2	7	3	0	7	2	0	2	3	1	0	5	7		7	0	0	5	7	1	2	7	55.5
794	Jatropha_Control	3	5	0	1	7	7	7	0	0	7	0	0	0	3	5		7	7	0	3	7	0	7	5	72
795	Jatropha_Control	3	3	2	7	7	1	7	1	1	7	3	1	7	3	7		7	1	7	3	7	1	7	7	66
796	Jatropha_Control	3	6	3	2	7	1	7	1	1	2	1	1	1	4	1		7	1	1	4	7	1	2	1	55.5
797	Jatropha_Control	3	3	2	1	5	1	2	3	5	3	1	1	1	3	2		7	1	1	3	7	1	3	2	55.5
798	Jatropha_Control	2	3	1	7	5	3	7	4	3	5	1	0	7	2	7		7	3	7	2	7	0	5	7	66
799	Jatropha_Control	3	3	5	2	7	2	7	6	2	5	2	0	1	1	5		7	2	1	1	7	0	5	5	55
800	Jatropha_Control	3	3	7	2	7	5	4	6	6	3	1	2	1	5	3		7	5	1	5	7	2	3	3	74
801	Jatropha_Control	3	3	7	2	7	3	7	1	0	2	1	0	0	0	7		7	3	0	0	7	0	2	7	55.5
802	Jatropha_Control	3	7	3	5	7	5	7	2	2	1	2	0	0	3	0		7	5	0	3	7	0	1	0	60.5
803	Jatropha_Control	2	7	5	3	7	2	7	1	1	1	0	0	2	3	7		7	2	2	3	7	0	1	7	57
804	Jatropha_Control	3	7	2	2	7	5	7	1	1	7	0	0	0	3	7		7	5	0	3	7	0	7	7	67
805	Jatropha_Control	3	7	2	1	5	1	7	1	1	0	0	0	2	2	7		7	1	2	2	7	0	0	7	52.5
806	Jatropha_Control	3	3	2	5	4	3	7	2	3	3	3	0	5	0	5		7	3	5	0	7	0	3	5	60
807	Jatropha_Control	3	1	5	1	7	4	4	4	1	5	1	0	0	5	5		7	4	0	5	7	0	5	5	64
808	Jatropha_Control	3	7	5	4	6	5	7	0	3	2	0	2	1	2	5		7	5	1	2	7	2	2	5	71.5
809	Jatropha_Control	3	7	6	3	7	4	7	1	1	4	1	0	0	2	5		7	4	0	2	7	0	4	5	60.5
810	Jatropha_Control	3	7	1	1	7	2	7	1	1	1	0	0	0	2	7		7	2	0	2	7	0	1	7	54
811	Jatropha_Control	4	7	1	1	1	1	7	1	1	5	7	0	0	0	0		7	1	0	0	7	0	5	0	47.5
812	Jatropha_Control	3	7	2	1	7	5	7	1	1	5	0	0	0	4	5		7	5	0	4	7	0	5	5	66
813	Jatropha_Control	3	6	2	2	5	2	7	1	2	1	2	1	2	1	3		7	2	2	1	7	1	1	3	57
814	Jatropha_Control	3	4	3	1	2	1	6	1	1	0	0	0	1	1	2		7	1	1	1	7	0	0	2	48
815	Jatropha_Control	3	5	1	1	3	1	7	0	0	2	1	1	0	1	2		7	1	0	1	7	1	2	2	52
816	Jatropha_Control	3	4	3	1	2	1	7	1	0	1	1	0	1	1	2		7	1	1	1	7	0	1	2	48.5
817	Jatropha_Control	3	4	2	1	3	1	6	1	2	1	1	0	1	1	2		7	1	1	1	7	0	1	2	48.5
818	Jatropha_Control	3	3	3	1	3	1	5	1	2	0	0	0	1	0	2		7	1	1	0	7	0	0	2	47
819	Jatropha_Control	3	2	1	1	2	3	5	1	1	0	1	1	0	1	1		6	3	0	1	7	1	0	1	54.5
820	Jatropha_Control	3	3	2	0	4	0	7	1	1	0	0	0	0	1	2		7	0	0	1	7	0	0	2	44
821	Jatropha_Control	3	6	3	2	4	2	7	2	1	3	0	0	5	1	3		7	2	5	1	7	0	3	3	57
822	Jatropha_Control	3	2	2	0	3	0	2	1	1	0	1	0	0	1	1		7	0	0	1	5	0	0	1	35.5
823	Jatropha_Control	3	5	3	2	5	2	7	2	3	4	2	0	5	2	5		7	2	5	2	7	0	4	5	59.5
824	Jatropha_Control	3	3	2	1	5	1	7	1	1	1	1	0	2	1	3		7	1	2	1	7	0	1	3	50
825	Jatropha_Control	3	6	5	3	5	3	7	0	2	4	1	0	5	2	5		7	3	5	2	7	0	4	5	62.5
826	Jatropha_Control	3	6	3	7	3	1	6	1	1	1	1	1	3	1	3		7	1	3	1	7	1	1	3	55
827	Jatropha_Control	3	2	1	1	4	1	2	1	2	0	1	1	1	0	1		7	1	1	0	6	1	0	1	46.5
828	Jatropha_Control	3	6	5	4	7	1	7	2	1	3	2	0	5	2	4		7	1	5	2	7	0	3	4	55.5
829	Jatropha_Control	3	5	3	2	5	3	7	1	2	3	1	0	6	1	3		7	3	6	1	7	0	3	3	61
830	Jatropha_Control	3	5	3	2	5	1	7	2	1	5	1	0	3	0	3		7	1	3	0	7	0	5	3	52
831	Jatropha_Control	3	3	4	2	6	2	7	1	0	3	0	0	5	1	2		7	2	5	1	7	0	3	2	56.5
832	Jatropha_Control	3	7	2	3	5	1	7	2	5	2	0	0	3	4	7		7	1	3	4	7	0	2	7	56.5
833	Jatropha_Control	2	7	5	3	7	7	7	1	1	0	0	0	1	7	7		7	7	1	7	7	0	0	7	74.5
834	Jatropha_Control	3	7	2	2	7	4	5	1	1	3	0	0	0	7	7		7	4	0	7	7	0	3	7	66
835	Jatropha_Control	3	7	5	4	1	1	7	4	1	1	0	0	0	5	7		7	1	0	5	7	0	1	7	54
836	Jatropha_Control	3	7	4	2	2	4	7	1	1	1	0	0	0	4	5		7	4	0	4	7	0	1	5	61
837	Jatropha_Control	3	7	3	6	7	3	7	1	1	1	1	0	1	5	7		7	3	1	5	7	0	1	7	61
838	Jatropha_Control	3	7	4	4	3	5	7	3	4	6	2	1	5	1	5		7	5	5	1	7	1	6	5	72.5
839	Jatropha_Control	3	7	5	5	7	3	7	2	4	5	3	2	4	2	5		7	3	4	2	7	2	5	5	70
840	Jatropha_Control	3	7	3	2	5	5	7	4	5	5	1	1	3	2	5		7	5	3	2	7	1	5	5	71
841	Jatropha_Control	3	7	4	5	2	2	7	5	4	2	5	3	7	2	5		7	2	7	2	7	3	2	5	72.5
842	Jatropha_Control	3	7	1	2	6	1	7	2	4	2	1	1	5	4	4		7	1	5	4	7	1	2	4	61
843	Jatropha_Control	3	7	2	2	3	4	7	4	2	5	2	1	3	4	6		7	4	3	4	7	1	5	6	70.5
844	Jatropha_Control	3	7	4	5	7	5	7	4	4	3	4	1	2	2	5		7	5	2	2	7	1	3	5	69
845	Jatropha_Control	3	7	5	1	5	0	7	2	3	1	0	0	3	0	3		7	0	3	0	7	0	1	3	47
846	Jatropha_Control	3	5	6	1	6	1	7	0	2	2	2	0	0	0	3		7	1	0	0	7	0	2	3	47.5
847	Jatropha_Control	4	7	6	2	7	5	7	2	1	2	1	4	3	5	7		7	5	3	5	7	4	2	7	85.5
848	Jatropha_Control	3	6	3	1	6	2	4	2	1	0	1	0	1	1	1		7	2	1	1	7	0	0	1	50.5
849	Jatropha_Control	3	5	1	1	5	1	4	1	1	0	1	0	1	0	1		7	1	1	0	7	0	0	1	46.5
850	Jatropha_Control	3	3	2	0	4	1	4	1	2	0	1	0	0	0	1		7	1	0	0	7	0	0	1	45.5

## Sheet: Subjective Wellbeing
ID	Observation	Statisfaction	Worthwhile	Happiness	Anxious
1	Sugarcane_grower	3	2	3	3
2	Sugarcane_grower	1	2	1	2
3	Sugarcane_grower	2	2	2	2
4	Sugarcane_grower	3	3	3	3
5	Sugarcane_grower	2	3	2	1
6	Sugarcane_grower	1	1	1	4
7	Sugarcane_grower	1	1	2	4
8	Sugarcane_grower	2	2	2	3
9	Sugarcane_grower	2	1	2	3
10	Sugarcane_grower	1	2	2	3
11	Sugarcane_grower	1	2	2	3
12	Sugarcane_grower	1	2	2	3
13	Sugarcane_grower	4	4	2	1
14	Sugarcane_grower	2	2	2	2
15	Sugarcane_grower	2	2	2	2
16	Sugarcane_grower	2	2	2	3
17	Sugarcane_grower	3	3	3	3
18	Sugarcane_grower	3	3	3	1
19	Sugarcane_grower	4	4	4	2
20	Sugarcane_grower	1	2	3	2
21	Sugarcane_grower	3	3	3	3
22	Sugarcane_grower	2	2	2	2
23	Sugarcane_grower	2	2	2	2
24	Sugarcane_grower	3	2	2	2
25	Sugarcane_grower	1	2	3	2
26	Sugarcane_grower	2	2	2	3
27	Sugarcane_grower	1	2	3	4
28	Sugarcane_grower	2	3	2	3
29	Sugarcane_grower	1	3	3	1
30	Sugarcane_grower	2	3	2	2
31	Sugarcane_grower	1	2	2	1
32	Sugarcane_grower	2	3	2	1
33	Sugarcane_grower	2	2	1	3
34	Sugarcane_grower	2	2	2	2
35	Sugarcane_grower	2	3	3	3
36	Sugarcane_grower	2	4	3	3
37	Sugarcane_grower	3	4	3	2
38	Sugarcane_grower	3	4	3	3
39	Sugarcane_grower	3	4	2	2
40	Sugarcane_grower	4	4	2	3
41	Sugarcane_grower	4	4	2	4
42	Sugarcane_grower	3	2	3	3
43	Sugarcane_grower	3	3	3	1
44	Sugarcane_grower	3	3	3	4
45	Sugarcane_grower	3	3	2	4
46	Sugarcane_grower	2	4	3	3
47	Sugarcane_grower	2	4	3	2
48	Sugarcane_grower	2	3	2	3
49	Sugarcane_grower	2	2	3	2
50	Sugarcane_grower	2	2	2	3
51	Sugarcane_grower	3	2	3	2
52	Sugarcane_grower	3	3	1	3
53	Sugarcane_grower	3	2	2	2
54	Sugarcane_grower	3	3	2	3
55	Sugarcane_grower	3	2	1	2
56	Sugarcane_grower	1	3	2	3
57	Sugarcane_grower	2	2	1	2
58	Sugarcane_grower	1	3	2	3
59	Sugarcane_grower	1	2	1	4
60	Sugarcane_grower	2	2	2	2
61	Sugarcane_grower	1	3	1	3
62	Sugarcane_grower	2	3	1	4
63	Sugarcane_grower	1	4	3	2
64	Sugarcane_grower	2	3	3	3
65	Sugarcane_grower	3	2	3	4
66	Sugarcane_grower	2	2	3	2
67	Sugarcane_grower	1	3	4	3
68	Sugarcane_grower	2	1	3	4
69	Sugarcane_grower	3	2	4	2
70	Sugarcane_grower	2	3	3	3
71	Sugarcane_grower	1	3	4	4
72	Sugarcane_grower	1	3	2	2
73	Sugarcane_grower	2	3	4	3
74	Sugarcane_grower	3	4	3	4
75	Sugarcane_grower	2	3	4	2
76	Sugarcane_grower	2	4	2	3
77	Sugarcane_grower	1	3	3	4
78	Sugarcane_grower	1	2	4	2
79	Sugarcane_grower	1	2	2	1
80	Sugarcane_grower	1	3	3	2
81	Sugarcane_grower	1	3	4	3
82	Sugarcane_grower	2	2	1	4
83	Sugarcane_grower	3	3	4	2
84	Sugarcane_grower	2	2	3	3
85	Sugarcane_grower	1	3	2	4
86	Sugarcane_grower	1	2	3	3
87	Sugarcane_grower	1	3	1	2
88	Sugarcane_grower	1	2	2	1
89	Sugarcane_grower	2	3	3	2
90	Sugarcane_grower	2	2	4	3
91	Sugarcane_grower	2	3	3	4
92	Sugarcane_grower	2	2	2	2
93	Sugarcane_grower	2	3	1	3
94	Sugarcane_grower	2	2	4	1
95	Sugarcane_grower	2	1	3	2
96	Sugarcane_grower	3	1	3	3
97	Sugarcane_grower	3	1	3	2
98	Sugarcane_grower	4	1	2	4
99	Sugarcane_grower	4	1	1	3
100	Sugarcane_grower	4	1	1	2
101	Sugarcane_control	3	4	4	1
102	Sugarcane_control	4	1	3	2
103	Sugarcane_control	3	4	2	3
104	Sugarcane_control	2	1	1	2
105	Sugarcane_control	3	4	1	4
106	Sugarcane_control	4	3	2	3
107	Sugarcane_control	3	2	3	2
108	Sugarcane_control	4	4	4	1
109	Sugarcane_control	3	2	3	2
110	Sugarcane_control	4	3	2	3
111	Sugarcane_control	3	4	1	2
112	Sugarcane_control	4	2	2	3
113	Sugarcane_control	3	1	3	3
114	Sugarcane_control	4	2	4	3
115	Sugarcane_control	3	3	4	3
116	Sugarcane_control	4	4	4	3
117	Sugarcane_control	3	3	4	2
118	Sugarcane_control	4	2	3	2
119	Sugarcane_control	3	1	2	2
120	Sugarcane_control	2	2	3	2
121	Sugarcane_control	3	2	2	1
122	Sugarcane_control	4	3	3	1
123	Sugarcane_control	4	4	2	1
124	Sugarcane_control	4	2	4	1
125	Sugarcane_control	4	1	2	2
126	Sugarcane_control	3	3	4	3
127	Sugarcane_control	3	4	2	2
128	Sugarcane_control	2	3	2	3
129	Sugarcane_control	3	2	1	3
130	Sugarcane_control	1	1	2	3
131	Sugarcane_control	1	2	2	3
132	Sugarcane_control	1	3	3	2
133	Sugarcane_control	1	4	2	3
134	Sugarcane_control	1	3	3	2
135	Sugarcane_control	2	2	3	3
136	Sugarcane_control	1	1	1	2
137	Sugarcane_control	2	2	1	3
138	Sugarcane_control	3	3	2	4
139	Sugarcane_control	1	2	3	2
140	Sugarcane_control	4	1	4	3
141	Sugarcane_control	3	2	2	3
142	Sugarcane_control	4	3	3	2
143	Sugarcane_control	3	4	4	1
144	Sugarcane_control	3	2	4	2
145	Sugarcane_control	3	1	2	3
146	Sugarcane_control	3	2	3	2
147	Sugarcane_control	3	3	2	3
148	Sugarcane_control	2	3	1	2
149	Sugarcane_control	3	2	2	3
150	Sugarcane_control	4	4	3	2
151	Sugarcane_control	3	3	3	3
152	Sugarcane_control	2	2	1	2
153	Sugarcane_control	4	2	2	1
154	Sugarcane_control	2	1	3	2
155	Sugarcane_control	4	2	3	3
156	Sugarcane_control	2	3	2	2
157	Sugarcane_control	4	3	1	3
158	Sugarcane_control	3	4	3	2
159	Sugarcane_control	3	4	2	2
160	Sugarcane_control	2	4	1	3
161	Sugarcane_control	3	3	3	3
162	Sugarcane_control	4	3	2	3
163	Sugarcane_control	3	3	1	3
164	Sugarcane_control	4	2	3	3
165	Sugarcane_control	3	3	1	2
166	Sugarcane_control	2	4	3	2
167	Sugarcane_control	2	3	1	2
168	Sugarcane_control	3	2	3	2
169	Sugarcane_control	3	3	2	1
170	Sugarcane_control	3	3	3	1
171	Sugarcane_control	4	3	2	2
172	Sugarcane_control	3	3	2	1
173	Sugarcane_control	4	3	1	2
174	Sugarcane_control	3	2	3	1
175	Sugarcane_control	4	2	3	1
176	Sugarcane_control	3	3	3	1
177	Sugarcane_control	3	2	3	2
178	Sugarcane_control	3	3	3	2
179	Sugarcane_control	3	2	3	3
180	Sugarcane_control	2	3	3	2
181	Sugarcane_control	1	2	3	3
182	Sugarcane_control	2	3	3	3
183	Sugarcane_control	3	2	3	3
184	Sugarcane_control	4	3	3	3
185	Sugarcane_control	1	1	1	2
186	Sugarcane_control	1	1	1	3
187	Sugarcane_control	1	1	1	3
188	Sugarcane_control	3	4	4	4
189	Sugarcane_control	3	4	3	3
190	Sugarcane_control	2	2	4	4
191	Sugarcane_control	3	2	3	3
192	Sugarcane_control	3	2	2	2
193	Sugarcane_control	2	3	1	2
194	Sugarcane_control	2	2	1	3
195	Sugarcane_control	3	3	1	3
196	Sugarcane_control	3	4	1	2
197	Sugarcane_control	3	3	1	3
198	Sugarcane_control	4	4	1	2
199	Sugarcane_control	4	3	1	1
200	Sugarcane_control	4	2	1	2
201	Oilpalm_Worker	4	1	2	2
202	Oilpalm_Worker	3	4	3	2
203	Oilpalm_Worker	3	4	4	3
204	Oilpalm_Worker	2	4	4	4
205	Oilpalm_Worker	3	4	3	2
206	Oilpalm_Worker	3	4	4	4
207	Oilpalm_Worker	4	4	4	4
208	Oilpalm_Worker	4	4	4	4
209	Oilpalm_Worker	3	4	4	4
210	Oilpalm_Worker	2	4	4	4
211	Oilpalm_Worker	4	2	4	1
212	Oilpalm_Worker	4	2	4	1
213	Oilpalm_Worker	4	2	4	1
214	Oilpalm_Worker	4	2	4	1
215	Oilpalm_Worker	4	2	4	1
216	Oilpalm_Worker	3	1	4	2
217	Oilpalm_Worker	4	2	4	1
218	Oilpalm_Worker	4	3	4	2
219	Oilpalm_Worker	4	4	4	4
220	Oilpalm_Worker	4	2	4	2
221	Oilpalm_Worker	4	3	4	1
222	Oilpalm_Worker	4	4	4	4
223	Oilpalm_Worker	3	3	3	2
224	Oilpalm_Worker	2	3	2	2
225	Oilpalm_Worker	2	3	2	2
226	Oilpalm_Worker	2	3	2	2
227	Oilpalm_Worker	4	4	4	4
228	Oilpalm_Worker	4	3	4	3
229	Oilpalm_Worker	4	4	4	4
230	Oilpalm_Worker	2	3	2	3
231	Oilpalm_Worker	4	2	4	4
232	Oilpalm_Worker	4	3	3	3
233	Oilpalm_Worker	4	4	3	3
234	Oilpalm_Worker	4	2	2	2
235	Oilpalm_Worker	3	4	3	3
236	Oilpalm_Worker	2	4	3	4
237	Oilpalm_Worker	4	4	3	4
238	Oilpalm_Worker	4	4	4	4
239	Oilpalm_Worker	4	3	2	4
240	Oilpalm_Worker	4	3	2	2
241	Oilpalm_Worker	2	2	2	3
242	Oilpalm_Worker	4	4	3	2
243	Oilpalm_Worker	4	4	3	2
244	Oilpalm_Worker	4	4	3	2
245	Oilpalm_Worker	4	4	4	2
246	Oilpalm_Worker	4	3	4	3
247	Oilpalm_Worker	4	3	4	3
248	Oilpalm_Worker	4	3	4	3
249	Oilpalm_Worker	3	4	4	4
250	Oilpalm_Worker	3	3	3	4
251	Oilpalm_Worker	2	3	3	4
252	Oilpalm_Worker	4	4	4	4
253	Oilpalm_Worker	3	4	3	4
254	Oilpalm_Worker	2	4	4	3
255	Oilpalm_Worker	2	3	4	4
256	Oilpalm_Worker	4	4	3	3
257	Oilpalm_Worker	3	2	3	4
258	Oilpalm_Worker	3	2	3	4
259	Oilpalm_Worker	4	2	3	3
260	Oilpalm_Worker	4	3	3	3
261	Oilpalm_Worker	4	3	3	3
262	Oilpalm_Worker	4	3	3	3
263	Oilpalm_Worker	4	3	3	4
264	Oilpalm_Worker	4	3	3	4
265	Oilpalm_Worker	4	3	4	4
266	Oilpalm_Worker	4	3	4	4
267	Oilpalm_Worker	4	3	4	2
268	Oilpalm_Worker	4	2	2	2
269	Oilpalm_Worker	4	3	2	3
270	Oilpalm_Worker	4	4	3	4
271	Oilpalm_Worker	3	2	4	3
272	Oilpalm_Worker	3	2	4	4
273	Oilpalm_Worker	3	2	4	4
274	Oilpalm_Worker	4	3	4	2
275	Oilpalm_Worker	4	2	4	2
276	Oilpalm_Worker	4	2	3	2
277	Oilpalm_Worker	4	2	2	3
278	Oilpalm_Worker	3	4	4	4
279	Oilpalm_Worker	3	4	3	4
280	Oilpalm_Worker	3	4	4	2
281	Oilpalm_Worker	4	2	4	2
282	Oilpalm_Worker	4	2	4	4
283	Oilpalm_Worker	4	2	4	4
284	Oilpalm_Worker	4	2	4	4
285	Oilpalm_Worker	4	3	4	4
286	Oilpalm_Worker	4	3	4	3
287	Oilpalm_Worker	4	3	4	3
288	Oilpalm_Worker	4	3	4	3
289	Oilpalm_Worker		3	4	3
290	Oilpalm_Worker	4	3	3	3
291	Oilpalm_Worker	4	4	4	4
292	Oilpalm_Worker	3	4	2	2
293	Oilpalm_Worker	4	3	4	2
294	Oilpalm_Worker	4	3	2	4
295	Oilpalm_Worker	2	4	4	4
296	Oilpalm_Worker	4	2	2	4
297	Oilpalm_Worker	3	4	4	3
298	Oilpalm_Worker	2	4	4	4
299	Oilpalm_Worker	2	4	4	4
300	Oilpalm_Worker	2	2	2	3
301	Oilpalm_Outgrower	4	2	4	2
302	Oilpalm_Outgrower	4	4	4	4
303	Oilpalm_Outgrower	4	3	4	3
304	Oilpalm_Outgrower	3	3	4	3
305	Oilpalm_Outgrower	2	3	4	2
306	Oilpalm_Outgrower	1	1	1	1
307	Oilpalm_Outgrower	1	1	1	4
308	Oilpalm_Outgrower	3	3	3	3
309	Oilpalm_Outgrower	3	3	3	3
310	Oilpalm_Outgrower	3	3	3	3
311	Oilpalm_Outgrower	2	3	2	2
312	Oilpalm_Outgrower	3	3	2	2
313	Oilpalm_Outgrower	2	2	2	2
314	Oilpalm_Outgrower	2	2	4	4
315	Oilpalm_Outgrower	4	4	4	3
316	Oilpalm_Outgrower	2	3	4	4
317	Oilpalm_Outgrower	4	3	4	4
318	Oilpalm_Outgrower	3	3	4	2
319	Oilpalm_Outgrower	4	4	4	1
320	Oilpalm_Outgrower	4	4	4	4
321	Oilpalm_Outgrower	3	3	4	4
322	Oilpalm_Outgrower	4	4	4	4
323	Oilpalm_Outgrower	4	3	2	3
324	Oilpalm_Outgrower	3	3	4	3
325	Oilpalm_Outgrower	4	3	4	3
326	Oilpalm_Outgrower	4	3	3	4
327	Oilpalm_Outgrower	3	4	4	4
328	Oilpalm_Outgrower	1	2	1	4
329	Oilpalm_Outgrower	1	4	2	1
330	Oilpalm_Outgrower	4	2	4	1
331	Oilpalm_Outgrower	4	3	4	1
332	Oilpalm_Outgrower	4	2	4	1
333	Oilpalm_Outgrower	4	1	4	1
334	Oilpalm_Outgrower	3	4	4	3
335	Oilpalm_Outgrower	4	4	4	3
336	Oilpalm_Outgrower	4	3	4	4
337	Oilpalm_Outgrower	3	3	4	4
338	Oilpalm_Outgrower	1	2	2	1
339	Oilpalm_Outgrower	2	1	2	3
340	Oilpalm_Outgrower	2	2	1	3
341	Oilpalm_Outgrower	2	1	3	2
342	Oilpalm_Outgrower	3	3	3	3
343	Oilpalm_Outgrower	3	3	4	4
344	Oilpalm_Outgrower	3	3	4	4
345	Oilpalm_Outgrower	3	3	4	4
346	Oilpalm_Outgrower	3	4	4	3
347	Oilpalm_Outgrower	3	3	2	2
348	Oilpalm_Outgrower	3	3	2	2
349	Oilpalm_Outgrower	2	2	2	2
350	Oilpalm_Outgrower	4	4	4	4
351	Oilpalm_Outgrower	3	3	4	4
352	Oilpalm_Outgrower	4	3	4	4
353	Oilpalm_Outgrower	3	3	3	3
354	Oilpalm_Outgrower	3	3	3	3
355	Oilpalm_Outgrower	3	3	3	3
356	Oilpalm_Outgrower	3	3	3	3
357	Oilpalm_Outgrower	1	2	1	1
358	Oilpalm_Outgrower	3	3	3	3
359	Oilpalm_Outgrower	3	3	3	3
360	Oilpalm_Outgrower	2	3	2	3
361	Oilpalm_Outgrower	2	3	2	1
362	Oilpalm_Outgrower	3	3	2	2
363	Oilpalm_Outgrower	3	3	3	3
364	Oilpalm_Outgrower	3	3	3	3
365	Oilpalm_Outgrower	3	3	3	3
366	Oilpalm_Outgrower	4	3	3	4
367	Oilpalm_Outgrower	2	2	3	1
368	Oilpalm_Outgrower	2	2	3	2
369	Oilpalm_Outgrower	4	4	4	2
370	Oilpalm_Outgrower	2	2	2	3
371	Oilpalm_Outgrower	2	3	2	2
372	Oilpalm_Outgrower	2	2	3	2
373	Oilpalm_Outgrower	2	2	3	1
374	Oilpalm_Outgrower	2	2	2	3
375	Oilpalm_Outgrower	1	2	2	4
376	Oilpalm_Outgrower	1	1	1	4
377	Oilpalm_Outgrower	1	1	1	4
378	Oilpalm_Outgrower	3	3	3	3
379	Oilpalm_Outgrower	3	3	3	2
380	Oilpalm_Outgrower	3	3	3	3
381	Oilpalm_Outgrower	4	3	3	3
382	Oilpalm_Outgrower	2	3	3	3
383	Oilpalm_Outgrower	2	3	3	3
384	Oilpalm_Outgrower	2	2	3	2
385	Oilpalm_Outgrower	2	2	2	3
386	Oilpalm_Outgrower	2	2	2	3
387	Oilpalm_Outgrower	2	2	2	3
388	Oilpalm_Outgrower	2	2	2	3
389	Oilpalm_Outgrower	2	2	2	3
390	Oilpalm_Outgrower	2	3	2	2
391	Oilpalm_Outgrower	2	2	2	2
392	Oilpalm_Outgrower	2	2	1	2
393	Oilpalm_Outgrower	2	3	1	2
394	Oilpalm_Outgrower	2	3	2	2
395	Oilpalm_Outgrower	2	3	2	2
396	Oilpalm_Outgrower	4	2	4	3
397	Oilpalm_Outgrower	4	2	4	3
398	Oilpalm_Outgrower	2	2	2	3
399	Oilpalm_Outgrower	4	2	4	2
400	Oilpalm_Outgrower	3	3	2	3
401	Oilpalm_Independent_smallholder	4	4	4	4
402	Oilpalm_Independent_smallholder	4	3	4	3
403	Oilpalm_Independent_smallholder	4	3	4	4
404	Oilpalm_Independent_smallholder	4	3	4	3
405	Oilpalm_Independent_smallholder	4	2	4	1
406	Oilpalm_Independent_smallholder	4	2	4	1
407	Oilpalm_Independent_smallholder	4	3	4	3
408	Oilpalm_Independent_smallholder	4	4	4	3
409	Oilpalm_Independent_smallholder	3	3	3	3
410	Oilpalm_Independent_smallholder	3	3	3	3
411	Oilpalm_Independent_smallholder	3	3	3	3
412	Oilpalm_Independent_smallholder	3	3	3	3
413	Oilpalm_Independent_smallholder	4	2	4	1
414	Oilpalm_Independent_smallholder	3	3	4	4
415	Oilpalm_Independent_smallholder	2	2	4	3
416	Oilpalm_Independent_smallholder	3	3	2	2
417	Oilpalm_Independent_smallholder	3	3	3	3
418	Oilpalm_Independent_smallholder	3	3	3	3
419	Oilpalm_Independent_smallholder	3	3	3	3
420	Oilpalm_Independent_smallholder	3	3	3	3
421	Oilpalm_Independent_smallholder	3	3	3	3
422	Oilpalm_Independent_smallholder	3	3	3	3
423	Oilpalm_Independent_smallholder	3	3	3	3
424	Oilpalm_Independent_smallholder	3	3	3	3
425	Oilpalm_Independent_smallholder	2	2	2	3
426	Oilpalm_Independent_smallholder	2	2	2	3
427	Oilpalm_Independent_smallholder	2	2	2	2
428	Oilpalm_Independent_smallholder	2	2	2	3
429	Oilpalm_Independent_smallholder	2	2	2	3
430	Oilpalm_Independent_smallholder	2	2	3	2
431	Oilpalm_Independent_smallholder	2	2	2	3
432	Oilpalm_Independent_smallholder	2	2	2	3
433	Oilpalm_Independent_smallholder	2	2	2	3
434	Oilpalm_Independent_smallholder	2	2	2	3
435	Oilpalm_Independent_smallholder	2	2	2	3
436	Oilpalm_Independent_smallholder	2	2	2	3
437	Oilpalm_Independent_smallholder	3	4	3	2
438	Oilpalm_Independent_smallholder	2	2	2	2
439	Oilpalm_Independent_smallholder	2	3	2	3
440	Oilpalm_Independent_smallholder	2	3	2	3
441	Oilpalm_Independent_smallholder	4	3	4	4
442	Oilpalm_Independent_smallholder	2	2	4	3
443	Oilpalm_Independent_smallholder	2	2	1	2
444	Oilpalm_Independent_smallholder	2	2	2	2
445	Oilpalm_Independent_smallholder	4	2	4	1
446	Oilpalm_Independent_smallholder	3	3	3	3
447	Oilpalm_Independent_smallholder	3	3	3	3
448	Oilpalm_Independent_smallholder	3	3	2	2
449	Oilpalm_Independent_smallholder	4	3	3	3
450	Oilpalm_Independent_smallholder	3	4	3	4
451	Oilpalm_Independent_smallholder	3	4	4	3
452	Oilpalm_Independent_smallholder	4	4	4	4
453	Oilpalm_Independent_smallholder	4	4	4	4
454	Oilpalm_Independent_smallholder	4	4	4	4
455	Oilpalm_Independent_smallholder	2	2	4	2
456	Oilpalm_Independent_smallholder	2	2	4	1
457	Oilpalm_Independent_smallholder	2	4	4	2
458	Oilpalm_Independent_smallholder	4	4	4	4
459	Oilpalm_Independent_smallholder	3	3	4	4
460	Oilpalm_Independent_smallholder	3	3	3	3
461	Oilpalm_Independent_smallholder	2	2	3	2
462	Oilpalm_Independent_smallholder	3	3	3	3
463	Oilpalm_Independent_smallholder	3	3	3	3
464	Oilpalm_Independent_smallholder	3	3	3	3
465	Oilpalm_Independent_smallholder	2	2	2	3
466	Oilpalm_Independent_smallholder	3	2	3	3
467	Oilpalm_Independent_smallholder	4	2	4	2
468	Oilpalm_Independent_smallholder	4	2	4	2
469	Oilpalm_Independent_smallholder	4	4	4	2
470	Oilpalm_Independent_smallholder	3	2	4	2
471	Oilpalm_Independent_smallholder	4	2	4	1
472	Oilpalm_Independent_smallholder	4	2	4	2
473	Oilpalm_Independent_smallholder	4	3	4	1
474	Oilpalm_Independent_smallholder	4	2	4	1
475	Oilpalm_Independent_smallholder	4	3	4	1
476	Oilpalm_Independent_smallholder	4	2	4	1
477	Oilpalm_Independent_smallholder	3	2	4	1
478	Oilpalm_Independent_smallholder	4	2	4	1
479	Oilpalm_Independent_smallholder	3	2	4	2
480	Oilpalm_Independent_smallholder	4	2	4	2
481	Oilpalm_Independent_smallholder	3	3	2	3
482	Oilpalm_Independent_smallholder	4	2	4	1
483	Oilpalm_Independent_smallholder	4	2	4	1
484	Oilpalm_Independent_smallholder	2	3	4	4
485	Oilpalm_Independent_smallholder	2	3	4	3
486	Oilpalm_Independent_smallholder	2	3	4	3
487	Oilpalm_Independent_smallholder	2	3	4	3
488	Oilpalm_Independent_smallholder	2	3	4	3
489	Oilpalm_Independent_smallholder	2	3	4	3
490	Oilpalm_Independent_smallholder	2	3	4	3
491	Oilpalm_Independent_smallholder	2	3	4	3
492	Oilpalm_Independent_smallholder	2	3	4	3
493	Oilpalm_Independent_smallholder	1	1	1	4
494	Oilpalm_Independent_smallholder	3	1	3	4
495	Oilpalm_Independent_smallholder	2	2	1	4
496	Oilpalm_Independent_smallholder	3	2	4	2
497	Oilpalm_Independent_smallholder	1	1	1	4
498	Oilpalm_Independent_smallholder	4	2	4	2
499	Oilpalm_Independent_smallholder	4	2	4	2
500	Oilpalm_Independent_smallholder	4	2	4	2
501	Oilpalm_Control	4	4	4	3
502	Oilpalm_Control	3	3	3	3
503	Oilpalm_Control	3	1	3	3
504	Oilpalm_Control	3	2	2	3
505	Oilpalm_Control	1	3	2	1
506	Oilpalm_Control	2	2	2	3
507	Oilpalm_Control	1	3	2	1
508	Oilpalm_Control	1	3	2	1
509	Oilpalm_Control	1	3	2	1
510	Oilpalm_Control	1	2	2	1
511	Oilpalm_Control	4	4	4	1
512	Oilpalm_Control	4	4	4	4
513	Oilpalm_Control	3	3	3	4
514	Oilpalm_Control	3	2	3	3
515	Oilpalm_Control	4	2	4	1
516	Oilpalm_Control	4	4	4	3
517	Oilpalm_Control	2	2	3	2
518	Oilpalm_Control	2	1	2	3
519	Oilpalm_Control	2	1	2	3
520	Oilpalm_Control	3	2	2	3
521	Oilpalm_Control	3	3	3	3
522	Oilpalm_Control	3	2	2	2
523	Oilpalm_Control	2	2	3	2
524	Oilpalm_Control	3	3	3	3
525	Oilpalm_Control	2	2	3	3
526	Oilpalm_Control	2	2	2	2
527	Oilpalm_Control	3	2	3	3
528	Oilpalm_Control	2	2	3	3
529	Oilpalm_Control	2	2	3	1
530	Oilpalm_Control	3	2	3	1
531	Oilpalm_Control	2	2	3	2
532	Oilpalm_Control	3	3	3	3
533	Oilpalm_Control	4	3	3	3
534	Oilpalm_Control	3	3	3	3
535	Oilpalm_Control	3	3	3	3
536	Oilpalm_Control	3	3	3	3
537	Oilpalm_Control	4	3	2	3
538	Oilpalm_Control	2	3	3	2
539	Oilpalm_Control	4	4	4	4
540	Oilpalm_Control	2	3	2	2
541	Oilpalm_Control	2	2	2	2
542	Oilpalm_Control	4	3	2	3
543	Oilpalm_Control	4	3	2	3
544	Oilpalm_Control	3	3	3	3
545	Oilpalm_Control	3	3	3	3
546	Oilpalm_Control	3	3	2	2
547	Oilpalm_Control	3	3	3	3
548	Oilpalm_Control	2	3	3	3
549	Oilpalm_Control	3	3	2	2
550	Oilpalm_Control	2	3	3	3
551	Oilpalm_Control	4	4	4	4
552	Oilpalm_Control	4	3	4	4
553	Oilpalm_Control	1	2	2	1
554	Oilpalm_Control	3	4	1	2
555	Oilpalm_Control	4	3	4	4
556	Oilpalm_Control	3	4	4	3
557	Oilpalm_Control	2	2	2	2
558	Oilpalm_Control	2	2	1	2
559	Oilpalm_Control	4	3	4	4
560	Oilpalm_Control	2	2	2	2
561	Oilpalm_Control	2	3	2	3
562	Oilpalm_Control	1	2	2	2
563	Oilpalm_Control	2	2	3	2
564	Oilpalm_Control	3	3	1	1
565	Oilpalm_Control	4	3	4	3
566	Oilpalm_Control	3	3	3	3
567	Oilpalm_Control	3	3	3	3
568	Oilpalm_Control	2	1	3	1
569	Oilpalm_Control	3	1	3	1
570	Oilpalm_Control	2	1	3	2
571	Oilpalm_Control	2	3	2	2
572	Oilpalm_Control	2	2	3	2
573	Oilpalm_Control	2	1	2	3
574	Oilpalm_Control	2	1	2	3
575	Oilpalm_Control	3	2	2	3
576	Oilpalm_Control	3	3	3	3
577	Oilpalm_Control	3	2	2	2
578	Oilpalm_Control	2	2	3	2
579	Oilpalm_Control	3	3	3	3
580	Oilpalm_Control	2	2	3	3
581	Oilpalm_Control	2	2	2	2
582	Oilpalm_Control	3	2	3	3
583	Oilpalm_Control	2	2	3	3
584	Oilpalm_Control	2	2	3	1
585	Oilpalm_Control	3	2	3	1
586	Oilpalm_Control	2	2	3	2
587	Oilpalm_Control	3	3	3	3
588	Oilpalm_Control	4	3	3	3
589	Oilpalm_Control	3	3	3	3
590	Oilpalm_Control	3	3	3	3
591	Oilpalm_Control	3	3	3	3
592	Oilpalm_Control	4	3	2	3
593	Oilpalm_Control	2	3	3	2
594	Oilpalm_Control	4	4	4	4
595	Oilpalm_Control	2	3	2	2
596	Oilpalm_Control	2	2	2	2
597	Oilpalm_Control	4	3	2	3
598	Oilpalm_Control	4	3	2	3
599	Oilpalm_Control	3	3	3	3
600	Oilpalm_Control	3	3	3	3
601	Jatropha_PermanentWorker	4	3	4	3
602	Jatropha_PermanentWorker	4	4	3	3
603	Jatropha_PermanentWorker	4	3	4	4
604	Jatropha_PermanentWorker	3	2	3	3
605	Jatropha_PermanentWorker	4	4	4	4
606	Jatropha_PermanentWorker	3	3	3	3
607	Jatropha_PermanentWorker	3	2	3	3
608	Jatropha_PermanentWorker	3	3	3	3
609	Jatropha_PermanentWorker	3	3	3	3
610	Jatropha_PermanentWorker	4	4	4	4
611	Jatropha_PermanentWorker	4	4	4	4
612	Jatropha_PermanentWorker	4	3	4	4
613	Jatropha_PermanentWorker	3	3	3	3
614	Jatropha_PermanentWorker	3	3	3	3
615	Jatropha_PermanentWorker	3	3	3	3
616	Jatropha_PermanentWorker	3	3	3	3
617	Jatropha_PermanentWorker	3	3	3	3
618	Jatropha_PermanentWorker	3	3	3	3
619	Jatropha_PermanentWorker	4	4	4	4
620	Jatropha_PermanentWorker	4	4	4	4
621	Jatropha_PermanentWorker	4	4	4	4
622	Jatropha_PermanentWorker	4	4	4	4
623	Jatropha_PermanentWorker	3	3	3	3
624	Jatropha_PermanentWorker	3	3	3	3
625	Jatropha_PermanentWorker	2	2	3	2
626	Jatropha_PermanentWorker	2	2	2	2
627	Jatropha_PermanentWorker	2	2	2	2
628	Jatropha_PermanentWorker	3	3	3	3
629	Jatropha_PermanentWorker	4	3	3	4
630	Jatropha_PermanentWorker	3	3	4	4
631	Jatropha_PermanentWorker	3	3	3	3
632	Jatropha_PermanentWorker	3	4	3	4
633	Jatropha_PermanentWorker	3	3	4	4
634	Jatropha_PermanentWorker	4	3	3	4
635	Jatropha_PermanentWorker	4	4	4	1
636	Jatropha_PermanentWorker	4	4	4	4
637	Jatropha_PermanentWorker	4	4	4	1
638	Jatropha_PermanentWorker	4	4	4	4
639	Jatropha_PermanentWorker	3	3	3	3
640	Jatropha_PermanentWorker	3	3	4	2
641	Jatropha_PermanentWorker	4	4	4	3
642	Jatropha_PermanentWorker	2	2	2	2
643	Jatropha_PermanentWorker	3	3	3	3
644	Jatropha_PermanentWorker	4	3	4	1
645	Jatropha_PermanentWorker	4	2	4	1
646	Jatropha_PermanentWorker	3	3	3	3
647	Jatropha_PermanentWorker	3	3	3	3
648	Jatropha_PermanentWorker	3	3	3	3
649	Jatropha_PermanentWorker	2	2	2	2
650	Jatropha_PermanentWorker	3	3	3	4
651	Jatropha_PermanentWorker	4	3	3	4
652	Jatropha_PermanentWorker	3	3	4	4
653	Jatropha_PermanentWorker	3	3	3	3
654	Jatropha_PermanentWorker	3	3	4	3
655	Jatropha_PermanentWorker	4	4	4	4
656	Jatropha_PermanentWorker	4	3	4	1
657	Jatropha_PermanentWorker	3	3	3	3
658	Jatropha_PermanentWorker	3	3	4	3
659	Jatropha_PermanentWorker	3	3	3	3
660	Jatropha_PermanentWorker	3	3	3	3
661	Jatropha_PermanentWorker	3	3	3	3
662	Jatropha_PermanentWorker	2	3	3	3
663	Jatropha_PermanentWorker	3	2	3	2
664	Jatropha_PermanentWorker	3	3	3	3
665	Jatropha_PermanentWorker	3	3	3	3
666	Jatropha_PermanentWorker	3	3	3	3
667	Jatropha_PermanentWorker	3	3	3	3
668	Jatropha_PermanentWorker	3	3	3	3
669	Jatropha_PermanentWorker	4	3	4	4
670	Jatropha_PermanentWorker	3	3	3	3
671	Jatropha_PermanentWorker	3	3	3	4
672	Jatropha_PermanentWorker	3	3	3	3
673	Jatropha_PermanentWorker	3	3	3	3
674	Jatropha_PermanentWorker	3	3	3	3
675	Jatropha_PermanentWorker	3	3	3	3
676	Jatropha_PermanentWorker	2	2	2	3
677	Jatropha_PermanentWorker	3	3	3	3
678	Jatropha_PermanentWorker	3	3	3	3
679	Jatropha_PermanentWorker	3	3	3	3
680	Jatropha_PermanentWorker	3	3	3	3
681	Jatropha_PermanentWorker	3	4	3	3
682	Jatropha_PermanentWorker	2	2	3	2
683	Jatropha_PermanentWorker	4	2	4	1
684	Jatropha_PermanentWorker	4	2	4	1
685	Jatropha_PermanentWorker	4	2	4	2
686	Jatropha_PermanentWorker	4	4	4	1
687	Jatropha_PermanentWorker	4	3	4	1
688	Jatropha_PermanentWorker	3	3	3	3
689	Jatropha_PermanentWorker	2	2	2	2
690	Jatropha_PermanentWorker	2	2	2	2
691	Jatropha_PermanentWorker	2	2	2	2
692	Jatropha_PermanentWorker	3	2	2	3
693	Jatropha_PermanentWorker	3	2	2	2
694	Jatropha_PermanentWorker	2	2	3	3
695	Jatropha_PermanentWorker	2	2	3	3
696	Jatropha_PermanentWorker	2	2	3	3
697	Jatropha_PermanentWorker	2	2	3	3
698	Jatropha_PermanentWorker	2	2	3	3
699	Jatropha_PermanentWorker	2	2	3	3
700	Jatropha_PermanentWorker	2	2	3	3
701	Jatropha_SeasonalWorker	2	2	3	3
702	Jatropha_SeasonalWorker	3	3	3	3
703	Jatropha_SeasonalWorker	3	2	3	3
704	Jatropha_SeasonalWorker	3	3	3	3
705	Jatropha_SeasonalWorker	3	3	3	3
706	Jatropha_SeasonalWorker	4	3	4	2
707	Jatropha_SeasonalWorker	3	3	3	3
708	Jatropha_SeasonalWorker	3	3	3	3
709	Jatropha_SeasonalWorker	2	2	2	2
710	Jatropha_SeasonalWorker	3	2	2	2
711	Jatropha_SeasonalWorker	4	3	4	3
712	Jatropha_SeasonalWorker	4	3	3	1
713	Jatropha_SeasonalWorker	4	3	3	1
714	Jatropha_SeasonalWorker	4	2	4	1
715	Jatropha_SeasonalWorker	4	3	3	1
716	Jatropha_SeasonalWorker	4	3	3	1
717	Jatropha_SeasonalWorker	3	3	3	3
718	Jatropha_SeasonalWorker	3	3	3	3
719	Jatropha_SeasonalWorker	3	3	3	1
720	Jatropha_SeasonalWorker	3	3	3	3
721	Jatropha_SeasonalWorker	4	3	4	1
722	Jatropha_SeasonalWorker	4	4	4	4
723	Jatropha_SeasonalWorker	3	2	2	3
724	Jatropha_SeasonalWorker	3	3	3	3
725	Jatropha_SeasonalWorker	3	3	3	3
726	Jatropha_SeasonalWorker	3	3	3	3
727	Jatropha_SeasonalWorker	3	3	3	3
728	Jatropha_SeasonalWorker	3	3	3	3
729	Jatropha_SeasonalWorker	3	3	3	3
730	Jatropha_SeasonalWorker	3	3	3	3
731	Jatropha_SeasonalWorker	4	3	3	3
732	Jatropha_SeasonalWorker	3	2	3	3
733	Jatropha_SeasonalWorker	3	3	4	3
734	Jatropha_SeasonalWorker	2	3	3	3
735	Jatropha_SeasonalWorker	3	3	3	3
736	Jatropha_SeasonalWorker	3	3	3	3
737	Jatropha_SeasonalWorker	2	2	2	2
738	Jatropha_SeasonalWorker	3	4	4	4
739	Jatropha_SeasonalWorker	3	1	1	1
740	Jatropha_SeasonalWorker	3	3	3	4
741	Jatropha_SeasonalWorker	3	3	4	4
742	Jatropha_SeasonalWorker	3	3	3	3
743	Jatropha_SeasonalWorker	2	3	3	3
744	Jatropha_SeasonalWorker	2	2	2	2
745	Jatropha_SeasonalWorker	3	3	3	3
746	Jatropha_SeasonalWorker	2	2	2	2
747	Jatropha_SeasonalWorker	3	3	3	3
748	Jatropha_SeasonalWorker	2	2	2	2
749	Jatropha_SeasonalWorker	3	3	4	4
750	Jatropha_SeasonalWorker	3	4	4	4
751	Jatropha_Control	3	4	4	4
752	Jatropha_Control	1	2	2	2
753	Jatropha_Control	2	2	2	2
754	Jatropha_Control	3	3	3	3
755	Jatropha_Control	3	3	3	3
756	Jatropha_Control	3	3	3	3
757	Jatropha_Control	4	3	4	4
758	Jatropha_Control	2	2	3	2
759	Jatropha_Control	2	2	2	2
760	Jatropha_Control	3	3	4	4
761	Jatropha_Control	3	4	4	4
762	Jatropha_Control	3	4	4	4
763	Jatropha_Control	1	3	3	1
764	Jatropha_Control	1	3	3	2
765	Jatropha_Control	4	3	4	4
766	Jatropha_Control	4	4	3	1
767	Jatropha_Control	4	3	4	4
768	Jatropha_Control	4	4	4	4
769	Jatropha_Control	3	3	3	3
770	Jatropha_Control	3	3	4	3
771	Jatropha_Control	4	3	4	3
772	Jatropha_Control	3	3	3	3
773	Jatropha_Control	4	4	4	3
774	Jatropha_Control	4	3	4	2
775	Jatropha_Control	4	4	4	4
776	Jatropha_Control	4	4	3	3
777	Jatropha_Control	4	4	4	4
778	Jatropha_Control	3	2	3	3
779	Jatropha_Control	3	3	4	3
780	Jatropha_Control	2	3	3	3
781	Jatropha_Control	3	3	3	3
782	Jatropha_Control	3	3	3	3
783	Jatropha_Control	2	2	2	2
784	Jatropha_Control	3	4	4	4
785	Jatropha_Control	3	1	1	1
786	Jatropha_Control	3	3	3	4
787	Jatropha_Control	3	3	4	4
788	Jatropha_Control	3	3	3	3
789	Jatropha_Control	2	3	3	3
790	Jatropha_Control	2	2	2	2
791	Jatropha_Control	3	3	3	3
792	Jatropha_Control	2	2	2	2
793	Jatropha_Control	3	3	3	3
794	Jatropha_Control	2	3	4	2
795	Jatropha_Control	1	2	4	2
796	Jatropha_Control	4	4	3	4
797	Jatropha_Control	4	4	4	3
798	Jatropha_Control	1	3	4	3
799	Jatropha_Control	4	4	4	1
800	Jatropha_Control	1	1	4	4
801	Jatropha_Control	4	3	4	1
802	Jatropha_Control	4	3	4	1
803	Jatropha_Control	4	3	4	1
804	Jatropha_Control	4	3	4	1
805	Jatropha_Control	4	2	3	1
806	Jatropha_Control	4	3	4	1
807	Jatropha_Control	4	3	4	1
808	Jatropha_Control	4	2	4	1
809	Jatropha_Control	4	2	3	1
810	Jatropha_Control	4	3	3	1
811	Jatropha_Control	4	3	4	1
812	Jatropha_Control	4	3	4	1
813	Jatropha_Control	3	3	3	3
814	Jatropha_Control	3	1	3	3
815	Jatropha_Control	3	3	3	1
816	Jatropha_Control	3	3	3	3
817	Jatropha_Control	3	3	3	3
818	Jatropha_Control	3	1	3	3
819	Jatropha_Control	3	3	3	3
820	Jatropha_Control	4	3	3	1
821	Jatropha_Control	4	4	4	4
822	Jatropha_Control	3	3	3	3
823	Jatropha_Control	4	4	4	4
824	Jatropha_Control	1	1	1	2
825	Jatropha_Control	4	4	4	4
826	Jatropha_Control	1	1	1	1
827	Jatropha_Control	4	4	4	4
828	Jatropha_Control	4	4	4	4
829	Jatropha_Control	4	4	4	4
830	Jatropha_Control	4	4	4	4
831	Jatropha_Control	4	4	4	4
832	Jatropha_Control	3	3	3	3
833	Jatropha_Control	4	3	4	1
834	Jatropha_Control	4	3	4	1
835	Jatropha_Control	4	4	4	1
836	Jatropha_Control	4	4	4	1
837	Jatropha_Control	4	2	4	1
838	Jatropha_Control	3	3	3	3
839	Jatropha_Control	3	3	3	3
840	Jatropha_Control	3	3	3	3
841	Jatropha_Control	4	4	4	4
842	Jatropha_Control	4	4	4	4
843	Jatropha_Control	4	3	3	3
844	Jatropha_Control	3	3	4	4
845	Jatropha_Control	2	4	4	4
846	Jatropha_Control	3	3	3	3
847	Jatropha_Control	3	1	2	2
848	Jatropha_Control	4	4	4	4
849	Jatropha_Control	3	3	3	3
850	Jatropha_Control	3	3	3	3
